1 **Biocontrol of *Aspergillus niger* in 3D-lung cell tissues by oxalotrophic bacteria**

2

3 **Running title: Bacteria-induced control of *Aspergillus***

4

5 Fabio Palmieri<sup>1</sup>, Ilona Palmieri<sup>1</sup>, Nourine Noormamode<sup>1</sup>, Aislinn Estoppey<sup>1</sup>, M. Omar Ishak<sup>2</sup>,  
6 Julia M. Kelliher<sup>2</sup>, Armelle Vallat<sup>3</sup>, Rashi Iyer<sup>4</sup>, Saskia Bindschedler<sup>1</sup>, Karen Davenport<sup>2</sup>, Patrick  
7 S. G. Chain<sup>2</sup>, Jennifer Foster Harris<sup>2</sup>, Pilar Junier<sup>1\*</sup>.

8

9 <sup>1</sup> Laboratory of Microbiology, Institute of Biology, University of Neuchâtel, Neuchâtel,  
10 Switzerland.

11 <sup>2</sup> Bioscience Division, Los Alamos National Laboratory, Los Alamos, NM, USA.

12 <sup>3</sup> Neuchâtel Platform of Analytical Chemistry, University of Neuchâtel, Neuchâtel, Switzerland

13 <sup>4</sup> Analytics, Intelligence and Technology Division, Los Alamos National Laboratory, Los  
14 Alamos, NM, USA.

15

16 \*Corresponding author

17 E-mail: pilar.junier@unine.ch (PJ)

## 18 **Abstract**

19 *Aspergillus* fungi are opportunistic pathogens that affect a large number of people worldwide.  
20 Many aspects of *Aspergillus* spp. pathogenesis toward humans are known, but their ability to  
21 enhance their infectious potential by manipulating the environmental pH of its host has not  
22 been considered yet. In this study, we tested the hypothesis that by producing oxalic acid,  
23 *Aspergillus niger* can manipulate pH during lung infection and thus, interfering with this  
24 process could limit pathogenicity. To test this hypothesis, we co-cultured *A. niger* with  
25 oxalotrophic bacteria in increasingly complex testing systems (Petri dishes and 3D-cell  
26 cultures systems). In *in vitro* tests, oxalotrophic bacteria limit oxalic acid production and  
27 suppressed the pH shift induced by *A. niger*. In 3D-cell cultures (Transwells® and  
28 Bronchioles-on-a-chip), *A. niger* also modified pH, Ca<sup>2+</sup> and oxalic acid concentrations. Co-  
29 inoculation with as little as 10 cells of the oxalotrophic bacterium strongly inhibited the  
30 germination and development of *A. niger* and returned each of the three parameters to the  
31 baseline physiological values of uninfected cells. This biocontrol interaction between  
32 oxalotrophic bacteria and oxalate-producing *A. niger* could represent a paradigm shift in the  
33 fight against opportunistic fungal pathogens, where the host environment is rendered less  
34 permissive to fungal development.

35

## 36 **Introduction**

37 Fungal diseases are estimated to kill more than 1.5 million people every year (1, 2). Over the  
38 last three decades, the increase in the number of at-risk individuals has correlated with an  
39 intensification in the burden of fungal disease on human health (3). As the size of at-risk  
40 populations (e.g. immunosuppressed patients) is expected to keep increasing in the future (2),  
41 tackling fungal pathogenesis is urgent. However, only a very limited number of antifungal  
42 drugs are used nowadays to control fungal pathogens. Because of this restricted chemical  
43 arsenal, the same classes of molecules are used in human health, animal husbandry, and  
44 agriculture, leading to the rise, and rapid spread, of resistance in fungal pathogens that can  
45 affect both plant and animal hosts (4). In spite of this, tackling fungal diseases has been  
46 largely neglected up to now (5).

47 The most prevalent fungal pathogens affecting humans are airborne opportunists such as  
48 *Aspergillus* spp., *Cryptococcus* spp., *Pneumocystis* spp., and human-associated commensals

49 like *Candida albicans* (6, 7). These fungal species are responsible for approximately 90% of  
50 the deaths due to fungal infection (1). The ecology of all these organisms plays a very  
51 significant role in their ability to transition to pathogenic lifestyles. For instance, the  
52 remarkable plasticity in the ecology and stress-response of *Aspergillus* spp. is believed to  
53 form the basis of its success as an opportunistic pathogen (8, 9).

54 Although many aspects of the ecology of *Aspergillus* spp. have been connected to  
55 pathogenicity (9), its ability to manipulate pH via the secretion of low molecular weight  
56 organic acids (LMWOA), and in particular, oxalic acid, has been largely ignored in the  
57 context of human pathogenesis. Several clinical reports have shown the presence of calcium  
58 oxalate (CaOx) crystals in pulmonary aspergillosis in animals and humans (10-15). Oxalic  
59 acid and oxalate crystals are thought to directly cause damage to the host tissues (including  
60 pulmonary blood vessels), and to generate free radicals which can harm cells indirectly (14).  
61 A recent case report of invasive pulmonary aspergillosis in a 69-year old man with lymphoma  
62 and pneumonia indicated the presence of CaOx crystals around blood vessels and within the  
63 blood vessel walls. This suggests a potential mechanical role of oxalate crystals in the  
64 angioinvasion of *Aspergillus* (15). However, a link between oxalic acid production and  
65 pathogenicity has not yet been made in fungi from this genus or in any other fungal human  
66 pathogen. On the contrary, oxalic acid production has been widely acknowledged as a  
67 pathogenicity factor in fungal plant pathogens, such as *Sclerotinia sclerotiorum* and *Botrytis*  
68 *cinerea* (16, 17) where pH manipulation and calcium chelation plays a direct role in  
69 pathogenesis (18-20). Both acidification and cation complexation in the local environment is  
70 exploited by plant pathogens to weaken the cell wall structure, facilitate infection, inhibit  
71 plant defenses, and induce programmed cell death (19, 21).

72 Oxalic acid is a ubiquitous compound in the environment and is thought to have a central role  
73 in fungal metabolism (19). Its production and consumption by microorganisms have been  
74 directly associated with pH regulation in soil (22). In such ecosystems, oxalic acid is often  
75 found complexed with divalent cations, especially calcium (23). Despite its chemical stability  
76 ( $K_{sp}$  CaOx monohydrate =  $2.32 \times 10^{-9}$ ), CaOx rarely accumulates (24, 25). This is because  
77 oxalate is used by soil oxalotrophic bacteria as carbon and energy sources. The transformation  
78 of a strong organic acid into a weaker one (oxalic acid *versus* carbonic acid;  $pK_a$  = 1.25 and  
79 4.14, respectively), leads to a local increase in soil pH. This overall process has been coined  
80 out in the oxalate-carbonate pathway (26). Moreover, oxalic acid plays a key role in

81 bacterial:fungal interactions acting as a signaling cue by bacteria in order to localize fungi and  
82 to establish different types of trophic interactions with them (27-29).

83 In this study we wanted to evaluate whether the metabolic processes associated to oxalic acid  
84 during *Aspergillus* spp. infection could parallel those occurring during its natural cycling in  
85 the oxalate-carbonate pathway in soils. Indeed, humans can be seen as a complex ecosystem  
86 governed by the same ecological principles affecting any other ecosystem (30). Thus, the  
87 ability of oxalotrophic bacteria to degrade oxalic acid produced by *Aspergillus* spp., and  
88 control the subsequent pH manipulation and calcium chelation, would result in a mechanism  
89 to control biologically this opportunistic fungal pathogen (Fig. 1). To test our hypothesis, we  
90 selected *Aspergillus niger* as a model. This organism is regarded as a safe relative of the more  
91 infectious *Aspergillus fumigatus* (31), and has been extensively studied for its ability to  
92 produce oxalic acid (32, 33). It is also a known agent of aspergillosis in humans, being  
93 responsible for 5% of the cases (9, 34). We first confirmed that *A. niger* secretes oxalic acid  
94 and assessed the effect of co-cultivation with oxalotrophic bacteria on pH and oxalic acid  
95 concentration, and on the inhibition of *A. niger*'s growth. This was done *in vitro* and on  
96 human bronchial epithelial cell (HBEC) cultures using two complementary 3D-cell cultures  
97 systems (Transwell® inserts and bronchioles-on-a-chip (BoC)).

98

## 99 **Results**

### 100 **Detection of oxalic acid produced by *Aspergillus niger* in different culture conditions**

101 Since the metabolism of fungi can change significantly depending on the nutritional  
102 conditions of the growth medium, we first tested whether our fungal strain produced oxalic  
103 acid only or a mixture of different organic acids in culture media differing in their trophic  
104 conditions. While *A. niger* is known to produce high amounts of oxalic acid, it is also well  
105 known to produce other LMWOA such as citric acid (32, 35-37). An Ultra-High-Performance  
106 Liquid Chromatography (UHPLC) analysis revealed that in the conditions we tested, *A. niger*  
107 produced oxalic acid, only (Fig. S1A). The absence of other organic acids is not surprising as  
108 the conditions for other LMWOA production are highly specific (e.g. carbon concentration  
109 above 50 g/L carbon and pH < 3; (38, 39) and are not provided in the conditions we tested.  
110 Acidification and the presence of CaOx crystals could also be detected in water yeast agar

111 (WYA) (Fig. S1B). We thus concluded that our *A. niger* strain consistently produced oxalic  
112 acid and acidified the pH of its medium under laboratory growth conditions.

113

#### 114 **Confrontation assays between *A. niger* and selected bacterial strains**

115 We assessed how the presence of oxalotrophic bacteria impacted *A. niger* growth and pH  
116 evolution in different growth media. Two oxalotrophic bacteria (*Cupriavidus necator* and *C.*  
117 *oxalaticus*) and one non-oxalotrophic bacterium (*Pseudomonas putida*) were used in  
118 confrontation assays. In malt agar diluted 10 times (MA 1/10), *A. niger* colonized the entire  
119 Petri dish, including the area in which the bacterial inocula were applied. All three inoculated  
120 bacteria did not survive in the area of interaction with the fungus (Fig. S2A). In Reasoner's 2  
121 agar (R2A), *A. niger* mycelia did not colonize the area beyond the barrier formed by the  
122 bacterial inocula, but some hyphae were still able to grow beyond the bacterial inoculation  
123 zone and develop into microcolonies in the co-culture with *P. putida* (Fig. S2B). In WYA,  
124 mycelial growth was also restricted to the area delimited by the inocula in the co-culture with  
125 the two oxalotrophic bacteria. On the other hand, *P. putida* did not survive the interaction  
126 with the fungus, which instead, colonized the entire plate. Moreover, in WYA medium, which  
127 contained a pH indicator, the acidification of the medium by the fungus grown alone or in co-  
128 culture with the non-oxalotrophic bacterium was clearly visible. In contrast, in the co-cultures  
129 with oxalotrophic bacteria, the pH of the medium did not change. The control over fungal  
130 growth was particularly remarkable in the case of *C. oxalaticus* (Fig. S2C). Given the impact  
131 of the medium on the control of fungal growth, we repeated the confrontation assays in Air-  
132 Liquid Interface (ALI) medium, which is the medium used for differentiation of lung cells  
133 (40). The non-oxalotrophic bacterial model (*P. putida*) acidified the medium when grown  
134 alone, while the oxalotrophic bacteria (*C. necator* and *C. oxalaticus*) did not acidify the  
135 medium (Fig S3A). *C. oxalaticus* was found to not only control mycelial growth but also  
136 inhibit conidia germination (Fig. S3B). Moreover, the presence of *C. oxalaticus* in co-culture  
137 with the fungus stabilized the pH of the culture medium at a neutral pH (Fig. S3C), consistent  
138 with decreased oxalic acid concentration in the medium (Fig. S3D). We therefore conclude  
139 that oxalotrophic bacteria have a significant inhibitory effect on *A. niger* growth in all media  
140 tested.

141

#### 142 **Establishment of a dose-response curve on submerged cultures**

143 In order to obtain evidence that oxalotrophic bacteria control the growth of *A. niger* in an  
144 animal-free lung infection model that is compatible with the 3R principles of animal  
145 experimentation (41), we set up experiments on human bronchial epithelial cell (HBEC)  
146 cultures. We established a dose-response curve for increasing conidial and/or bacterial loads  
147 on HBECs in submerged cultures, to identify the optimal load to perform experiments in  
148 Transwells® and BoC systems. After 24 h, the overall size, shape and integrity of the lung  
149 cells changed at an absolute load of 500 conidia and above. The HBECs shrank in size due to  
150 actin agglomeration. Moreover, from a conidial load of  $\geq 1000$ , fungal growth also had an  
151 adverse effect on tissue integrity (Fig. S4). The same experiment was performed with *C.*  
152 *oxalaticus* and *P. putida*. A strong morphological change was induced by a total load of 500  
153 bacterial cells and above for the former (Fig. S5), and as little as 10 cells for the latter (Fig.  
154 S6), which was not used further. The HBECs co-cultured with *C. oxalaticus* became rounder,  
155 and actin agglomeration increased compared with the cells-only control (Fig. S5).

156 To analyze the effect of co-culturing *A. niger* with the oxalotrophic bacterium on HBECs  
157 integrity, we performed a test with 10 and 500 conidia confronted with 10 bacterial cells.  
158 After 72h, *A. niger* induced morphological changes (size reduction and actin agglomeration),  
159 with a stronger effect for 500 conidia, confirming the results obtained at 24h. With the co-  
160 inoculation of as few as 10 *C. oxalaticus* cells, the morphology of the HBECs was similar to  
161 the morphology of HBECs of the bacteria-only control, suggesting the inhibition of fungal  
162 development (Fig. S7). We concluded that a conidial and bacterial load of 10 conidia/cells  
163 was ideal to monitor the interaction of *A. niger* and *C. oxalaticus* in differentiated HBECs in  
164 Transwells® and BoC systems.

165

### 166 **Biocontrol assay of *A. niger* bronchial cells infection by *C. oxalaticus***

167 After establishing a dose-response curve on HBECs in submerged cultures, the effect of  
168 inoculation of 10 *A. niger* conidia alone or in co-culture with 10 *C. oxalaticus* cells was  
169 assessed in differentiated bronchial tissue in Transwell® inserts and BoC systems. In the  
170 presence of the fungus alone, changes in three key environmental factors were observed: pH,  
171  $\text{Ca}^{2+}$  concentration, and concentration of soluble oxalic acid. The pH dropped significantly  
172 from 7.5 down to 4.5 in Transwells® and from 7.3 to 6.8 in BoC systems (Fig. 3A).  $\text{Ca}^{2+}$   
173 concentrations changed from 1 mM to around 0.2 mM in both culture systems (Fig. 3B). The  
174 level of soluble oxalic acid produced by *A. niger* dropped from 500  $\mu\text{M}$  (cells alone) to 75  $\mu\text{M}$

175 (cells inoculated with the fungus) (Fig. 3C). In contrast, pH, Ca<sup>2+</sup> and free oxalic acid levels  
176 were statistically indistinguishable when oxalotrophic bacteria were co-cultured with the  
177 fungus compared to the controls with lung cells alone or with bacteria. In addition, CaOx  
178 crystals were observed in the cultures in which the fungus developed (Fig. 3D), but not when  
179 the fungus was co-cultured with oxalotrophic bacteria (Fig. 3E). This suggests that the lower  
180 levels of soluble oxalic acid measured in the treatment with the fungus were likely the result  
181 of complexation of oxalic acid and Ca<sup>2+</sup>, and corroborates the pH and Ca<sup>2+</sup> concentration data.  
182 Moreover, the absence of CaOx crystals when the fungus was in co-culture with *C. oxalaticus*  
183 agrees with the pH, Ca<sup>2+</sup> concentration and soluble oxalic concentrations measured. These  
184 results validated our hypothesis that oxalotrophic bacteria can be used to manipulate the  
185 microenvironment created by *A. niger*. In addition to the changes in the environmental  
186 parameters measured above, we also observed a cytopathic effect when conidia of *A. niger*  
187 developed into mycelia (Fig. 4A and B). This cytopathic effect resulted in the destruction of  
188 the bronchial epithelium. Lactate dehydrogenase (LDH) activity were elevated in response to  
189 the presence of the foreign oxalotrophic bacteria (Fig. 4C), something that needs to be  
190 addressed for any future therapeutic application.

191

## 192 **Genomic potential for oxalic acid production in other *Aspergillus* spp.**

193 We performed a genomic screening of orthologous genes to the oxaloacetate acetylhydrolase  
194 (*oahA*) and the oxalate/formate antiporter (genes involved in oxalic acid production in *A.*  
195 *niger*) in genomes available in the *Aspergillus* Genome Database (AspGD). The genomic  
196 screening revealed that orthologs of both genes are found in multiple *Aspergillus* spp. and are  
197 highly conserved across diverse species (Fig. 5). In the case of the orthologs to the  
198 oxalate/formate antiporter, they were conserved to a lesser extent (Fig. S8). This genomic  
199 analysis confirmed that diverse *Aspergillus* spp. possesses the genes necessary to produce and  
200 secrete oxalic acid.

201

## 202 **Discussion**

203 Here we present a biological interaction between *A. niger* and oxalotrophic bacteria that  
204 results in the biological control of *A. niger*, preventing infection in 3D-lung cell tissues  
205 (Transwells® and BoC). The direct consequence of acidification through oxalic acid

206 production by *A. niger* was the decrease in free  $\text{Ca}^{2+}$  and subsequent precipitation of CaOx  
207 crystals. CaOx crystals are well known to occur in lung tissues upon infection by *A. niger* (10,  
208 11, 13). Presumably, by consuming the oxalate produced by *A. niger*, the oxalotrophic  
209 bacterial species *C. oxalaticus* blocks the subsequent decrease in pH and formation of CaOx  
210 crystals observed in the absence of the bacterium. To obtain a direct confirmation of the role  
211 of oxalic acid in the manipulation of pH during lung infection, the use of a non-oxalate-  
212 producer *A. niger* mutant would be indispensable. Such mutants (*oahA* gene) are described in  
213 the literature and exhibited a decreased acidification of the culture medium and reduced  
214 extracellular protease activity (32, 42). After multiple failed attempts to obtain the published  
215 mutants by addressing the corresponding scientific teams, we attempted to construct a non-  
216 oxalate-producer mutant of our *A. niger* strain using CRISPR-Cas9 gene editing. However,  
217 this was unsuccessful due to multiple targets of the sgRNA probes and thus could not be  
218 included in this study.

219 Oxalate-degrading bacteria are known inhabitants of the human gut, where they perform the  
220 key function of degrading dietary oxalate (43). These species have also been used as  
221 probiotics for the treatment of hyperoxaluria (high oxalate in urine) and the management of  
222 kidney stones (43, 44). While oxalate-degrading bacteria are well characterized in the gut, this  
223 is not the case of the lung. Although considered sterile for a long time, the lung is now known  
224 to harbor a diverse microbiota (45, 46). Oxalate-degrading capabilities have been previously  
225 reported in strains of the genera *Lactobacillus* (47), *Streptococcus* (48), *Prevotella* (49, 50)  
226 and *Veillonella* (50), all of which are reported as components of the lung microbiota.  
227 However, assessing the oxalotrophic potential of the lung microbiome is something that still  
228 need to be accomplished.

229 The genomic analysis of multiple *Aspergillus* spp. suggests that oxalotrophy could also be  
230 relevant to other *Aspergillus* causing pulmonary aspergillosis (5). The presence of CaOx  
231 crystals during infection by *A. fumigatus* has been reported in the literature (8, 11, 14, 51).  
232 Accordingly, we found orthologs of the oxaloacetate acetylhydrolase (OAH) and the  
233 oxalate/formate antiporter of *A. niger* in the genomes of two well characterized model *A.*  
234 *fumigatus* strains Af293 and A1163 (52), suggesting the production of oxalic acid by this  
235 pathogen and the potential of using oxalotrophic bacteria in fungal species more relevant for  
236 human health. To conclude, the results presented here represent a stepping stone towards  
237 developing an alternative approach to control the development of oxalate-producing



238 *Aspergillus* spp. based on the manipulation of the lung environment using bacterial:fungal  
239 interactions.

240

## 241 **Materials and Methods**

### 242 **Bacterial and Fungal cultures**

243 All bacterial and fungal strains come from the collection of the Laboratory of Microbiology of  
244 the University of Neuchâtel (LAMUN; Table 1). *P. putida* KT2440 was kindly provided by  
245 Dr. Arnaud Dechesne (Technical University of Denmark). *C. necator* JMP289 was kindly  
246 provided by Prof. Jan van der Meer (University of Lausanne). *C. oxalaticus* Ox1 was tagged  
247 in-house using insertion with a MiniTn7 system. Table 2 summarizes all the media used.  
248 Bacterial strains were routinely cultured on NA medium. *Aspergillus niger* was routinely  
249 cultured on MA medium. PDA was used for *A. niger* conidia production. BHIA was used to  
250 have mycelium-only colony edge without any conidia in order to prevent unwanted conidia  
251 dispersal during confrontations with bacteria.

252

### 253 **LMWOA detection by UHPLC and by colorimetric pH indicator-based Petri dish assay**

254 For the UHPLC analysis, 500 µl of 30 mM H<sub>2</sub>SO<sub>4</sub> were added to 1 mL of a two-week liquid  
255 culture in malt 1/10, Reasoner's 2, and ALI liquid media in triplicate, to obtain 20 mM H<sub>2</sub>SO<sub>4</sub>  
256 final concentration in order to obtain a low pH for the extraction of LMWOAs and to dissolve  
257 any precipitated crystals. The samples were incubated at 60°C for two hours to dissolve  
258 precipitated metal oxalate crystals, and then centrifuged at 3000 g for 10 min. All the samples  
259 were filtered at 0.22 µm (13mm syringe filters, PTFE, hydrophilic) and 200 µl were added  
260 into HPLC vials with 250 µl conical inserts. UHPLC (Ultimate 3000 RS-Dionex, Thermo  
261 Fisher Scientific, USA) was coupled with DAD detector set at 210 ± 2 nm. A 5 µL of sample  
262 was injected onto a Prevail™ organic acid column (5 µm particle size, 150 x 4.6 mm, Grace  
263 Davison Discovery Sciences, USA) with the temperature kept at 40°C. The mobile phase  
264 consisted of 50 mM phosphate buffer adjusted to pH 2.5 with phosphoric acid with a flow rate  
265 of 1 mL/min. Pure oxalic acid (Merck, Germany) was identified by the retention time and was  
266 quantified by an external standard curve, linear regression from five calibration points (0.2 to  
267 5 mg/mL). For the culture-based assay, WYA supplemented with bromocresol purple  
268 (WYA+BP) was used as a pH indicator-containing medium. After one week of incubation at

269 room temperature (RT), the presence of typical bi-pyramidal shaped CaOx crystals was  
270 assessed by observing a thin slice of agar medium sampled at the edge of the colony and  
271 stained with lactophenol cotton blue under a Leica DM4 B optical microscope connected to a  
272 Leica DFC7000 T camera.

273

#### 274 **Confrontation assays on solid media**

275 Confrontations assays were performed between *A. niger* and *P. putida*, *C. necator* and *C.*  
276 *oxalaticus* (Table 1), on three culture media (MA 1/10, R2A and WYA+BP). A plug coming  
277 from the apical part of an actively growing *A. niger* colony was sampled using the wider end  
278 of a Pasteur pipette and inoculated in the center of the plates. The bacterial strains were  
279 inoculated from fresh plates as opposite lines on either side of the fungal inoculum. Plates  
280 were incubated at RT for 20 days, and pictures of the plates at 20 days were taken. Pictures of  
281 the bacterial inocula were taken using a Nikon SMZ18 epifluorescence stereoscope,  
282 connected to a Nikon DS-Ri2 camera, in order to assess the viability of the bacterial strains  
283 thanks to constitutively expressed fluorescent proteins.

284

#### 285 **Growth tests and confrontation assay in Air-Liquid Interface (ALI) medium**

286 Bacterial growth in ALI medium was tested for 3 days at RT. To produce conidial  
287 suspensions, *A. niger* was cultured on PDA for 10 days at RT. Conidia were harvested using  
288 Dulbecco's Phosphate Buffer Saline (DPBS) supplemented with 0.01% (v/v) Tween 80.  
289 Harvested conidia were washed three times with DPBS following centrifugation at 2000xg for  
290 5 min at RT. Finally, conidia were resuspended in 2 mL DPBS and quantified with an  
291 Improved Neubauer counting chamber. Two  $\mu\text{L}$  of 16'000 conidia/bacterial cell per  $\mu\text{L}$   
292 suspensions were inoculated in 200  $\mu\text{L}$  ALI medium. To test mycelial growth in the different  
293 media, small agar plugs (approximately 3x3 mm) coming from the edge of a colony of *A.*  
294 *niger* on BHIA were used. The 96-well plate was incubated at RT for 7 days and growth was  
295 visually assessed.

296 Confrontation of *A. niger* with *C. oxalaticus* was performed in 100-mm Corning® tissue  
297 culture plate containing 12 mL ALI medium to allow the fungus to attach during growth. The  
298 fungal inoculum was taken from the apical part of an active colony grown on BHIA by using  
299 the wider end of a Pasteur pipette. For the confrontation assay, the fungal inoculum was

300 placed in the medium after addition and mixing of 100  $\mu$ L inoculum of an overnight culture of  
301 *C. oxaliticus* in ALI medium. A fungus-only plate was used as control. The plates were  
302 incubated at RT for 7 days. Oxalic acid concentration was quantified by using the Oxalic Acid  
303 Colorimetric Assay Kit (Sigma-Aldrich, Germany), following the manufacturer instructions.

304

### 305 **Preparation and sterilization of the bronchiole-on-a-chip (BoC)**

306 The chip was assembled as described in Hsieh et al. (53). Each unit of the culture platform  
307 was fabricated by using a layer-by-layer stacking technique (54). The devices were designed  
308 using Solid Edge 2D software (ST9, Siemens PLM Software), and each layer of the  
309 prelaminated polymeric sheet was obtained using a CO<sub>2</sub> laser cutter (Universal Laser  
310 System). The prelaminated polymeric sheets were combined with biocompatible adhesive  
311 tapes (9122, 3M Company) with PMMA (1.5 and 3 mm thick) or PET (0.1 and 0.25mm  
312 thick). After cutting, each layer was aligned and assembled using a seam roller to complete  
313 the devices. The culture chip includes a Y-shaped apical and a basal part separated by a  
314 porous PET membrane (pore size = 0.4 $\mu$ m) prepared as described in Arefin *et al.* (55). The  
315 PET membrane was sandwiched between two PET sheets using adhesive transfer tape to  
316 create the cell culture surface. This allows nutrients to pass from the media to the cells  
317 through the porous membrane. The open design of the tissue chip makes cell seeding  
318 procedure easy and accessible.

319 For sterilization, each chip was placed in a 100 mm Petri dish and sterilized with 5% H<sub>2</sub>O<sub>2</sub>  
320 solution for 1 h. The chips were then rinsed 2-3 times with sterile deionized water for 15 min  
321 between each rinse. Once all liquid was removed, the chips were let dry overnight under a  
322 laminar flow hood. The next day, the inlet and outlet of the chip were connected with a sterile  
323 tubing and rinsed 3 more times with sterile deionized water as explained before. After the last  
324 rinse, 200  $\mu$ l sterile DPBS was added in the channel (apical part) and 5 mL in the basolateral  
325 part (bottom part) of the chip, and the chip was placed in a humidified incubator at 37°C with  
326 5% CO<sub>2</sub> overnight. The next morning, peroxide contamination was checked in each chip  
327 using a CG8+ i-STAT cartridge (Abbott, USA). Rinses with sterile deionized water and  
328 overnight incubation with sterile DPBS were repeated until peroxide was no longer detected.

329

### 330 **Primary normal human bronchial epithelial cell culture**

331 Primary normal human bronchial epithelial cells (Lifeline Cell Technology, USA) were  
332 expanded in a T-75 cell culture flask with vent cap (Corning, USA) in BronchiaLife™ B/T  
333 complete medium (Lifeline Cell Technology, USA) supplemented with 0.5% Phenol Red  
334 solution (Sigma-Aldrich, USA, 15 mg/L final concentration) to 70-80% confluence in a  
335 humidified incubator at 37°C with 5% CO<sub>2</sub>. Culture medium was changed every other day.  
336 Cells were used until passage 2 for all experiments. Cells were harvested by trypsinization  
337 with 0.05% Trypsin / 0.02% EDTA (Lifeline Cell Technology, USA), followed by the  
338 addition of Trypsin Neutralizing buffer (Lifeline Cell Technology, USA), and counted using a  
339 hemocytometer after centrifugation at 100xg for 5 min and resuspension of the cell pellet in  
340 BronchiaLife™ medium.

341 Cells were seeded at a density of 3x10<sup>4</sup> cells/well in 200 µl BronchiaLife™ medium for  
342 submerged undifferentiated tissue culture in 96-well plates, and 5x10<sup>4</sup> cells and 8.6x10<sup>4</sup> cells  
343 in 200 µL BronchiaLife™ medium for air-lifted differentiated tissue culture in the apical side  
344 of Transwell® inserts in 24-well plates (Corning, USA) and BoC devices, respectively.  
345 Transwell® inserts and BoC were first coated with collagen (30 µg/mL) prior seeding of the  
346 cells in order to allow proper cell attachment onto the porous membrane, as described in  
347 Arefin *et al.* (55). 600 µL of BronchiaLife™ medium was added to the basolateral side of  
348 Transwell® inserts in the 24-well plates and 3 mL in the basolateral side of the BoC device.  
349 96-well plates, Transwell® inserts, and BoC devices were placed in a humidified incubator at  
350 37°C with 5% CO<sub>2</sub> for 2-3 days until confluence and formation of a monolayer of bronchial  
351 cells. For differentiated bronchial cell tissues (Transwells® and BoCs), cells were shifted to  
352 air-liquid interface by removing carefully the BronchiaLife™ medium from the apical side  
353 and replacing it by Air-Liquid Interface (ALI) Epithelial Differentiation Medium (Lifeline  
354 Cell Technology, USA) supplemented with 0.5% Phenol Red solution (Sigma-Aldrich, USA,  
355 15 mg/L final concentration). The same was done for the medium on the basolateral side.  
356 Finally, the medium on the apical side was removed and the inserts and devices were placed  
357 in a humidified incubator at 37°C with 5% CO<sub>2</sub> for 21 days. Medium was changed every other  
358 day as described previously. The cultures were observed daily using an EVOS™ XL Core  
359 bright field inverted microscope (Thermo Fisher Scientific, USA).

360

361 **Determination of conidial and bacterial load and confrontation assay on submerged**  
362 **undifferentiated bronchial epithelial cell cultures**

363 In order to determine the optimal conidial and bacterial load to be used for confrontation on  
364 bronchial tissue cultures, increasing conidial and bacterial loads were tested to assess their  
365 effect on the morphology of bronchial epithelial cells in submerged cultures. *A. niger* was  
366 cultured on PDA for 7 days at 37°C in order to produce conidia. *A. niger* conidia were then  
367 harvested as already described. Finally, conidia were resuspended in 2 mL DPBS and  
368 quantified with an Improved Neubauer counting chamber. Bacteria were cultured in  
369 BronchiaLife™ medium at 37°C overnight and quantified with an Improved Neubauer  
370 counting chamber. A stock suspension of *A. niger* conidia was made at 10<sup>6</sup> conidia/mL that  
371 was diluted further to obtain suspensions at 5x10<sup>5</sup> to 5x10<sup>3</sup> and 10<sup>3</sup> conidia/mL. The same  
372 was done for *C. oxalaticus* from a stock suspension at 10<sup>5</sup> bacterial cells/mL diluted until 10<sup>3</sup>  
373 bacterial cells/mL. 10 µL of each suspension was added to submerged undifferentiated  
374 bronchial tissue in a 96-well plate in order to have 10<sup>4</sup> to 10 conidia/well (200 µL) for *A.*  
375 *niger*, and 10<sup>3</sup> to 10 bacterial cells/well (200 µL) for *C. oxalaticus*. The plates were placed in  
376 a humidified incubator at 37°C with 5% CO<sub>2</sub> for 24h. For the confrontations assay, cells were  
377 infected with 10 or 500 *A. niger* conidia and were put in confrontation with 10 bacterial cells.  
378 The plate was placed in a humidified incubator at 37°C with 5% CO<sub>2</sub> for 72h. After  
379 incubation, cells were fixed, stained (actin and nucleus), and imaged as described below  
380 (Immunofluorescence staining).

381

### 382 **Confrontations on differentiated bronchial tissues in Transwell® inserts and BoC** 383 **devices**

384 Differentiated bronchial tissues in Transwell® inserts and in BoC devices were infected with  
385 10 µL of 10<sup>3</sup> conidia or bacterial cell to get 10 conidia or bacterial cells. Fungus and bacteria  
386 were co-inoculated for the confrontation and controls with only medium, cells, fungus or  
387 bacteria were included. Each condition was done in triplicate for the Transwell® inserts and  
388 one unique replicate for each condition was done for the BoC devices. All Transwell® inserts  
389 and BoC devices were incubated in a humidified incubator at 37°C with 5% CO<sub>2</sub> for 72h.

390

### 391 **Immunofluorescence staining**

392 Undifferentiated and differentiated bronchial tissues (Transwell® and BoCs) were fixed with  
393 100 µL 4% paraformaldehyde in DPBS for 15 min at RT. Cells were then rinsed 3 times with

394 200  $\mu$ L DPBS, with 2 min waiting time between each rinse. Cells were permeabilized with  
395 100  $\mu$ L 0.5% Triton X-100 in DPBS for 15 min at RT and rinsed 3 times with 200  $\mu$ L DPBS,  
396 with 2 min waiting time between each rinse. After that, cells were blocked with 100  $\mu$ L 3%  
397 BSA in DPBS for 1h at RT. Anti-Mucin 5AC mouse monoclonal antibody (Abcam, USA,  
398 Cat.# ab218466) was prepared in DPBS (1/100). The actin stain (ActinGreen™ 488  
399 ReadyProbes™ Reagent) and the nuclei counterstain (NucBlue™ Live ReadyProbes™  
400 Reagent) were added to the same buffer (2 drops/mL and 1 drop/mL, respectively). Anti-  
401 Aspergillus rabbit polyclonal antibody (Abcam, Cat.# ab20419) was also added (1/200) in the  
402 staining buffer for the conditions where *A. niger* conidia were inoculated. Fixed cells were  
403 incubated with 100  $\mu$ L buffer containing the stains and Anti-Mucin 5AC and Anti-Aspergillus  
404 antibodies overnight at 4°C. The next day, fixed cells were washed 3 times with DPBS and  
405 secondary antibodies were applied. Goat anti-Mouse IgG antibody (1/250) conjugated with  
406 Alexa Fluor 546 (Thermo Fisher Scientific, USA, Cat.# A-11003,) directed against Anti-  
407 Mucin 5AC antibody and Goat anti-Rabbit IgG antibody (1/500) conjugated with Alexa Fluor  
408 594 (Thermo Fisher Scientific, USA, Cat.# A-11012) directed against Anti-Aspergillus  
409 antibody were prepared in DPBS. Fixed cells were incubated with 100  $\mu$ L buffer containing  
410 the secondary antibodies overnight at 4°C. The following day, fixed cells were once again  
411 washed 3 times with DPBS and the membranes from the inserts were carefully cut out with a  
412 sharp knife. The membranes were mounted on a glass slide using Fluoromount-G™  
413 Mounting Medium (Thermo Fisher Scientific, USA) and imaged with a Zeiss Axio Observer  
414 Z1 fluorescence inverted microscope (Carl Zeiss AG, Germany).

415

#### 416 **pH measurements and quantification of calcium, oxalic acid and lactate dehydrogenase** 417 **(LDH)**

418 pH measurements of the culture medium after 72h incubation were done directly after taking  
419 the samples out of the incubator using pH-indicator strips (Merck, Germany) for the  
420 Transwell® inserts samples, and CG8+ i-STAT cartridges for the BoC devices, as the pH  
421 change of the culture medium indicator was less visible. Free calcium (Calcium Colorimetric  
422 Assay, Sigma-Aldrich, Germany), free oxalic acid (Oxalic Acid Colorimetric Assay Kit), and  
423 LDH (ScienCell Research Laboratories, USA) were quantified in the culture medium using  
424 colorimetric assay kits following the manufacturer instructions.

425

426 **Statistical analyses**

427 Statistical significance of the data from the confrontations on differentiated bronchial tissues  
428 in Transwell® inserts (3 replicates, n = 3) was tested with unpaired two-tailed Student t-tests  
429 in Microsoft® Excel (Version 16.37). The statistical significance threshold was set to 5%.

430 **Acknowledgments**

431 We would like to thank Diego Gonzales and Ted Turlings for critical review of the paper, and  
432 Pulak Nath from the Materials Physics and Applications Division of the Los Alamos National  
433 Laboratory for providing the equipment and laboratory infrastructure for the BoC devices  
434 fabrication. BoC devices were developed under Defense Threat Reduction Agency (DTRA)  
435 interagency agreement CBMXCEL-XL1-2-0001. **Funding:** This work was supported by the  
436 Novartis Foundation (FreeNovation program), the Gebert R uf Stiftung (Grant agreement  
437 GRS-064/18) and the U.S. Department of Energy, Office of Science, Biological and  
438 Environmental Research Division, under award number LANLF59T. **Data and materials**  
439 **availability:** All data is available in the main text or the supplementary materials.

440

441 **Conflict of interests**

442 Authors declare no conflict of interests.

443



## 444 **References**

- 445 1. Fisher MC, Gurr SJ, Cuomo CA, Blehert DS, Jin H, Stukenbrock EH, et al. Threats  
446 posed by the fungal kingdom to humans, wildlife, and agriculture. *mBio*. 2020;11(3).
- 447 2. Bongomin F, Gago S, Oladele RO, Denning DW. Global and multi-national  
448 prevalence of fungal diseases—estimate precision. 2017.
- 449 3. Ramirez-Ortiz ZG, Means TK. The role of dendritic cells in the innate recognition of  
450 pathogenic fungi (*A. fumigatus*, *C. neoformans* and *C. albicans*). 2012. p. 635-46.
- 451 4. Fisher MC, Hawkins NJ, Sanglard D, Gurr SJ. Worldwide emergence of resistance to  
452 antifungal drugs challenges human health and food security. 2018. p. 739-42.
- 453 5. Brown GD, Denning DW, Gow NAR, Levitz SM, Netea MG, White TC. Hidden  
454 killers: Human fungal infections. 2012. p. 165rv13-rv13.
- 455 6. Brunke S, Mogavero S, Kasper L, Hube B. Virulence factors in fungal pathogens of  
456 man. 2016. p. 89-95.
- 457 7. Pfaller MA, Diekema DJ. Rare and emerging opportunistic fungal pathogens: Concern  
458 for resistance beyond *Candida albicans* and *Aspergillus fumigatus*. 2004. p. 4419-31.
- 459 8. Kousha M, Tadi R, Soubani AO. Pulmonary aspergillosis: A clinical review. 2011. p.  
460 156-74.
- 461 9. Paulussen C, Hallsworth JE, Álvarez-Pérez S, Nierman WC, Hamill PG, Blain D, et  
462 al. Ecology of aspergillosis: insights into the pathogenic potency of *Aspergillus fumigatus* and  
463 some other *Aspergillus* species. *Microbial Biotechnology*. 2017;10(2):296-322.
- 464 10. Kurrein F, Path FRC, Green GH, Rowles SL. Localized deposition of calcium oxalate  
465 around a pulmonary *Aspergillus niger* fungus ball. *American Journal of Clinical Pathology*.  
466 1975;64(4):556-63.
- 467 11. Maeno T, Sasaki M, Shibue Y, Mimura K, Oka H. Calcium oxalate in the sputum may  
468 aid in the diagnosis of pulmonary aspergillosis: A report of two cases. *Medical Mycology*  
469 *Case Reports*. 2015;8:32-6.
- 470 12. Muntz FHA. Oxalate-producing pulmonary aspergillosis in an alpaca. *Veterinary*  
471 *Pathology*. 1999;36(6):631-2.
- 472 13. Oda M, Saraya T, Wakayama M, Shibuya K, Ogawa Y, Inui T, et al. Calcium oxalate  
473 crystal deposition in a patient with Aspergilloma due to *Aspergillus niger*. *Journal of thoracic*  
474 *disease*. 2013;5(4):E174-8.
- 475 14. Payne CL, Dark MJ, Conway JA, Farina LL. A retrospective study of the prevalence  
476 of calcium oxalate crystals in veterinary *Aspergillus* cases. *Journal of Veterinary Diagnostic*  
477 *Investigation*. 2017;29(1):51-8.
- 478 15. Yi Y, Cho SY, Lee DG, Jung JI, Park YJ, Lee KY. Invasive Pulmonary Aspergillosis  
479 Due to *Aspergillus awamori*: Role of Calcium Oxalate Crystal Precipitation Mimicking  
480 Mucormycosis. 2020. p. 409-11.

- 481 16. Cessna SG, Sears VE, Dickman MB, Low PS. Oxalic acid, a pathogenicity factor for  
482 *Sclerotinia sclerotiorum*, suppresses the oxidative burst of the host plant. *Plant Cell*.  
483 2000;12(11):2191-9.
- 484 17. Schoonbeek H-j, Jacquat-Bovet A-C, Mascher F, Métraux J-P. Oxalate-degrading  
485 bacteria can protect *Arabidopsis thaliana* and crop plants against *Botrytis cinerea*. *Molecular*  
486 *plant-microbe interactions*. 2007;20(12):1535-44.
- 487 18. Lehner A, Meimoun P, Errakhi R, Madiona K, Barakate M, Bouteau F. Toxic and  
488 signalling effects of oxalic acid. *Canadian Journal of Microbiology*. 2008;3(September):746-  
489 8.
- 490 19. Dutton MV, Evans CS. Oxalate production by fungi: its role in pathogenicity and  
491 ecology in the soil environment. *Canadian Journal of Microbiology*. 1996;42(9):881-95.
- 492 20. Palmieri F, Estoppey A, House GL, Lohberger A, Bindschedler S, Chain PSG, et al.  
493 Oxalic acid, a molecule at the crossroads of bacterial-fungal interactions. In: Gadd GM,  
494 Sariaslani S, editors. 106: Academic Press; 2019. p. 49-77.
- 495 21. de Oliveira Ceita G, Macêdo JNA, Santos TB, Alemanno L, da Silva Gesteira A,  
496 Micheli F, et al. Involvement of calcium oxalate degradation during programmed cell death in  
497 *Theobroma cacao* tissues triggered by the hemibiotrophic fungus *Moniliophthora perniciosa*.  
498 *Plant Science*. 2007;173(2):106-17.
- 499 22. Graustein WC, Cromack K, Sollins P. Calcium oxalate: Occurrence in soils and effect  
500 on nutrient and geochemical cycles. *Science*. 1977;198(4323):1252-4.
- 501 23. Martin G, Guggiari M, Bravo D, Zopfi J, Cailleau G, Aragno M, et al. Fungi, bacteria  
502 and soil pH: The oxalate-carbonate pathway as a model for metabolic interaction.  
503 *Environmental Microbiology*. 2012;14(11):2960-70.
- 504 24. Hofmann BA, Bernasconi SM. Review of occurrences and carbon isotope  
505 geochemistry of oxalate minerals: implications for the origin and fate of oxalate in diagenetic  
506 and hydrothermal fluids. *Chemical Geology*. 1998;149(1-2):127-46.
- 507 25. Certini G, Corti G, Ugolini FC. Vertical trends of oxalate concentration in two soils  
508 under *Abies alba* from Tuscany (Italy). *Journal of Plant Nutrition and Soil Science*.  
509 2000;163(2):173-7.
- 510 26. Braissant O, Cailleau G, Aragno M, Verrecchia EP. Biologically induced  
511 mineralization in the tree *Milicia excelsa* (Moraceae): its causes and consequences to the  
512 environment. *Geobiology*. 2004;2(1):59-66.
- 513 27. Rudnick MB, van Veen JA, de Boer W. Oxalic acid: A signal molecule for fungus-  
514 feeding bacteria of the genus *Collimonas*? *Environmental Microbiology Reports*.  
515 2015;7(5):709-14.
- 516 28. Mela F, Fritsche K, De Boer W, Van Veen JA, De Graaff LH, Van Den Berg M, et al.  
517 Dual transcriptional profiling of a bacterial/fungal confrontation: *Collimonas fungivorans*  
518 versus *Aspergillus niger*. *ISME Journal*. 2011;5(9):1494-504.

- 519 29. Haq IU, Zwahlen RD, Yang P, van Elsas JD. The Response of *Paraburkholderia terrae*  
520 Strains to Two Soil Fungi and the Potential Role of Oxalate. *Frontiers in Microbiology*.  
521 2018;9(989).
- 522 30. Dethlefsen L, McFall-Ngai M, Relman DA. An ecological and evolutionary  
523 perspective on human-microbe mutualism and disease. *Nature*. 2007;449(7164):811-8.
- 524 31. Schuster E, Dunn-Coleman N, Frisvad J, Van Dijck P. On the safety of *Aspergillus*  
525 *niger* - A review. 2002. p. 426-35.
- 526 32. Ruijter GJG, van de Vondervoort PJI, Visser J. Oxalic acid production by *Aspergillus*  
527 *niger*: an oxalate-non-producing mutant produces citric acid at pH 5 and in the presence of  
528 manganese. *Microbiology*. 1999;145(9):2569-76.
- 529 33. Cameselle C, Bohlmann JT, Núñez MJ, Lema JM. Oxalic acid production by  
530 *Aspergillus niger*. *Bioprocess Engineering*. 1998;19(4):247-52.
- 531 34. Person AK, Chudgar SM, Norton BL, Tong BC, Stout JE. *Aspergillus niger*: An  
532 unusual cause of invasive pulmonary aspergillosis. *Journal of Medical Microbiology*.  
533 2010;59(7):834-8.
- 534 35. Plassard C, Fransson P. Regulation of low-molecular weight organic acid production  
535 in fungi. 2009. p. 30-9.
- 536 36. Show PL, Oladele KO, Siew QY, Aziz Zakry FA, Lan JCW, Ling TC. Overview of  
537 citric acid production from *Aspergillus niger*. 2015. p. 271-83.
- 538 37. Sturm EV, Frank-Kamenetskaya O, Vlasov D, Zelenskaya M, Sazanova K, Rusakov  
539 A, et al. Crystallization of calcium oxalate hydrates by interaction of calcite marble with  
540 fungus *Aspergillus Niger*. *American Mineralogist*. 2015;100(11-12):2559-65.
- 541 38. Karaffa L, Kubicek CP. *Aspergillus niger* citric acid accumulation: do we understand  
542 this well working black box? *Appl Microbiol Biotechnol*. 2003;61(3):189-96.
- 543 39. Kobayashi K, Hattori T, Honda Y, Kirimura K. Oxalic acid production by citric acid-  
544 producing *Aspergillus niger* overexpressing the oxaloacetate hydrolase gene *oahA*. *J Ind*  
545 *Microbiol Biotechnol*. 2014;41(5):749-56.
- 546 40. Fulcher ML, Gabriel S, Burns KA, Yankaskas JR, Randell SH. Well-differentiated  
547 human airway epithelial cell cultures. *Methods in molecular medicine*. 2005;107:183-206.
- 548 41. Kendall LV, Owiny JR, Dohm ED, Knapek KJ, Lee ES, Kopanke JH, et al.  
549 Replacement, Refinement, and Reduction in Animal Studies With Biohazardous Agents.  
550 *ILAR journal*. 2018;59(2):177-94.
- 551 42. Han Y, Joosten HJ, Niu W, Zhao Z, Mariano PS, McCalman M, et al. Oxaloacetate  
552 hydrolase, the C-C bond lyase of oxalate secreting fungi. *Journal of Biological Chemistry*.  
553 2007;282(13):9581-90.
- 554 43. Abratt VR, Reid SJ. Oxalate-degrading bacteria of the human gut as probiotics in the  
555 management of kidney stone disease. 72: Academic Press; 2010. p. 63-87.

- 556 44. Hoppe B, Von Unruh G, Laube N, Hesse A, Sidhu H, editors. Oxalate degrading  
557 bacteria: New treatment option for patients with primary and secondary  
558 hyperoxaluria?2005/11//.
- 559 45. Enaud R, Prevel R, Ciarlo E, Beaufils F, Wieërs G, Guery B, et al. The Gut-Lung Axis  
560 in Health and Respiratory Diseases: A Place for Inter-Organ and Inter-Kingdom Crosstalks.  
561 2020.
- 562 46. Mitchell AB, Oliver BGG, Glanville AR. Translational aspects of the human  
563 respiratory virome. 2016. p. 1458-64.
- 564 47. Turrone S, Vitali B, Bendazzoli C, Candela M, Gotti R, Federici F, et al. Oxalate  
565 consumption by lactobacilli: Evaluation of oxalyl-CoA decarboxylase and formyl-CoA  
566 transferase activity in *Lactobacillus acidophilus*. *Journal of Applied Microbiology*.  
567 2007;103(5):1600-9.
- 568 48. Miller AW, Dearing D. The metabolic and ecological interactions of oxalate-  
569 degrading bacteria in the mammalian gut. 2013. p. 636-52.
- 570 49. Ticinesi A, Nouvenne A, Chiussi G, Castaldo G, Guerra A, Meschi T. Calcium  
571 oxalate nephrolithiasis and gut microbiota: Not just a gut-kidney axis. a nutritional  
572 perspective. 2020.
- 573 50. Suryavanshi MV, Bhute SS, Jadhav SD, Bhatia MS, Gune RP, Shouche YS.  
574 Hyperoxaluria leads to dysbiosis and drives selective enrichment of oxalate metabolizing  
575 bacterial species in recurrent kidney stone endures. *Scientific Reports*. 2016;6(1).
- 576 51. Pabuççuoğlu U. Aspects of oxalosis associated with aspergillosis in pathology  
577 specimens. *Pathology Research and Practice*. 2005;201(5):363-8.
- 578 52. Bertuzzi M, van Rhijn N, Krappmann S, Bowyer P, Bromley MJ, Bignell EM. On the  
579 lineage of *Aspergillus fumigatus* isolates in common laboratory use. *Medical Mycology*.  
580 2020:myaa075-myaa.
- 581 53. Hsieh HL, Nath P, Huang JH. Multistep Fluidic Control Network toward the  
582 Automated Generation of Organ-on-a-Chip. *ACS Biomaterials Science and Engineering*.  
583 2019;5(9):4852-60.
- 584 54. Lin CK, Hsiao YY, Nath P, Huang JH. Aerosol delivery into small anatomical airway  
585 model through spontaneous engineered breathing. *Biomicrofluidics*. 2019;13(4):044109-.
- 586 55. Arefin A, McCulloch Q, Martinez R, Martin SA, Singh R, Ishak OM, et al.  
587 Micromachining of Polyurethane Membranes for Tissue Engineering Applications. *ACS*  
588 *Biomaterials Science and Engineering*. 2018;4(10):3522-33.
- 589 56. Nelson KE, Weinel C, Paulsen IT, Dodson RJ, Hilbert H, Martins dos Santos VAP, et  
590 al. Complete genome sequence and comparative analysis of the metabolically versatile  
591 *Pseudomonas putida* KT2440. *Environmental Microbiology*. 2002;4(12):799-808.
- 592 57. Sentchilo V, Czechowska K, Pradervand N, Minoia M, Miyazaki R, Van Der Meer  
593 JR. Intracellular excision and reintegration dynamics of the ICE<sub>clc</sub> genomic island of  
594 *Pseudomonas knackmussii* sp. strain B13. *Molecular Microbiology*. 2009;72(5):1293-306.

- 595 58. Şahin N, Işık K, Tamer AÜ, Goodfellow M. Taxonomic position of 'Pseudomonas  
596 oxalaticus' strain Ox1(T) (DSM 110(T)) (Khambata and Bhat, 1953) and its description in the  
597 genus Ralstonia as Ralstonia oxalatica comb, nov. Systematic and Applied Microbiology.  
598 2000;23(2):206-9.
- 599 59. Imeria Ferro K. The impact of oxalogenic plants on soil carbon dynamics - formation  
600 of a millennium carbon storage as calcium carbonate. Neuchâtel: University of Neuchâtel;  
601 2012.
- 602 60. Reasoner DJ, Geldreich EE. A new medium for the enumeration and subculture of  
603 bacteria from potable water. Applied and Environmental Microbiology. 1985;49(1):1-7.
- 604

## 605 **Figure legends**

606 **Fig. 1. Schematic summary of the proposed strategy to control *Aspergillus niger***  
607 **infection by introducing oxalotrophic bacteria to modify the *A. niger* environmental**  
608 **niche.** (A) *A. niger* conidia (depicted in dark grey) arrive in the respiratory system through  
609 breathing. (B) During a normal infection process in a susceptible host, *A. niger* modifies the  
610 environment by secreting oxalic acid (or oxalate  $\text{Ox}^{2-}$ ) which decreases pH and chelates free  
611 calcium in the form of CaOx (depicted in light grey) crystals. This results in the infection of  
612 the host's tissue. (C) The biocontrol strategy proposed here takes advantage of the ability of  
613 oxalotrophic bacteria (cells depicted in red) to consume CaOx and thus reestablish  
614 physiological pH and free calcium concentrations.

615

616 **Fig. 2. Comparison of the growth of *Aspergillus niger* (An) alone and in confrontation**  
617 **with *Cupriavidus oxalaticus* (Co) in different culture media.** The red line next to each  
618 picture represents the extent of *A. niger* growth. On MA 1/10 (A), there is no significant  
619 growth inhibition of *A. niger*, as it kills *C. oxalaticus*. *A. niger* growth is highly restricted to  
620 the center of the plate when co-cultured with *C. oxalaticus* on R2A (B). The growth inhibition  
621 of *A. niger* when co-cultured with *C. oxalaticus* is less pronounced on WYA + BP. Moreover,  
622 the presence of *C. oxalaticus* revert the pH of the medium to a neutral value (C). A yellow  
623 color indicates an acidic pH <6.

624

625 **Fig. 3. Influence of the interaction between *Aspergillus niger* and the oxalotrophic**  
626 **bacterium *Cupriavidus oxalaticus* on environmental parameters of differentiated**  
627 **bronchial tissue in Transwell® inserts and bronchiole-on-a-chip (BoC) devices.** In the  
628 presence of the fungus, the pH (A) decreases, as compared to all other treatments. This pH  
629 decrease is correlated with a drastic decrease in the concentration of free  $\text{Ca}^{2+}$  (B) ( $p$ -value  
630 between C and C+F =  $8,951 \times 10^{-7}$ ). Free oxalic acid concentrations were lower in the  
631 presence of the fungus, compared with the basal level secreted by the bronchial cells (C) ( $p$ -  
632 value between C and C+F =  $4,587 \times 10^{-8}$ ). These results are supported by the detection of  
633 CaOx crystals in the presence of the fungus (D). In the co-culture with the oxalotrophic  
634 bacterium, pH, free  $\text{Ca}^{2+}$  and free oxalic acid concentrations return to physiological levels,  
635 and this was concomitant with the absence of crystals (E) ( $p$ -values between C+F and C+F+B

636 for free  $\text{Ca}^{2+}$  and free oxalic acid = 0,002 and  $1,415 \times 10^{-7}$ , respectively). C: lung cells; C+F:  
637 lung cells + fungus; C+B: lung cells + bacteria; C+F+B: lung cells + fungus + bacteria. For A,  
638 B, C, the results represent the mean + sd of three independent measurements for the  
639 Transwell® inserts for each condition (three biological replicates, n = 3). For A, pH results  
640 for the BoC devices represent a unique measurement per condition (one replicate, n = 1). For  
641 B and C,  $\text{Ca}^{2+}$  and oxalic acid results for the BoC devices represents the mean + sd of two  
642 measurements per condition (one replicate).

643

644 **Fig. 4. Cytopathic effect of *Aspergillus niger* on differentiated bronchial tissue and**  
645 **lactate dehydrogenase (LDH) measurements of the co-culture between *A. niger* and**  
646 ***Cupriavidus oxalaticus* in Transwell® inserts and bronchiole-on-a-chip (BoC) devices.**

647 (A) Control showing healthy differentiated bronchial epithelial cells. (B) Bronchial epithelial  
648 cells infected with *A. niger*. (C) LDH leakage was measured as a proxy for cell damage. In the  
649 presence of the fungus, no LDH has been detected, probably because of the destruction of the  
650 tissue by *A. niger* (B). *C. oxalaticus* cause significantly more LDH leakage than the basal  
651 LDH level of control cells (p-value = 0,004). C: lung cells; C+F: lung cells + fungus; C+B:  
652 lung cells + bacteria; C+F+B: lung cells + fungus + bacteria. For C, the results represent the  
653 mean + sd of three independent measurements for the Transwell® inserts for each condition  
654 (three biological replicates, n = 3). LDH results for the BoC devices represents the mean + sd  
655 of three measurements per condition (one replicate, n = 1).

656

657 **Fig. 5. Genomic screening of the oxaloacetate acetylhydrolase (OAH) in other**  
658 ***Aspergillus* spp.** Multiple sequence alignment of the protein sequences orthologous to the  
659 OAH of *A. niger* CBS 513.88 (GenBank accession number CAD99195.1) revealed they were  
660 well conserved across diverse species, as indicated by an intense purple color of the amino  
661 acids. Multiple sequence alignments were performed using the MUSCLE protein alignment  
662 algorithm in Jalview (version 2.11.1.2). An = *A. niger* CBS 513.88, ATET = *A. terreus*  
663 NIH2624, AFL2T = *A. flavus* NRRL 3357, Afu = *A. fumigatus* Af293, AFUB = *A. fumigatus*  
664 A1163, NFIA = *Neosartorya fisheri* NRRL 181 (formerly *A. fisheri*).

665

666 **Tables**

667 **Table 1. Bacterial and fungal strains used**

| <b>Code</b> | <b>Strain #</b> | <b>Species</b>                    | <b>Fluorescent tag</b> | <b>References</b> |
|-------------|-----------------|-----------------------------------|------------------------|-------------------|
| <b>Pp</b>   | NEU 1264        | <i>Pseudomonas putida</i> KT2440  | GFP                    | (56)              |
| <b>Cn</b>   | NEU 1286        | <i>Cupriavidus necator</i> JMP289 | GFP                    | (57)              |
| <b>Co</b>   | NEU 1287        | <i>Cupriavidus oxalaticus</i> Ox1 | mCherry                | (58)              |
| <b>An</b>   | NEU M8          | <i>Aspergillus niger</i>          | -                      | (59)              |

668 All the bacterial and fungal strains used in this study come from the collection of the  
 669 Laboratory of Microbiology of the University of Neuchâtel.

670

671 **Table 2. Culture media recipes**

| <b>Medium</b>                           | <b>Composition</b>                                                                                                                                                                               | <b>References</b> |
|-----------------------------------------|--------------------------------------------------------------------------------------------------------------------------------------------------------------------------------------------------|-------------------|
| <b>ALI</b> (Air-Liquid Interface)       | 1:1 of DMEM/F12 (Cat.# 11320033, Thermo Fisher Scientific) and LHC Basal Medium (Cat.# 12677019, Thermo Fisher Scientific)                                                                       | (40)              |
| <b>BHIA</b> (Brain Heart Infusion Agar) | 37 g Brain Heart Broth (Sigma-Aldrich, Darmstadt, Germany), 15 g agar (Biolife Italiana, Milano, Italy), per liter of deionized (DI) water                                                       |                   |
| <b>MA</b> (Malt Agar)                   | 12 g of malt extract (Sios Homebrewing GmbH, Wald, Switzerland), 15 g agar (Biolife Italiana, Milano, Italy), per liter of deionized (DI) water                                                  |                   |
| <b>MA 1/10</b>                          | 1.2 g of malt extract (Sios Homebrewing GmbH, Wald, Switzerland), 15 g agar (Biolife Italiana, Milano, Italy), per liter of deionized (DI) water<br><br>For liquid malt 1/10, no agar was added. |                   |
| <b>NA</b> (Nutrient Agar)               | 23 g NA (Carl Roth, Karlsruhe, Germany), per liter of deionized (DI) water                                                                                                                       |                   |



---

|                                    |                                                                                                                                                                                                                                                      |      |
|------------------------------------|------------------------------------------------------------------------------------------------------------------------------------------------------------------------------------------------------------------------------------------------------|------|
| <b>PDA</b> (Potato Dextrose Agar)  | 39 g PDA (Carl Roth, Karlsruhe, Germany), per liter of deionized (DI) water                                                                                                                                                                          |      |
| <b>R2A</b> (Reasoner's 2 Agar)     | 0.5 g yeast extract, 0.5 g Bacto Peptone, 0.5 g casamino acids, 0.5 g glucose, 0.5 g soluble starch, 0.3 g Na-pyruvate, 0.3 g K <sub>2</sub> HPO <sub>4</sub> , 0.05 g MgSO <sub>4</sub> · 7H <sub>2</sub> O, 15 g agar, per liter of Milli-Q® water | (60) |
|                                    | For liquid R2 medium, no agar was added.                                                                                                                                                                                                             |      |
| <b>WYA + BP</b> (Water Yeast Agar) | 1 g K <sub>2</sub> HPO <sub>4</sub> , 5 g NaCl, 0.1 g yeast extract, 10 mg bromocresol purple, 20 g agar, per liter of Milli-Q® water                                                                                                                | (28) |

---

672

673 **Figures**

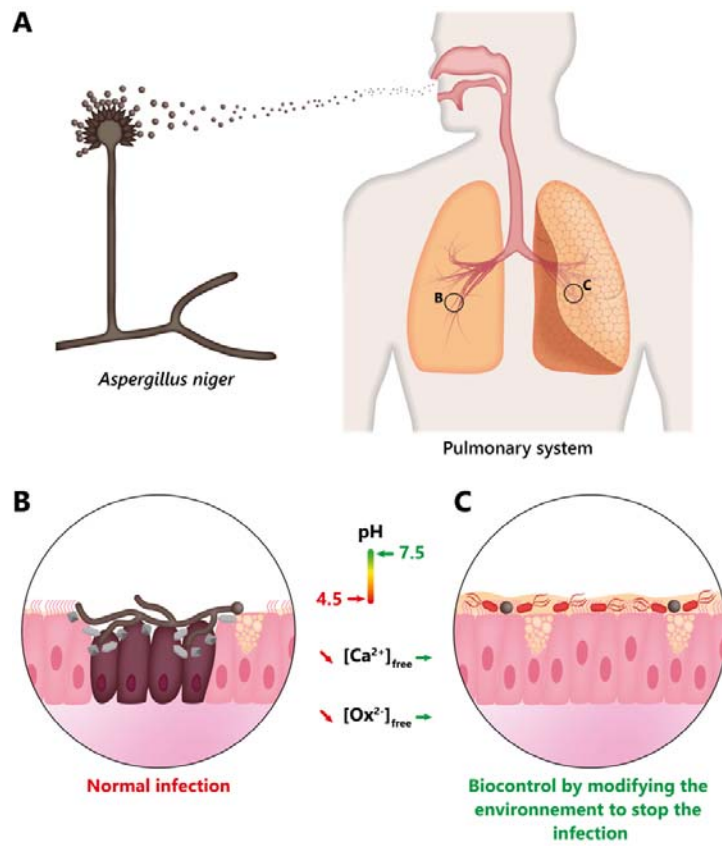

674

675 **Fig. 1.**

676

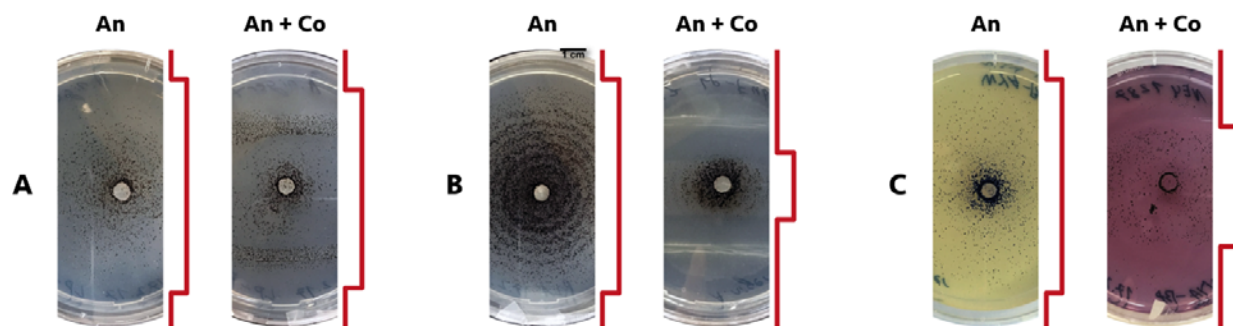

677

678 **Fig. 2.**

679

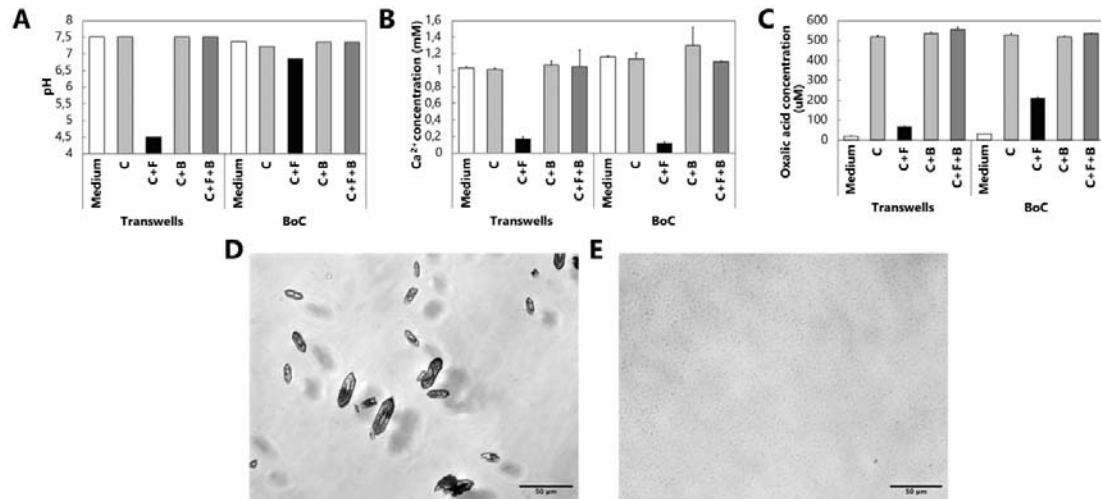

680

681 **Fig. 3.**

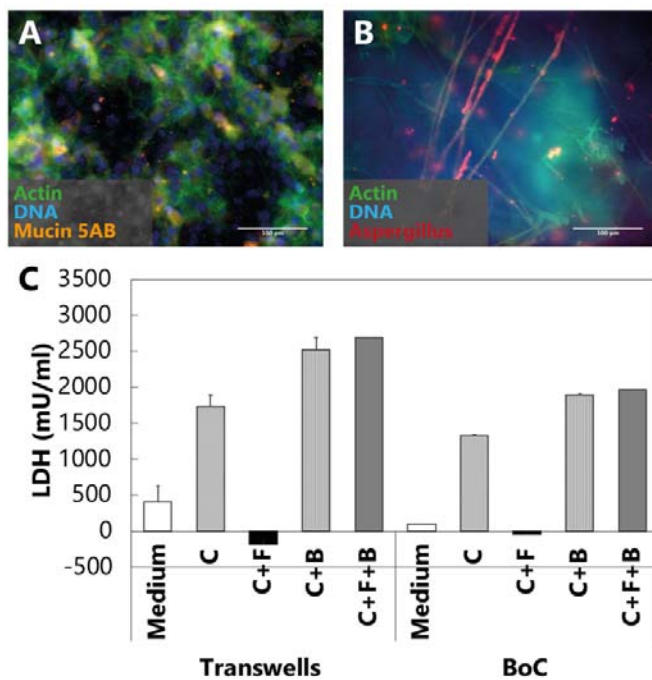

682

683 **Fig. 4.**

10 20 30 40 50 60 70 80 90 100

```

An10g00820/1-342 MKVDT PDSAST I SMTNT I TITVEQDGY I E I N G A R Q E P V V N L M V T G S K L R R K Q R E T N E L L C P G V Y D G L S A R I A I N L G K M Y M T G A G T T A S R L R G M A D L G
ATET_09284/1-339 --- MKVDEGP I N A S D I A I T I T V E K D G Y V E N G R H E P S V S V H M L T G A K L R R K Q R E S N E L I V C P G V Y D G L S A R I A I N L G K M Y M T G A G T T A S R L R G M A D L G
AFL2T_05949/1-337 --- MKVGDSS S S N L A I T I T V E K D G Y E V N G T R Q E P T V S L Y M T A G S K L R R M R E T D D L I V C P G V Y D G L S A R I A M G L G K M Y M T G A G T T A S R L R G M A D L G
Afu2g00540/1-327 ----- M S I T I T V E K D G Y E V N G E S R E P T V N L Y M I A G A T K L R R Y R D T D E L I V C P G V Y D G L S A R I A M Q L G R A L Y M T G A G T T A S R L R G M A D L G
AFUB_017600/1-327 ----- M S I T I T V E K D G Y E V N G E S R E P T V N L Y M I A G A T K L R R Y R D T D E L I V C P G V Y D G L S A R I A M Q L G R A L Y M T G A G T T A S R L R G M A D L G
NFA_032730/1-327 ----- M S I T I T V E K D G Y E V N G E S R E P T I S L Y M I A G A T K L R K Y R D T D E L I V C P G V Y D G L S A R I A M Q L G R A L Y M T G A G T T A S R L R G M A D L G
NFA_080620/1-307 ----- M P I V T A A T A L R R S E D L K S F I W A P G V Y D G L S A R I A L S V G D A L Y M T G A G T A A S V H Q A D L G
Afu2g03820/1-307 ----- M P I V T A A T A L R R S E D P K S F T W A P G V Y D G L S A R I A L S V G D A L Y M T G A G T A A S V H Q A D L G
AFUB_020890/1-307 ----- M P I V T A A T A L R R S E D P K S F T W A P G V Y D G L S A R I A L S V G D A L Y M T G A G T A A S V H Q A D L G
AFL2T_01407/1-323 ----- M P M V T A A G L R R T E D P N S F V W A P G V Y D G L S A R I A L S V G D A L Y M T G A G T A A S V H Q A D L G
An07g08390/1-304 ----- M P M V T A A S L R R A E N P D S F I W A P G V Y D G L S A R V L S A G D A L Y M T G A G T A A S V H Q A D L G
ATET_09508/1-303 ----- M V L S A A T K L R R T E D P Q S F I A A P G V Y D G L S A R I A L S V G D A L Y M T G A G T A A S V H Q A D L G
    
```

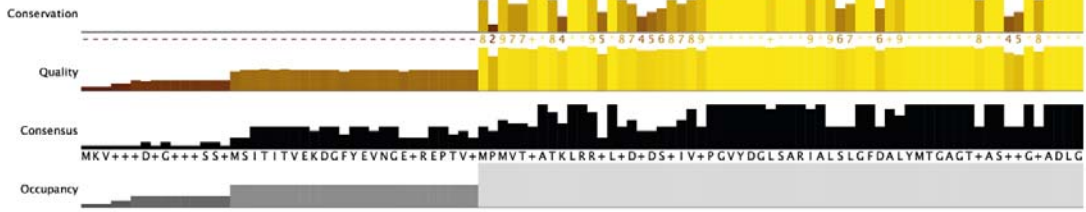

110 120 130 140 150 160 170 180 190 200

```

An10g00820/1-342 LAH I Y D M K T N A E M I A N L D F G P P L A D M D T G Y G G L M V A R S V Q Q Y I Q A G V A G F H I E D Q I Q N K R C G H L A G K R V V T M D E L T R I R A A K T K D R L R S D I V L I A R
ATET_09284/1-339 LAQ I H D M R N A E M I A N L D F G P P L A D M D T G Y G G L M V A K S V Q Q Y I Q A G V A G F H I E D Q I Q N K R C G H L A G K A V V S L D E V L T R I R A A K T K D R L R S D I V L I A R
AFL2T_05949/1-337 LAQ I Y D M R T N A E M I A N L D F G P P L A D M D T G Y G G L M V S K S V Q Q Y I Q A G V A G F H I E D Q I Q N K R C G H L A G K K V V D L E E V L T R I R A A K T K D R L R S D I V L I A R
Afu2g00540/1-327 LAQ I Y D M R T N A E M I A N L D F G P P L A D M D T G Y G G L M V A K S V Q Q Y I Q A G V A G F H I E D Q I Q N K R C G H L A G K K V V S M D E V L T R I R A A K T K D R L R S D I V L I A R
AFUB_017600/1-327 LAQ I Y D M R T N A E M I A N L D F G P P L A D M D T G Y G G L M V A K S V Q Q Y I Q A G V A G F H I E D Q I Q N K R C G H L A G K K V V S M D E V L T R I R A A K T K D R L R S D I V L I A R
NFA_032730/1-327 LAQ I Y D M R T N A E M I A N L D F G P P L A D M D T G Y G G L M V A K S V Q Q Y I Q A G V A G F H I E D Q I Q N K R C G H L A G K K V V S M D E V L T R I R A A K T K D R L R S D I V L I A R
NFA_080620/1-307 I C T I N D M R A N A E M L A N I S P - S T P V I A D A D T G Y G G I M V A R T T E Q Y A R S G V A F H I E D Q V Q T K R C G H L A G K I L V D K E T V S R I R A A V Q A R K R M G S D I V V I A R
Afu2g03820/1-307 I C T I N D M R A N A E M L A N I S P - S T P V I A D A D T G Y G G I M V A R T T E Q Y S R S G V A A F H I E D Q V Q T K R C G H L A G K I L V D K E T V S R I R A A V Q A R K R M G S D I V V I A R
AFUB_020890/1-307 I C T I N D M R A N A E M L A N I S P - S T P V I A D A D T G Y G G I M V A R T T E Q Y S R S G V A A F H I E D Q V Q T K R C G H L A G K I L V D K E T V S R I R A A V Q A R K R M G S D I V V I A R
AFL2T_01407/1-323 I C T I N D M R A N A E M L S N L S P - T T P V I A D A D T G Y G G I M V A R T T E Q Y S R S G V A A F H I E D Q V Q T K R C G H L G K I L V D T D T V T R I R A A V Q A R Q I G S D I V V I A R
An07g08390/1-304 I C T I N D M R A N A E M I S N I S P - S T P V I A D A D T G Y G G I M V A R T T E Q Y S R S G V A A F H I E D Q V Q T K R C G H L A G K I L V D T D T V T R I R A A V Q A R Q I G S D I V V I A R
ATET_09508/1-303 I C T I N D M R A N A E M L A N E S P - S V P V I A D A D T G Y G G I M V A R T T E Q Y A R S G V A F H I E D Q V Q T K R C G H L G K I L V D A A T F V T R I R A A V Q A R Q I G S D I V V I A R
    
```

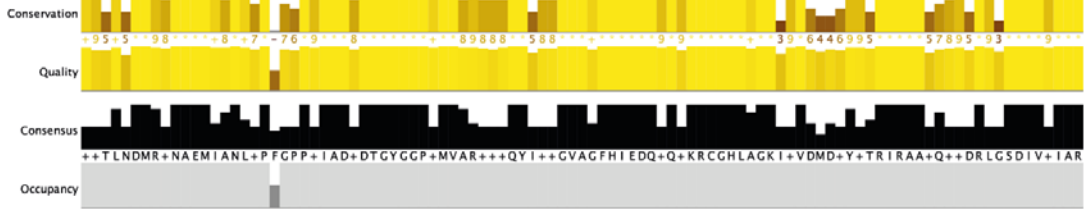

210 220 230 240 250 260 270 280 290 300

```

An10g00820/1-342 T D A L Q Q H G Y D E C I R R L K A A R D L G A D V G L L E G F T S K E M A R R C V Q D L A P W P L L N M V E N G A G P V I S V D E A R E M G F R I M I F S F A C I T P A Y M G T A X L E R L K K D E
ATET_09284/1-339 T D A L Q Q H G Y D E C I R R L K A A R D L G A D V G L L E G F T S K E M A R Q A V Q D L A P W P L L N M V E N G A G P V I T T E A K E M G F R I M I F S F A S L A P A Y L G I K A A L E R L N T K E
AFL2T_05949/1-337 T D A L Q Q H G Y D E C I R R L K A A R D L G A D V G L L E G F T S K E M A R Q A V Q D L A P W P L L N M V E N G A G P V I T T K E A Q E M G F R I M I F S F A C T P A Y L G I K A A L E R L N E E
Afu2g00540/1-327 T D A L Q Q H G Y D E C I R R L K A A R D L G A D V G L L E G F T S K E M A R Q A V Q D L A P W P L L N M V E N G A G P V I T T K E A K E M G F R I M I F S F A S L A P A Y L G I K S A L E R L N E E
AFUB_017600/1-327 T D A L Q Q H G Y D E C I R R L K A A R D L G A D V G L L E G F T S K E M A R Q A V Q D L A P W P L L N M V E N G A G P V I T T K E A K E M G F R I M I F S F A S L A P A Y L G I K S A L E R L N E E
NFA_032730/1-327 T D A L Q Q H G Y D E C I R R L K A A R D I G A D V G L L E G F T S K E M A R Q A V Q D L A P W P L L N M V E N G A G P V I T T K E A K D M G F R I M I F S F A S L A P A Y L G I R S A L E R L N E E
NFA_080620/1-307 T D A L Q Q H G Y E E S V A R L R A A R D A G A D V G L L E G I T S K E M A R Q V Q D L A P W P L L N M V E H G A T P S S A D E A K E M G F R I I I F P F A I G P A L T A I R E G M E K L R R D E
Afu2g03820/1-307 T D A L Q Q G Y G Y E E S V A R L R A A R D A G A D V G L L E G I T S K E M A R Q V Q D L A P W P L L N M V E H G A T P S S A D E A K E M G F R I I I F P F A I G P A L T A I R E G M E K L R R D E
AFUB_020890/1-307 T D A L Q Q G Y G Y E E S V A R L R A A R D A G A D V G L L E G I T S K E M A R Q V Q D L A P W P L L N M V E H G A T P S S A D E A K E M G F R I I I F P F A I G P A L T A I R E G M E K L R R D E
AFL2T_01407/1-323 T D S L Q T H G Y E E S V A R L R A A R D A G A D V G L L E G I T S K E M A R Q V Q D L A P W P L L N M V E H G A T P S S A A E A K E M G F R I I I F P F A L G P A C A A M R E A M E K L R A D E
An07g08390/1-304 T D S L Q T H G Y E E S V A R L R A A R D A G A D V G L L E G I T S R E M A R Q I D D L A G W P L L N M V E H G A T P S S A A E A K E M G F R I I I F P F A L G P A V A A M R E A M E K L R R D E
ATET_09508/1-303 T D A L Q Q L D E E S V A R L R A A R D A G A D V G L L E G I T S R E Q A R R V M A L A P W P L L N M V E H G A T P S T A A E A R E M G F R V V I Y P F A I G P A V Q A R I R E G M E K L R R D E
    
```

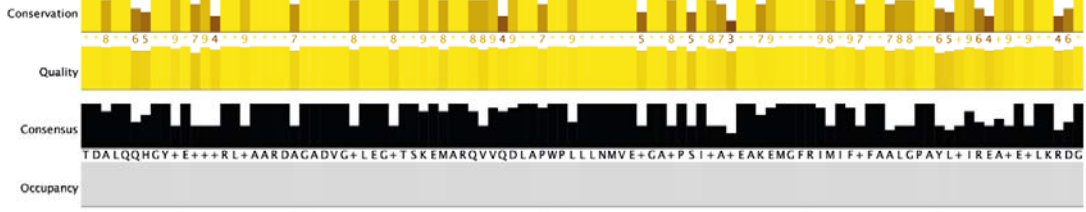

310 320 330 340 350 360

```

An10g00820/1-342 V V G L P E G M G P K K L E V C G L M D S V R V D T A G G D C T A N G V *
ATET_09284/1-339 V V G T P E N V G P K K L E V C G L M E S V H I D T N A G G S C F A N G V *
AFL2T_05949/1-337 V V G I P D G L G P K K L E V C G L M D S M K I D T E A G G S G F T N G V *
Afu2g00540/1-327 I T G I P E G L G P K K L E V C G L M D S V R I D T E A G G D G T N G V *
AFUB_017600/1-327 I T G I P E G L G P K K L E V C G L M D S V R I D T E A G G D C T N G V *
NFA_032730/1-327 I T G I P E G L G P K K L E V C G L M D S M K I D T E A G G D G T N G V *
NFA_080620/1-307 L P G L S K E L T P Q M L F R T C G L D E S L K V D A I A G G A A I Q G G V L D E K E *
Afu2g03820/1-307 L P G L S K E L T P Q M L F R T C G L D E S L K V D A I A G G A A I Q G G V L D E T *
AFUB_020890/1-307 L P G L S K E L T P Q M L F R T C G L D E S L K V D A I A G G A A I Q G G V L D E K E *
AFL2T_01407/1-323 I P G L S K E L T P Q M L F R V C G L D E S I K V D A I A G G A A I E G G V D L K Y F I S S T I P V C K S N E Y S E G G *
An07g08390/1-304 I P G L D K E M T P Q M L F R V C G L D E S M K V D A I A G G A A I D G G V D L K *
ATET_09508/1-303 I P G L D K E M T P Q M L F R V C G L D E S V K V D E I A G G A S E G G V D L *
    
```

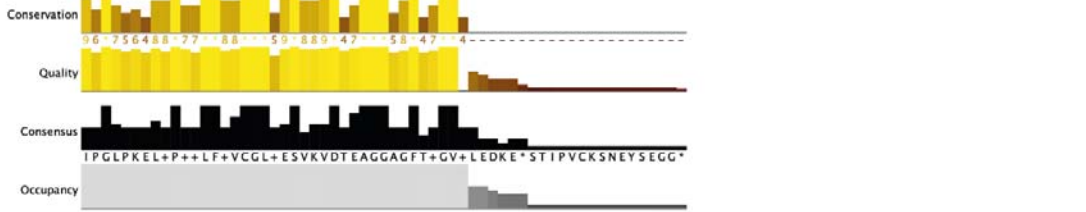

685 **Fig. 5.**

**A**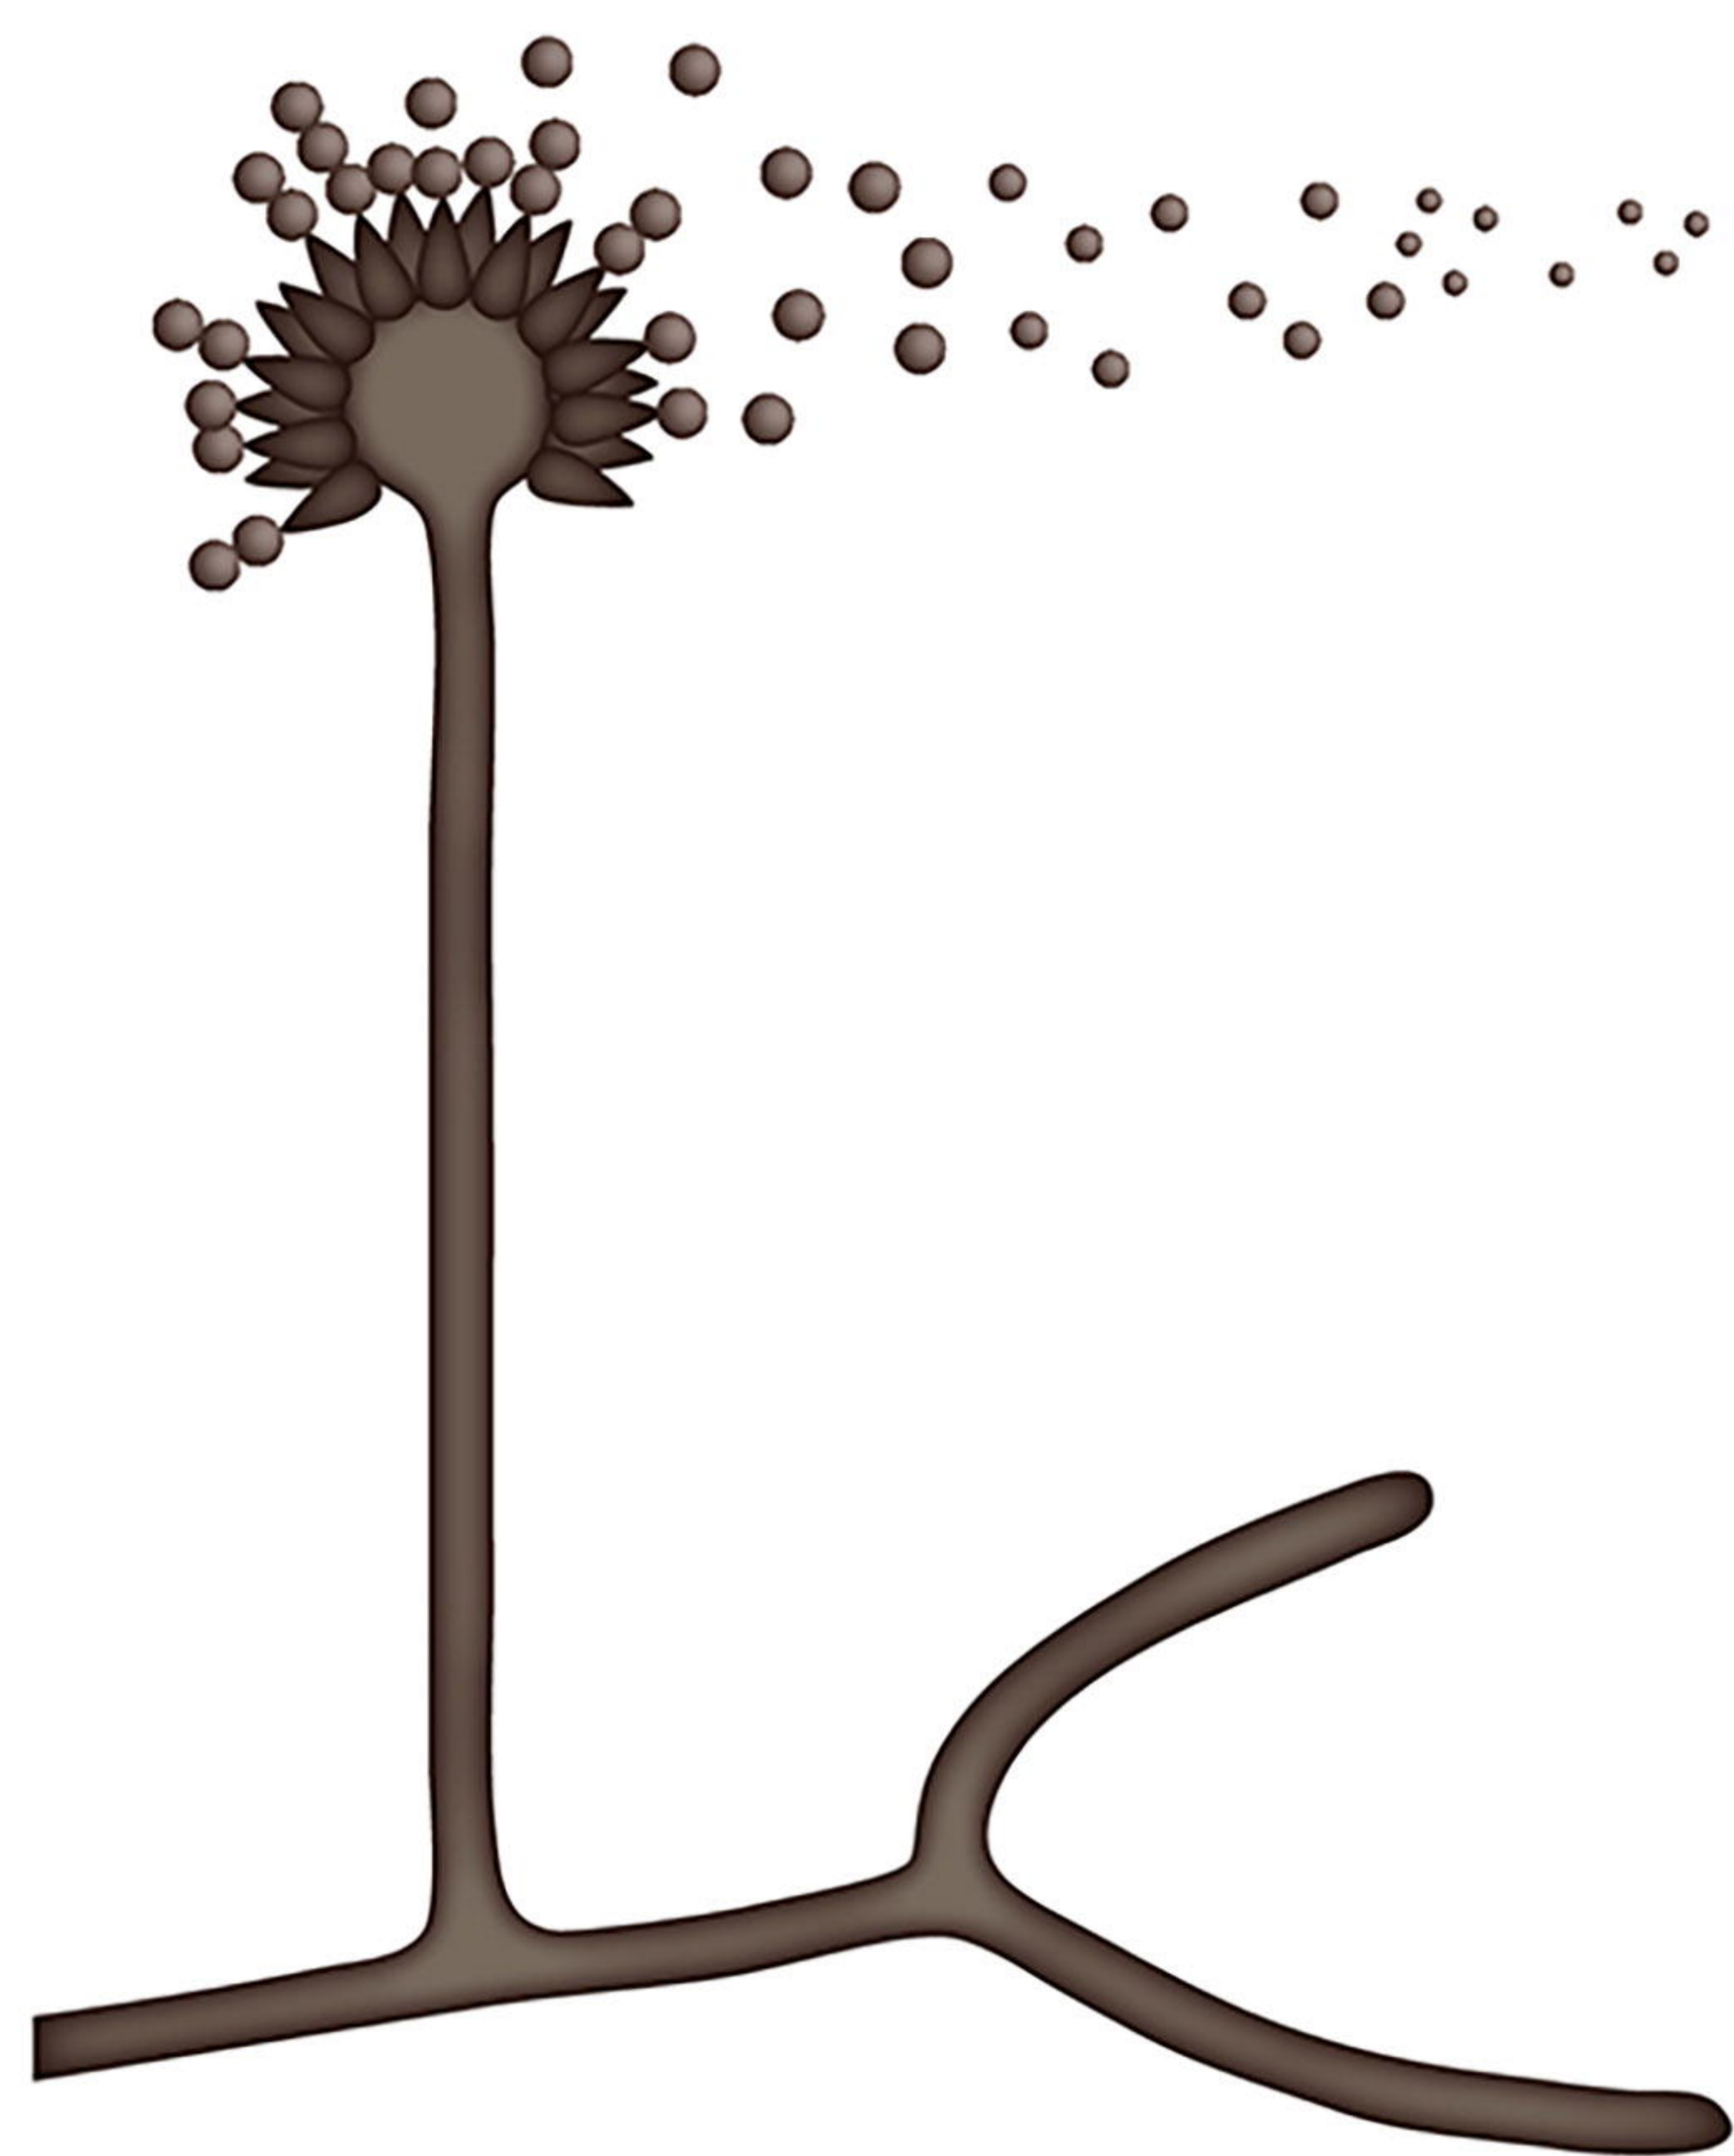*Aspergillus niger*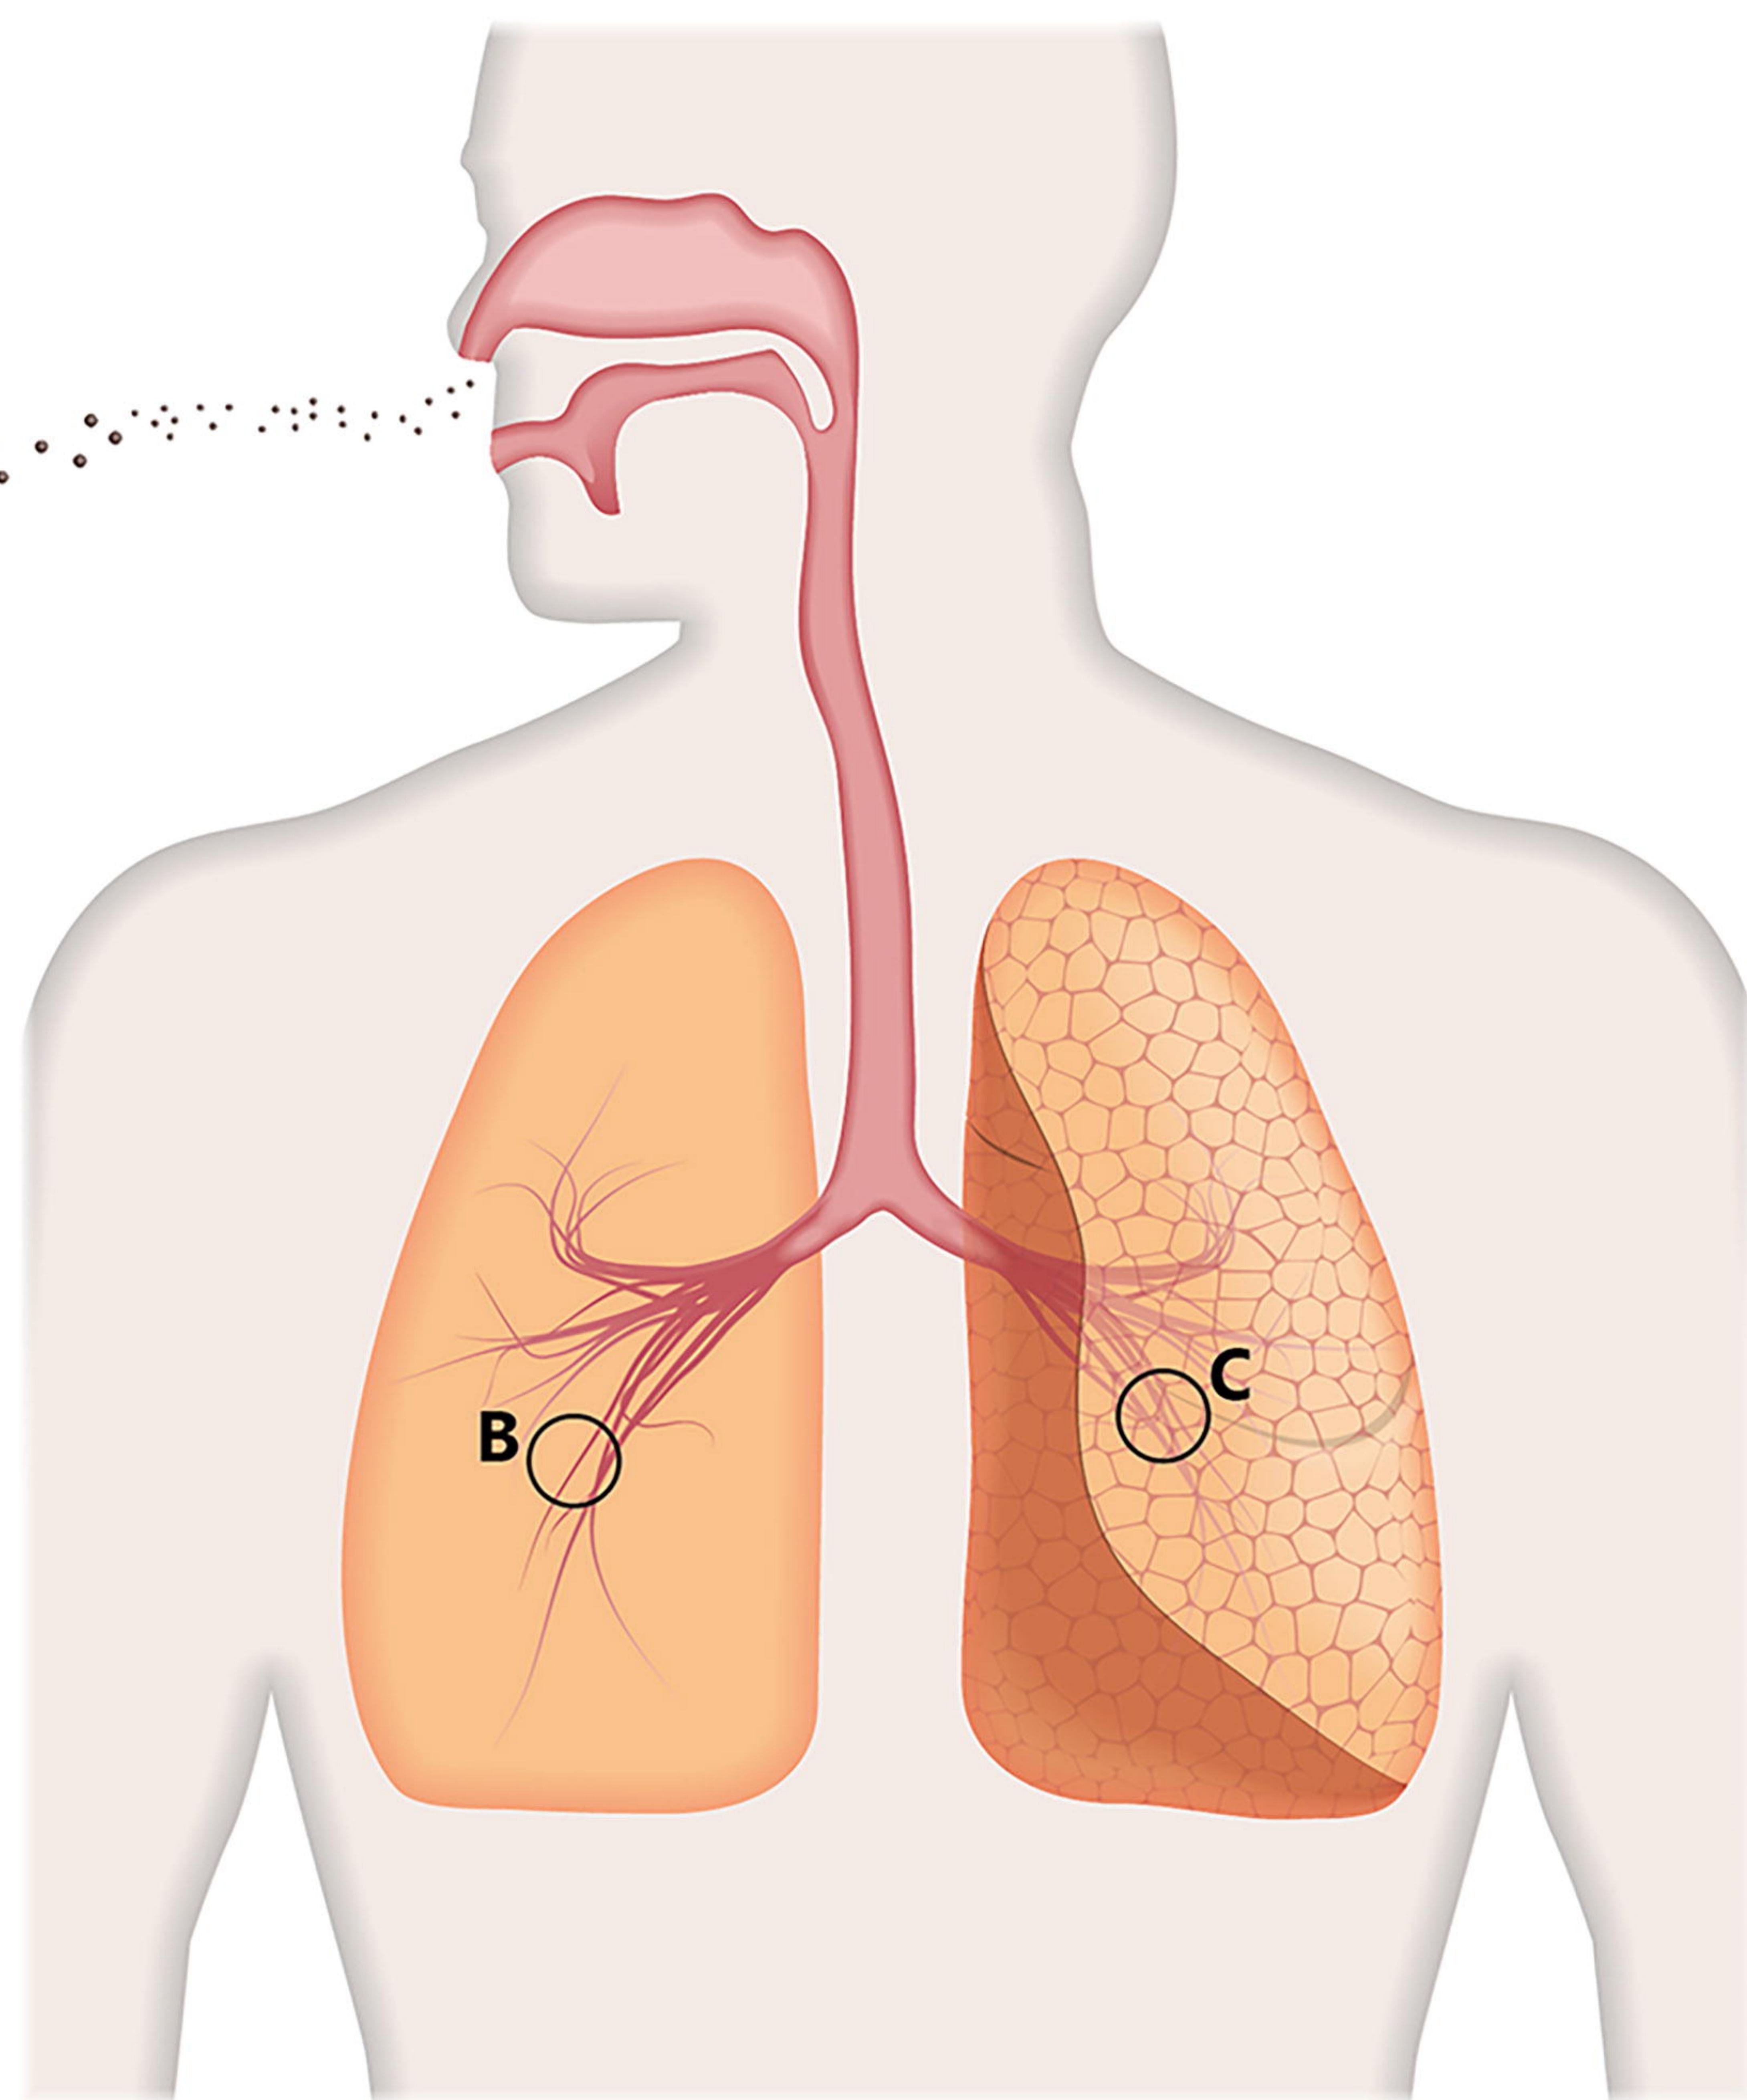

Pulmonary system

**B**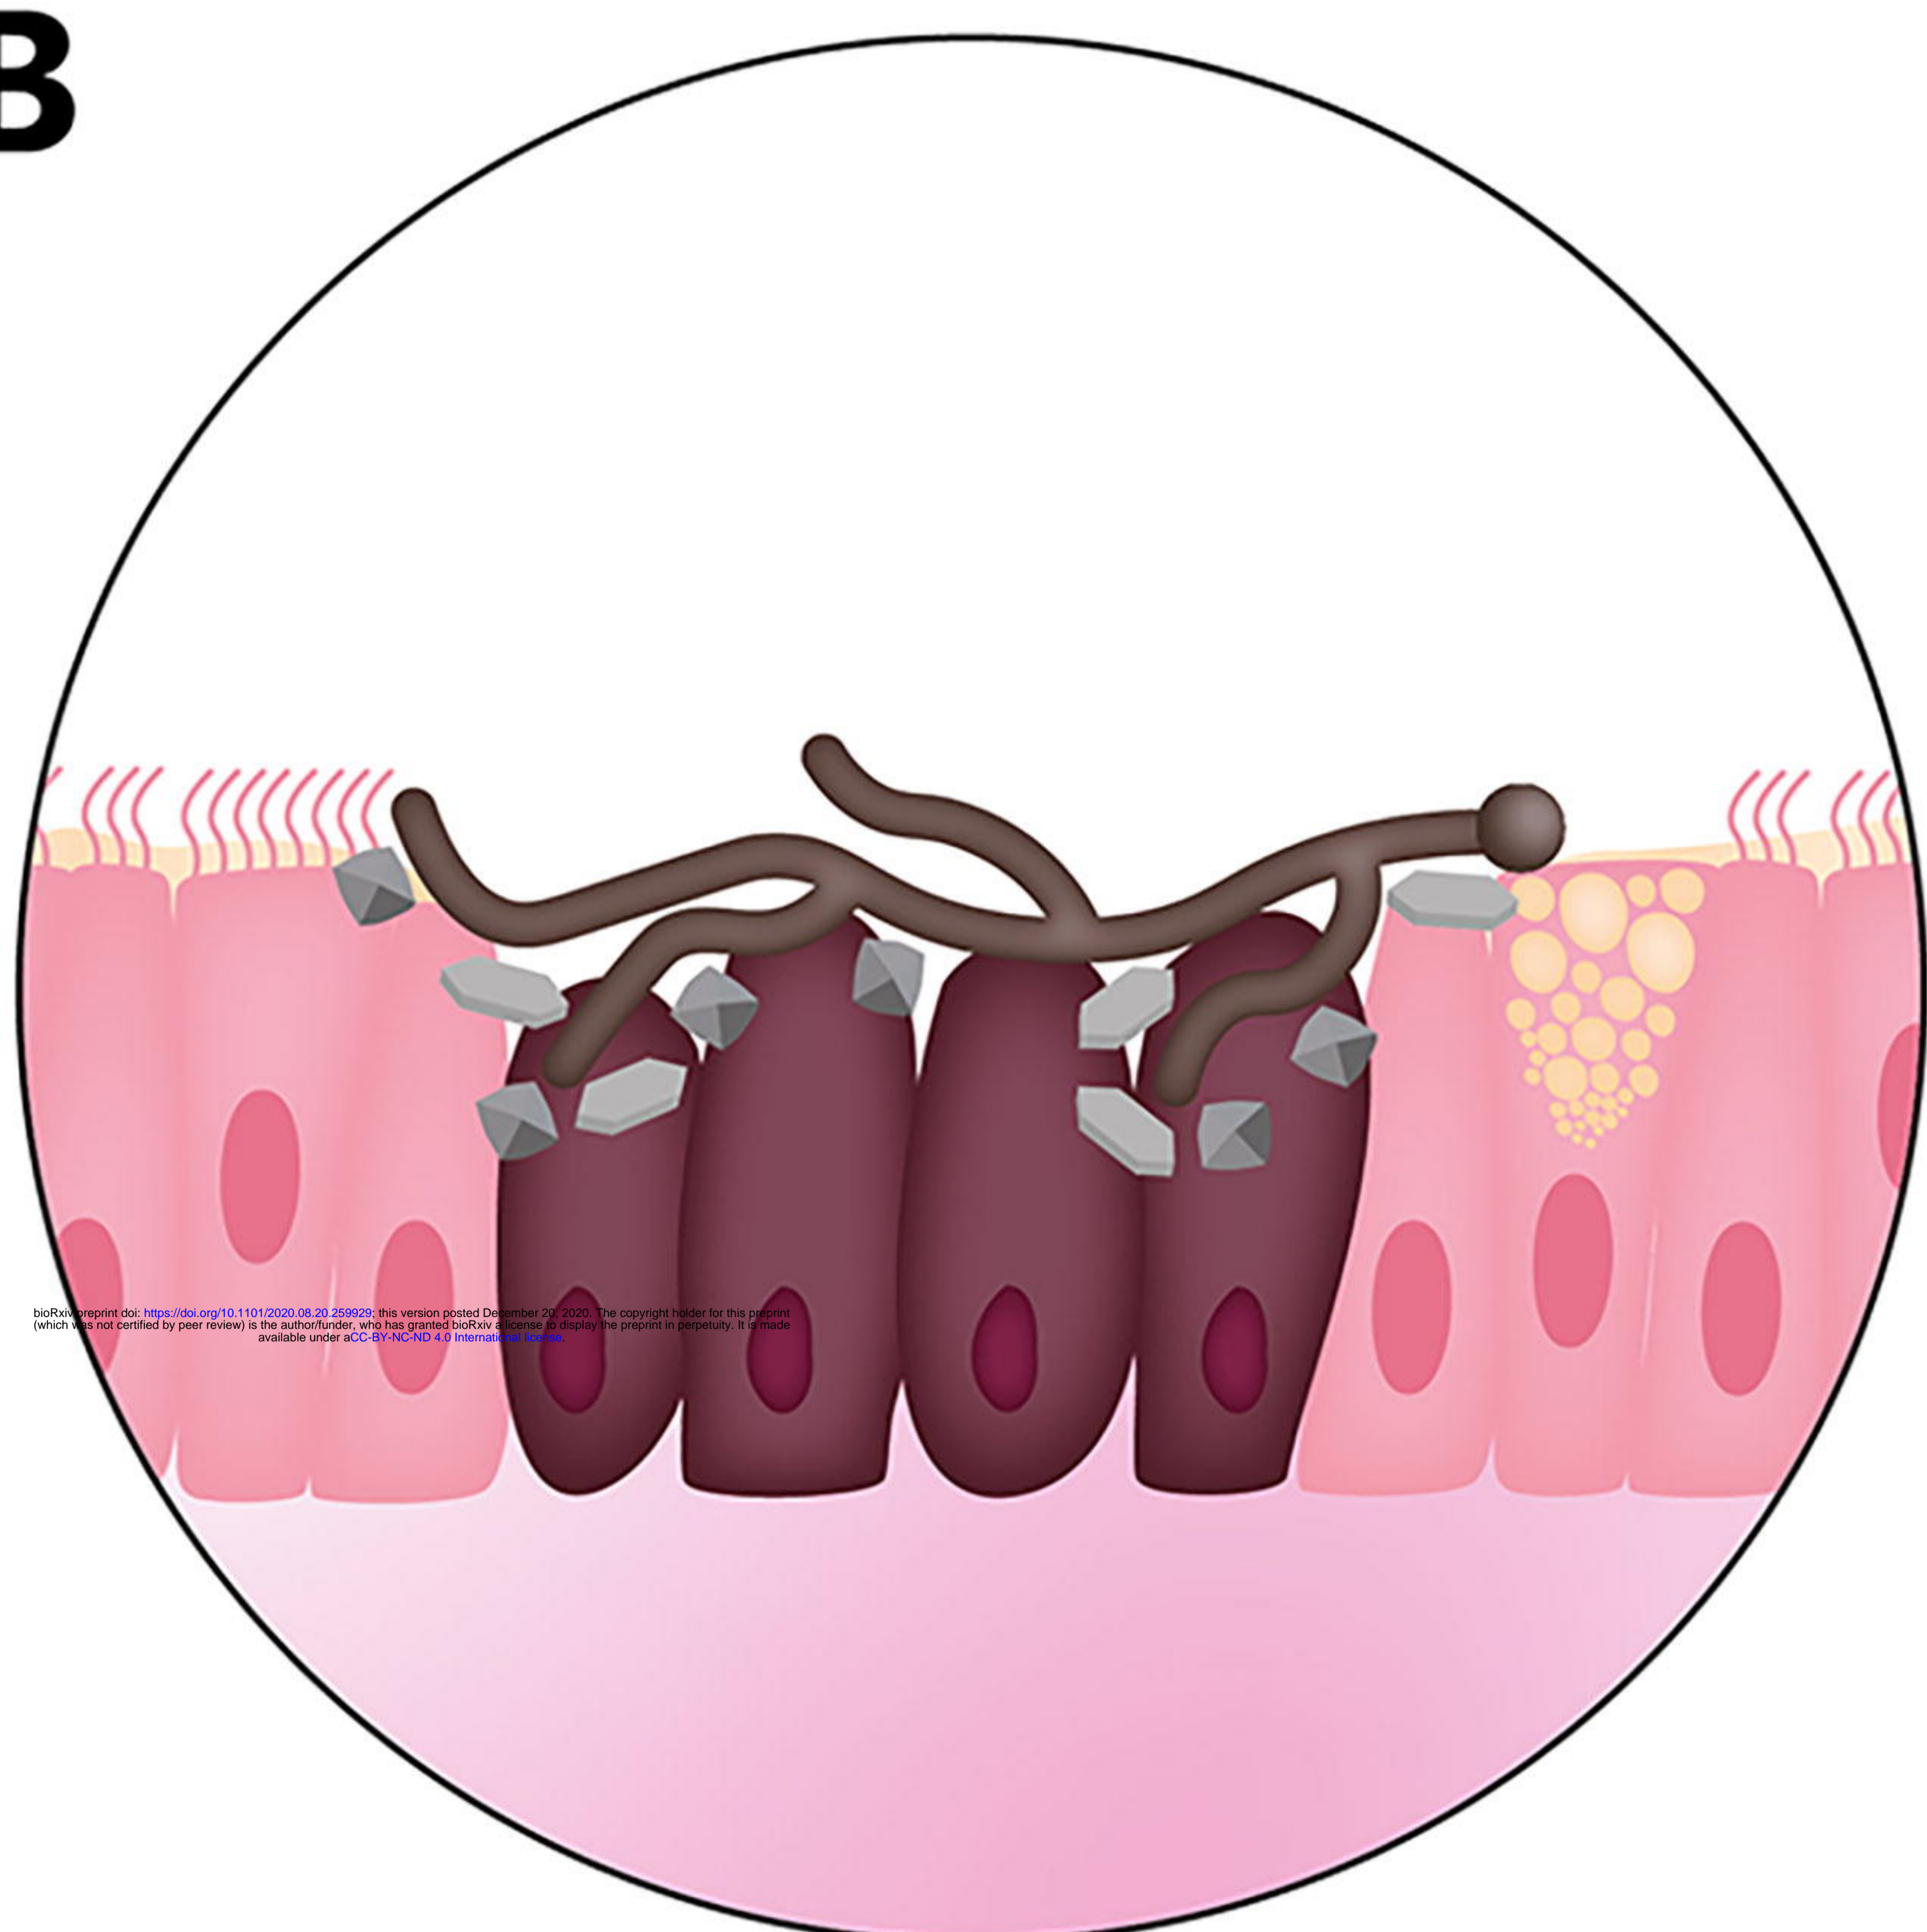**Normal infection**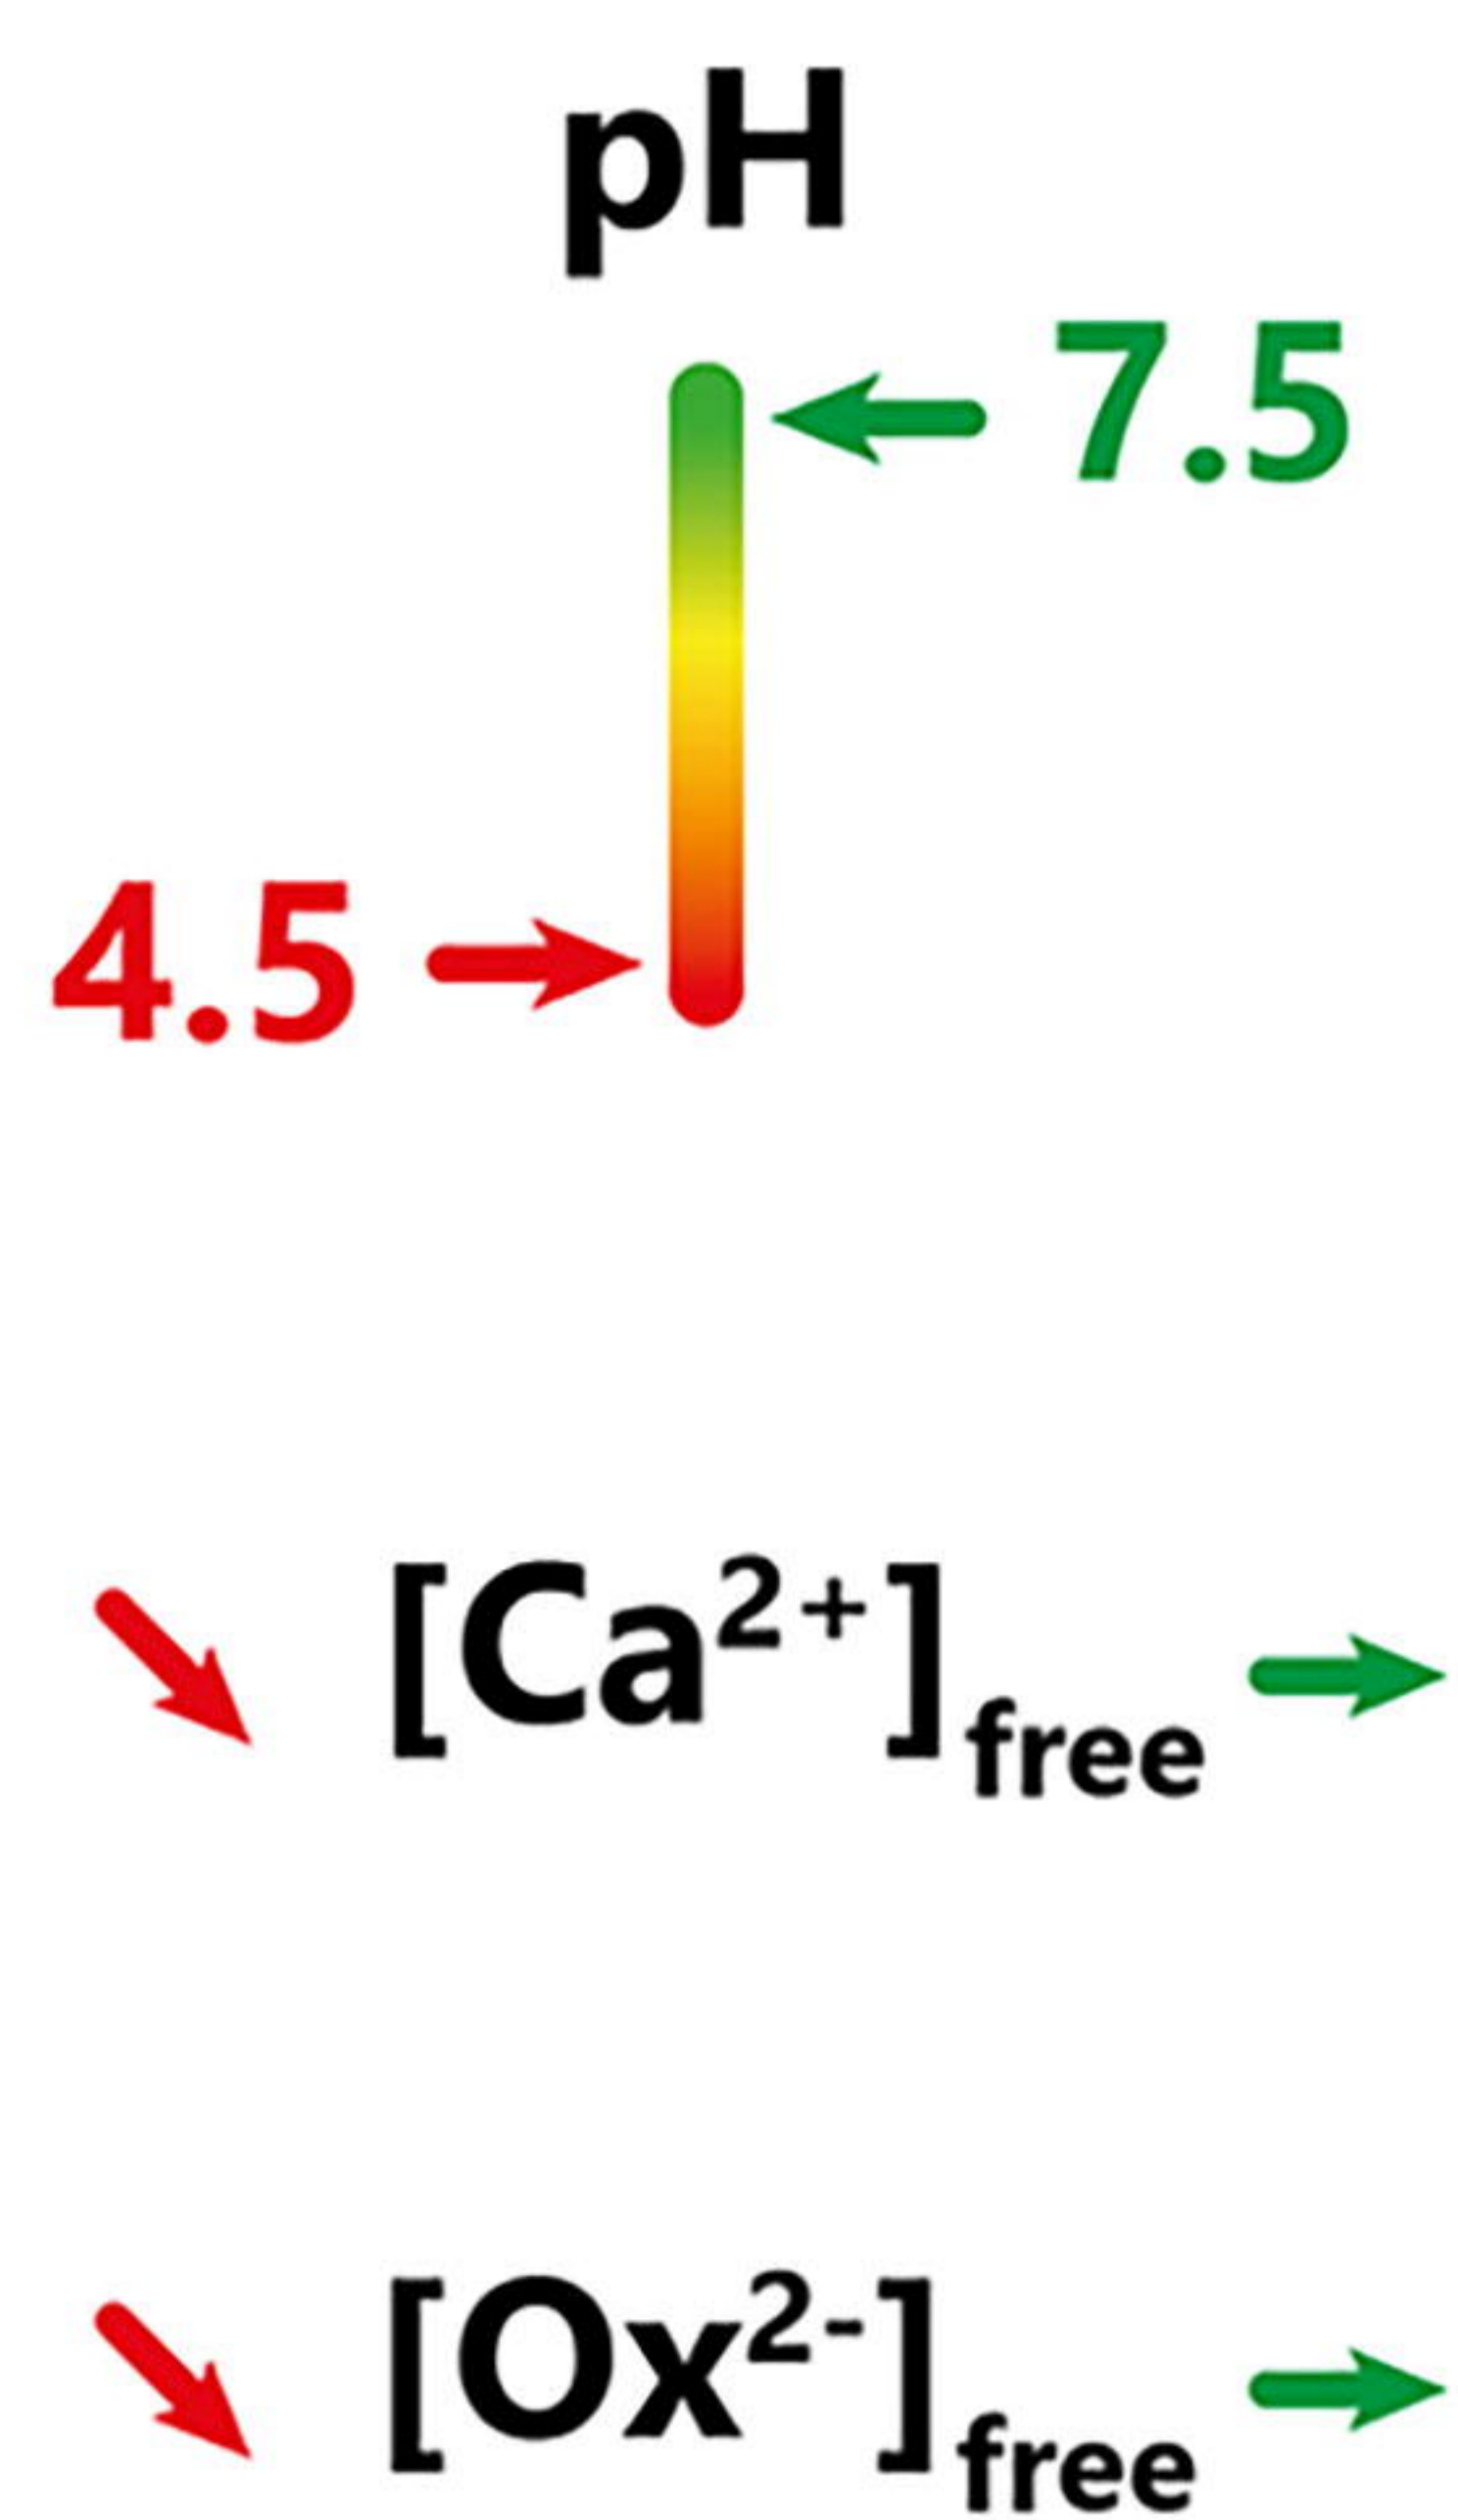**C**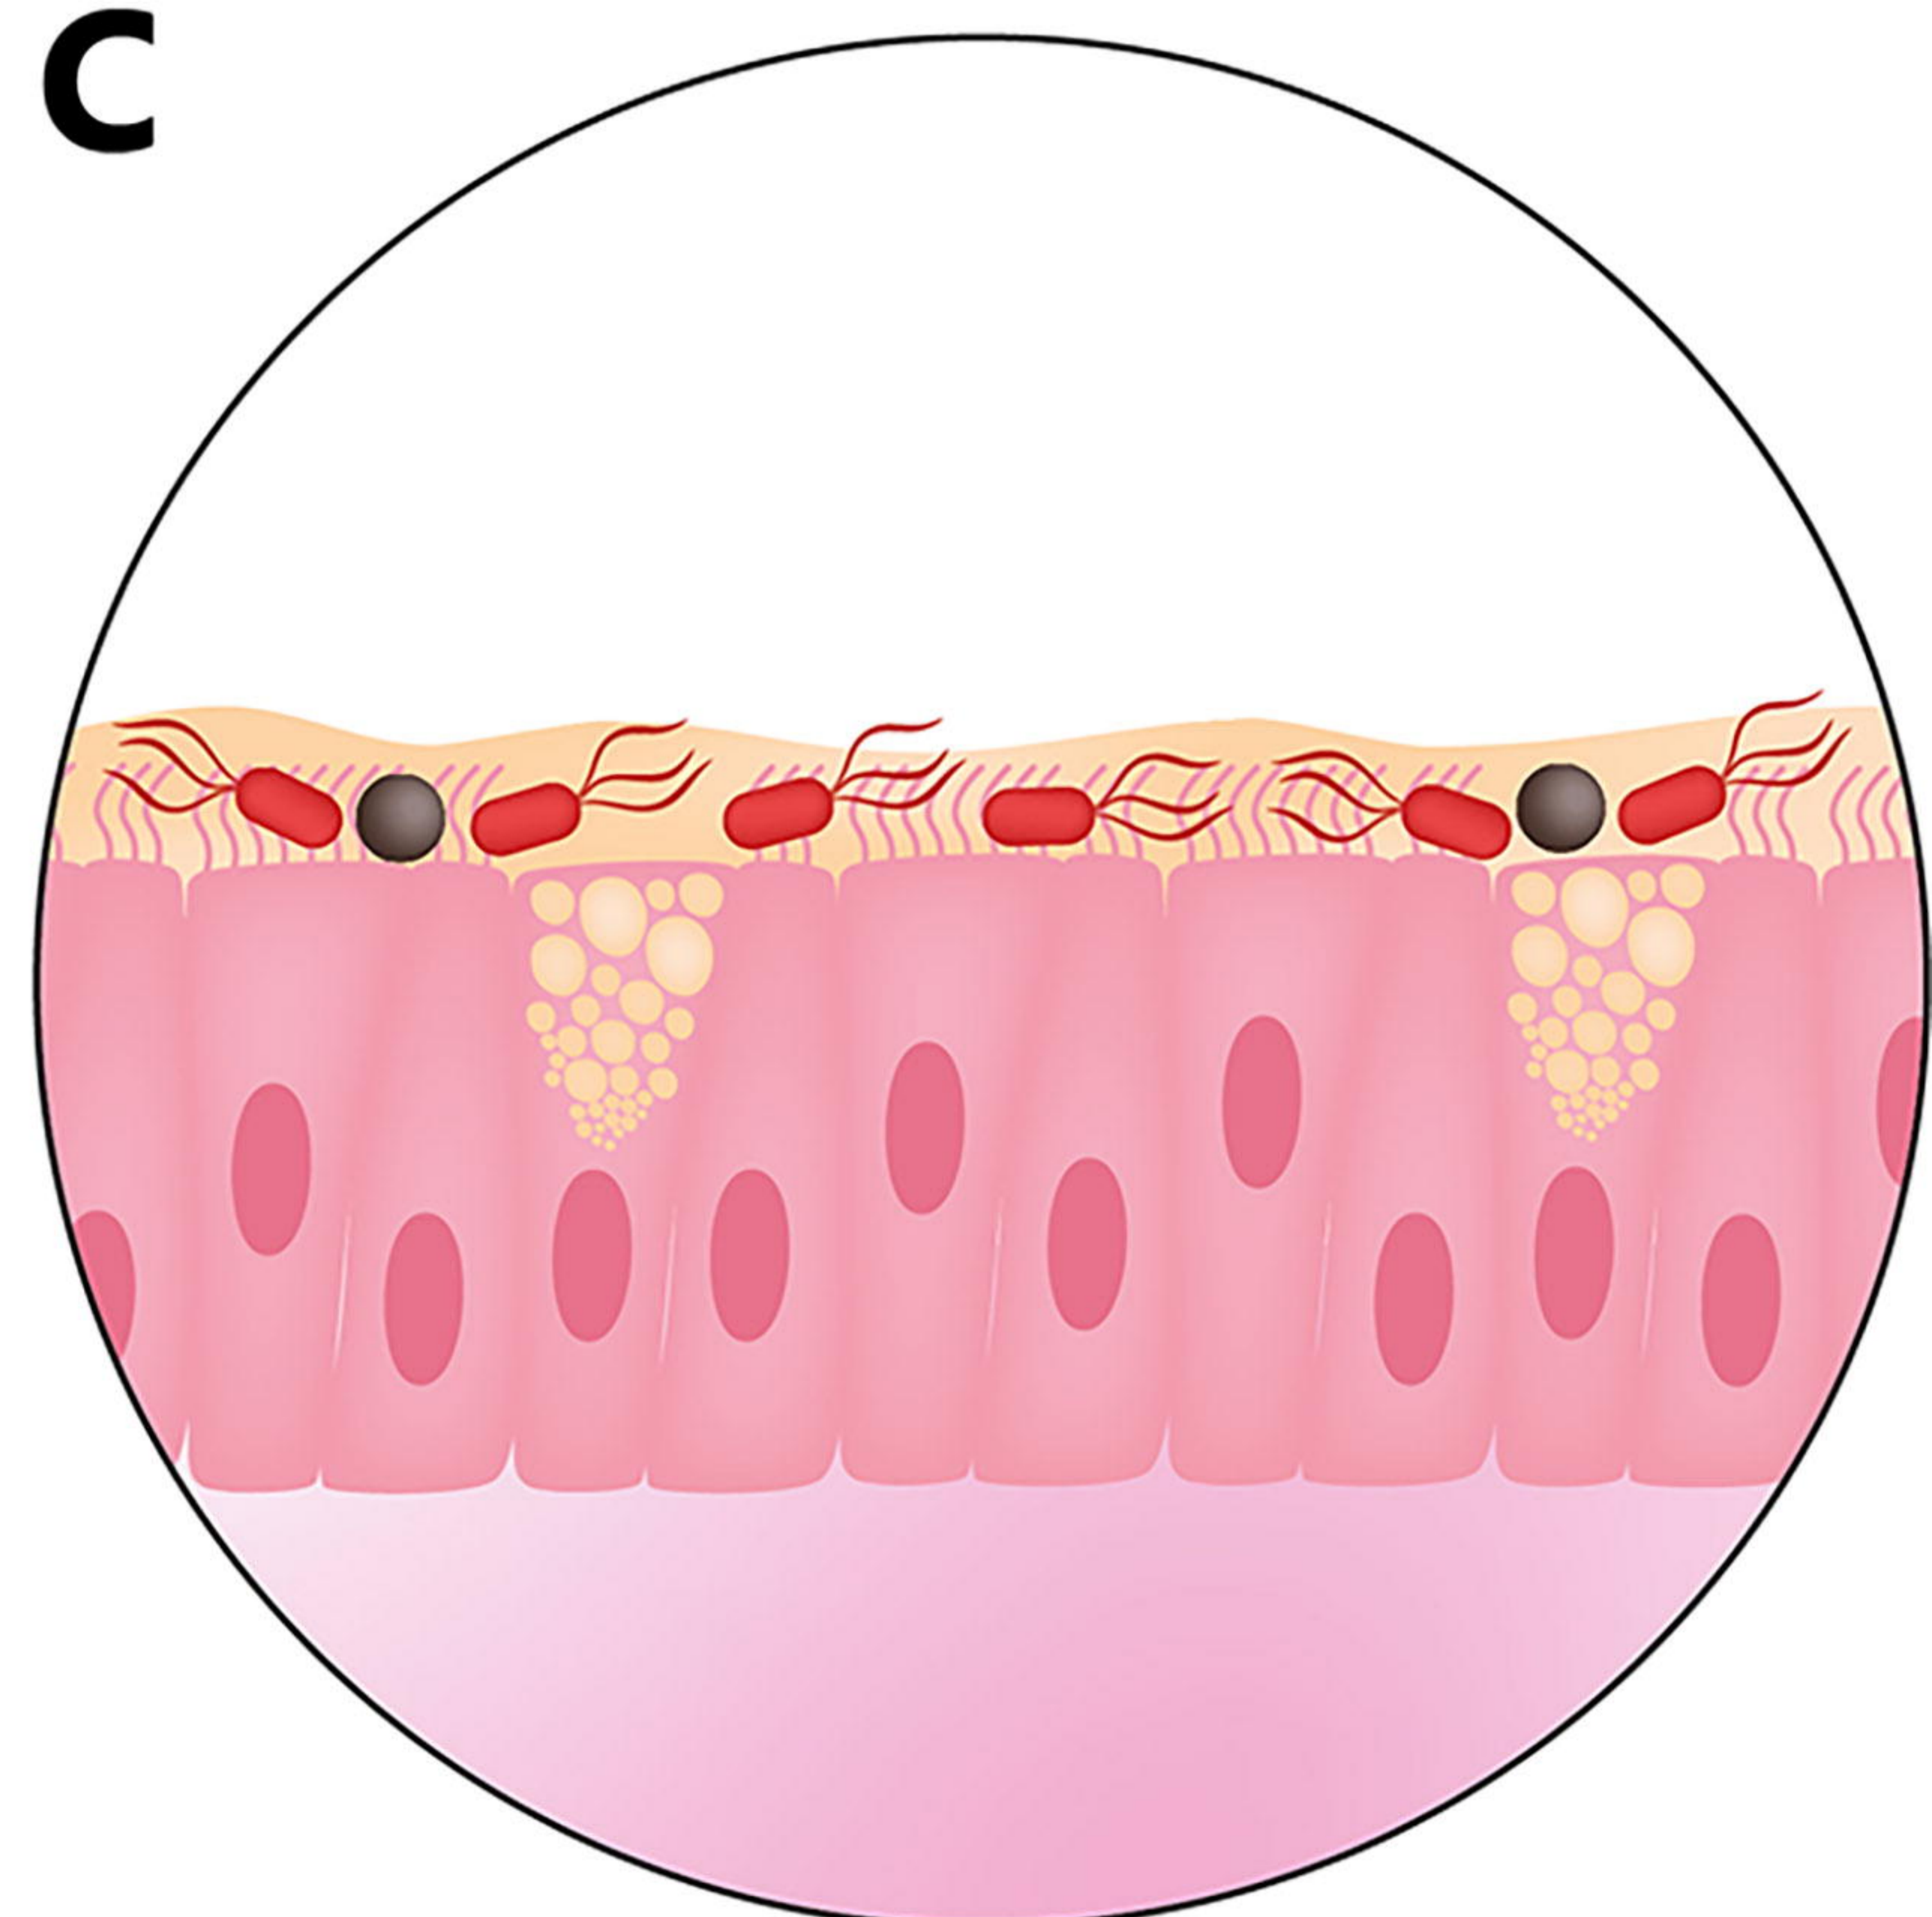**Biocontrol by modifying the environment to stop the infection**



**A**

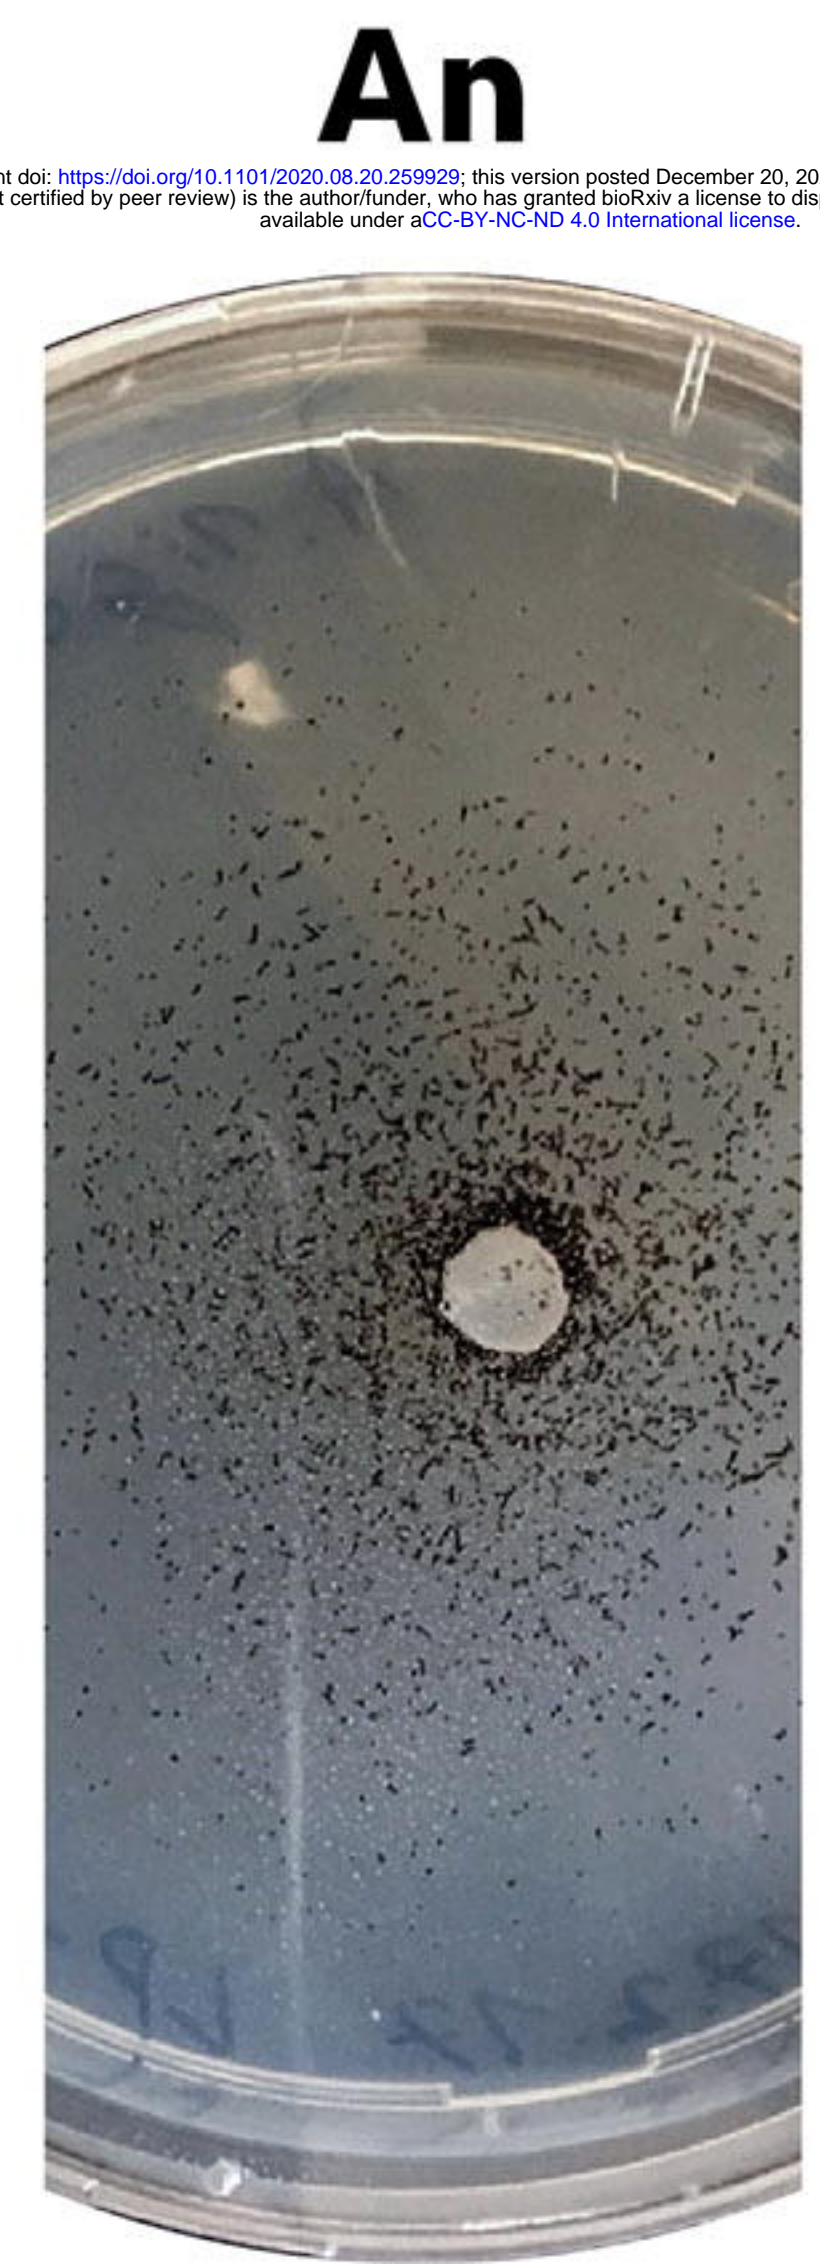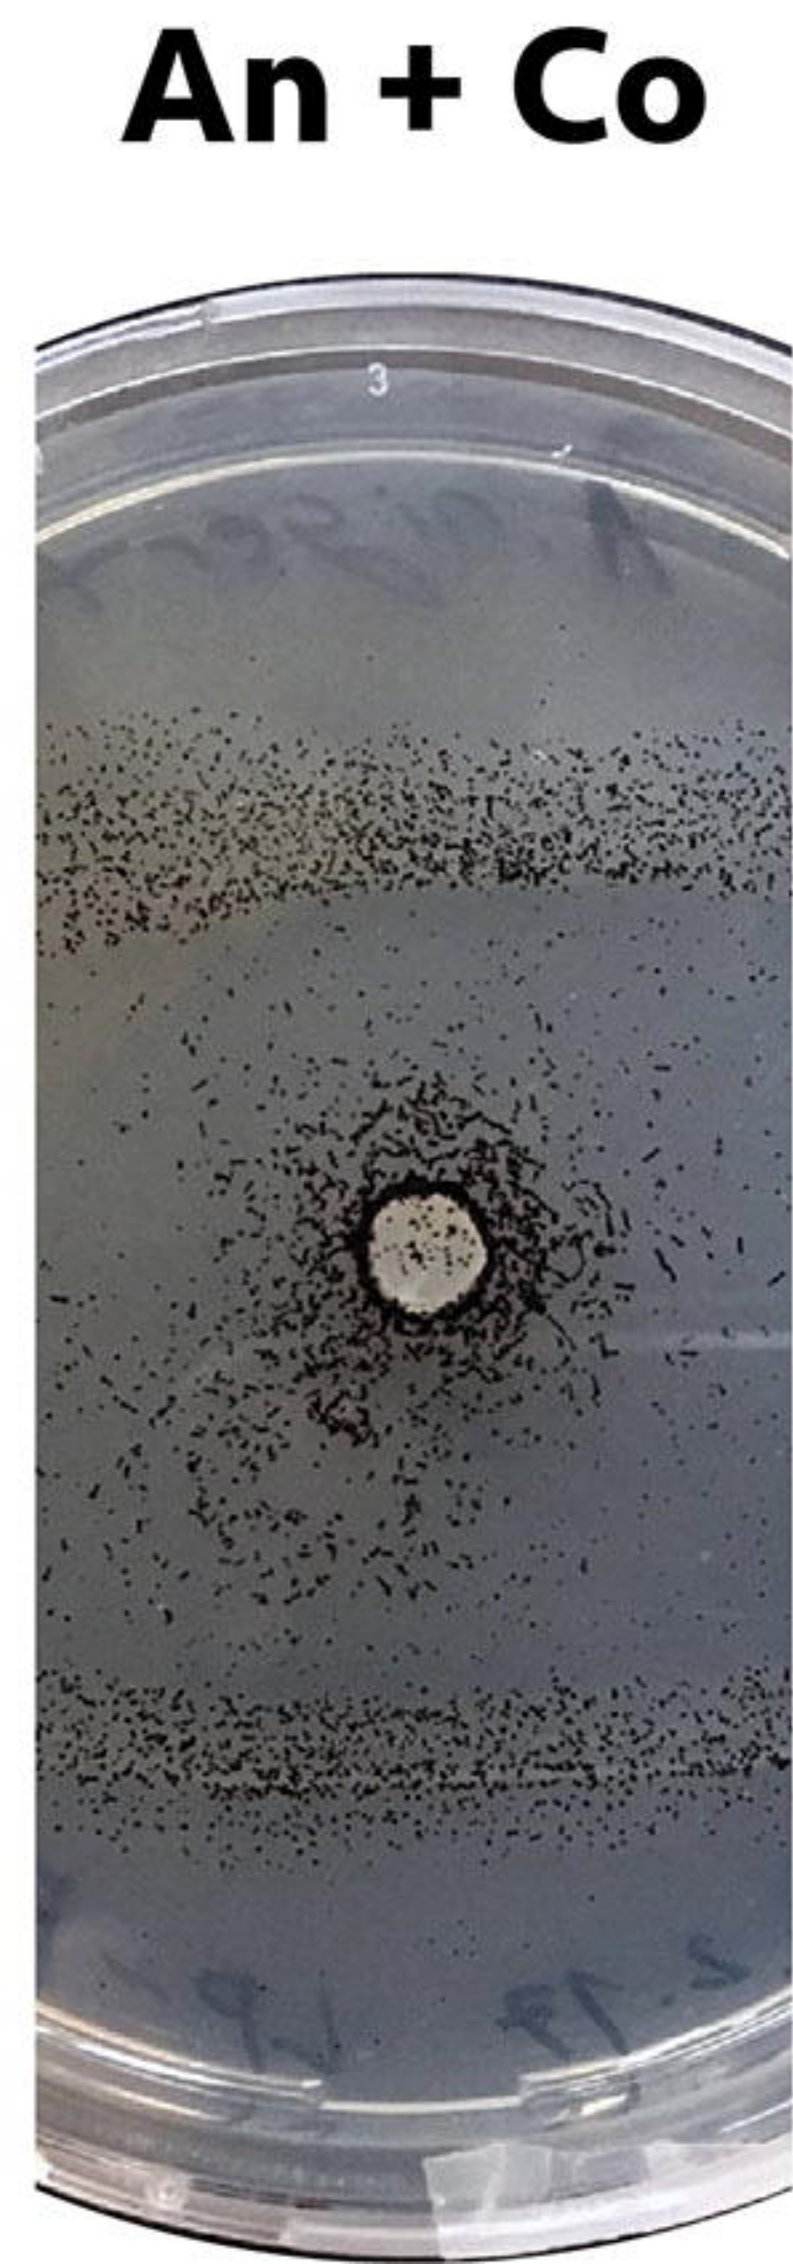

**B**

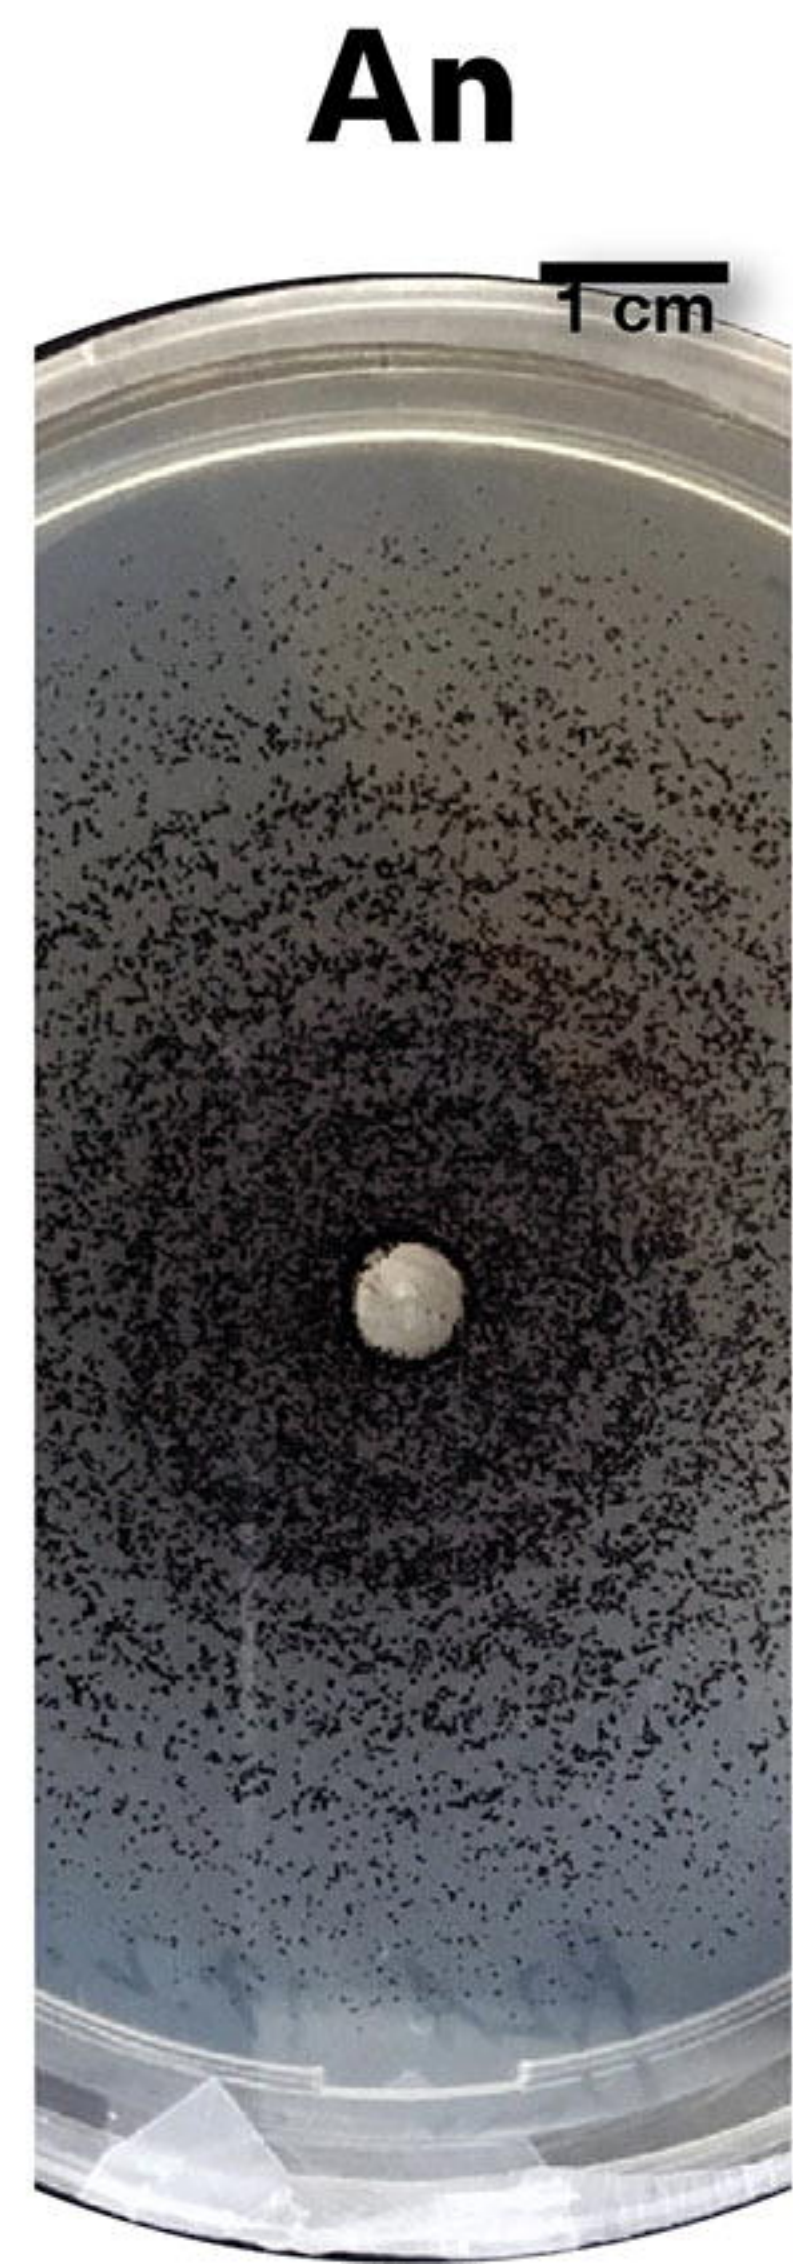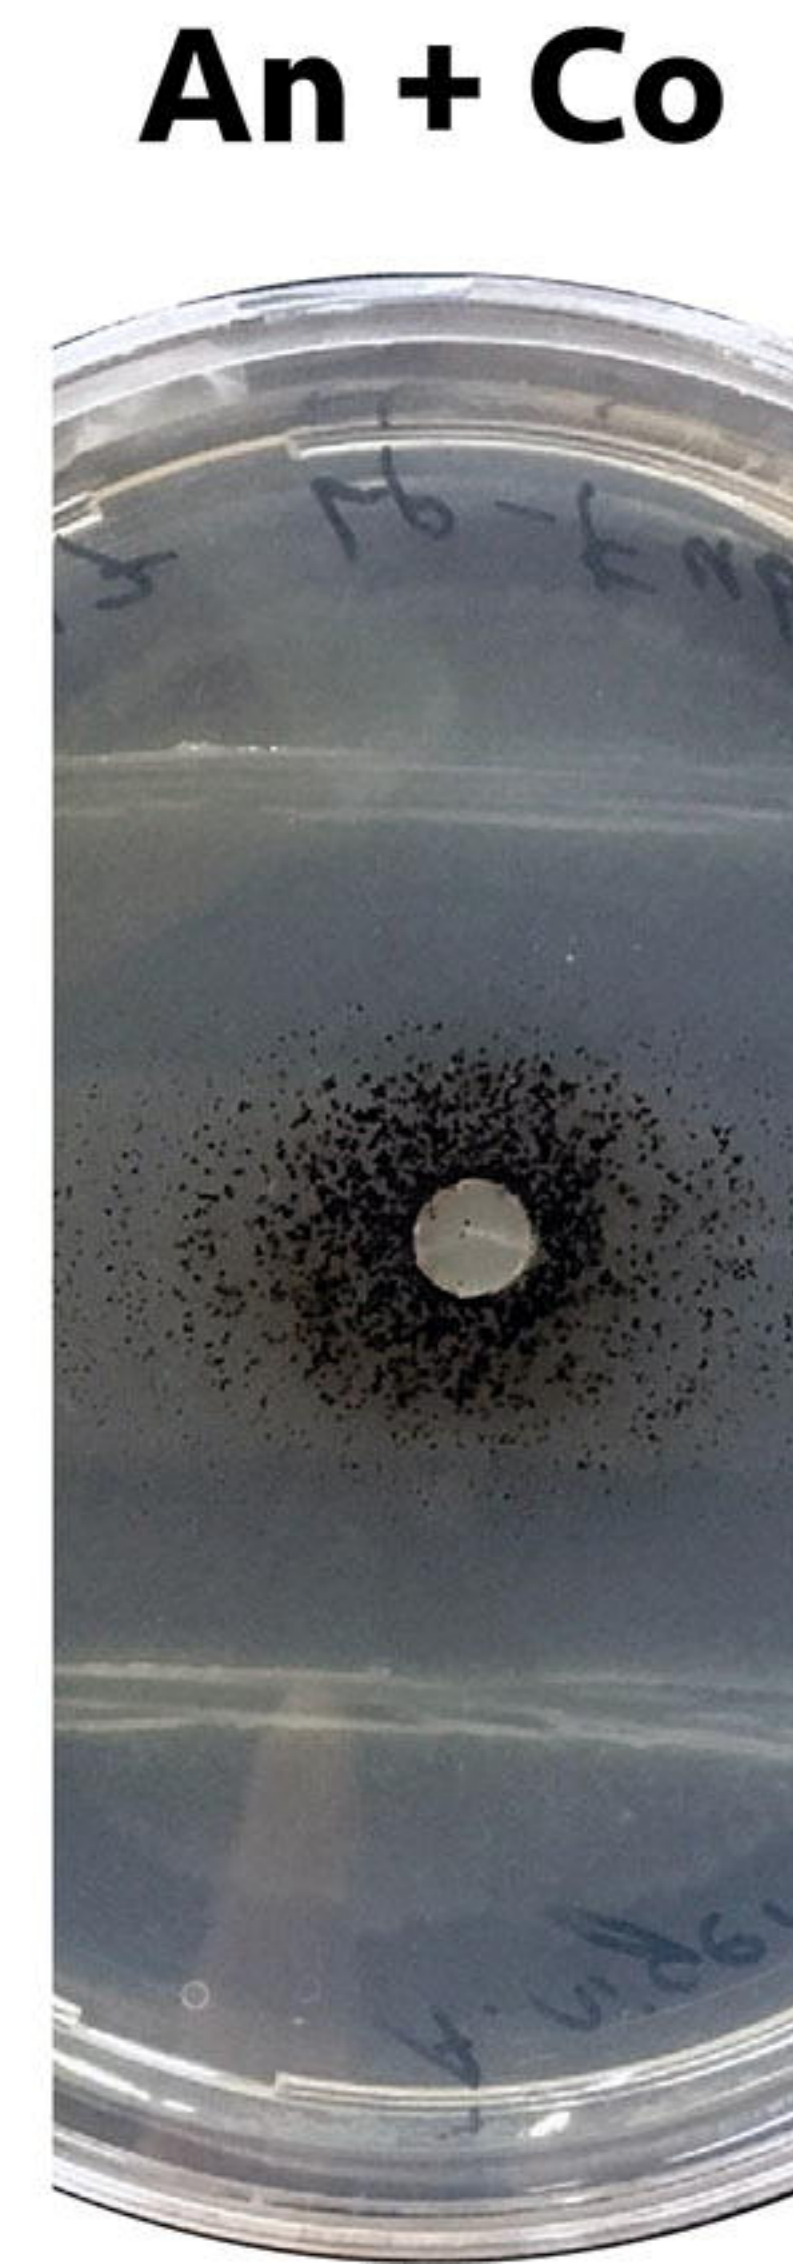

**C**

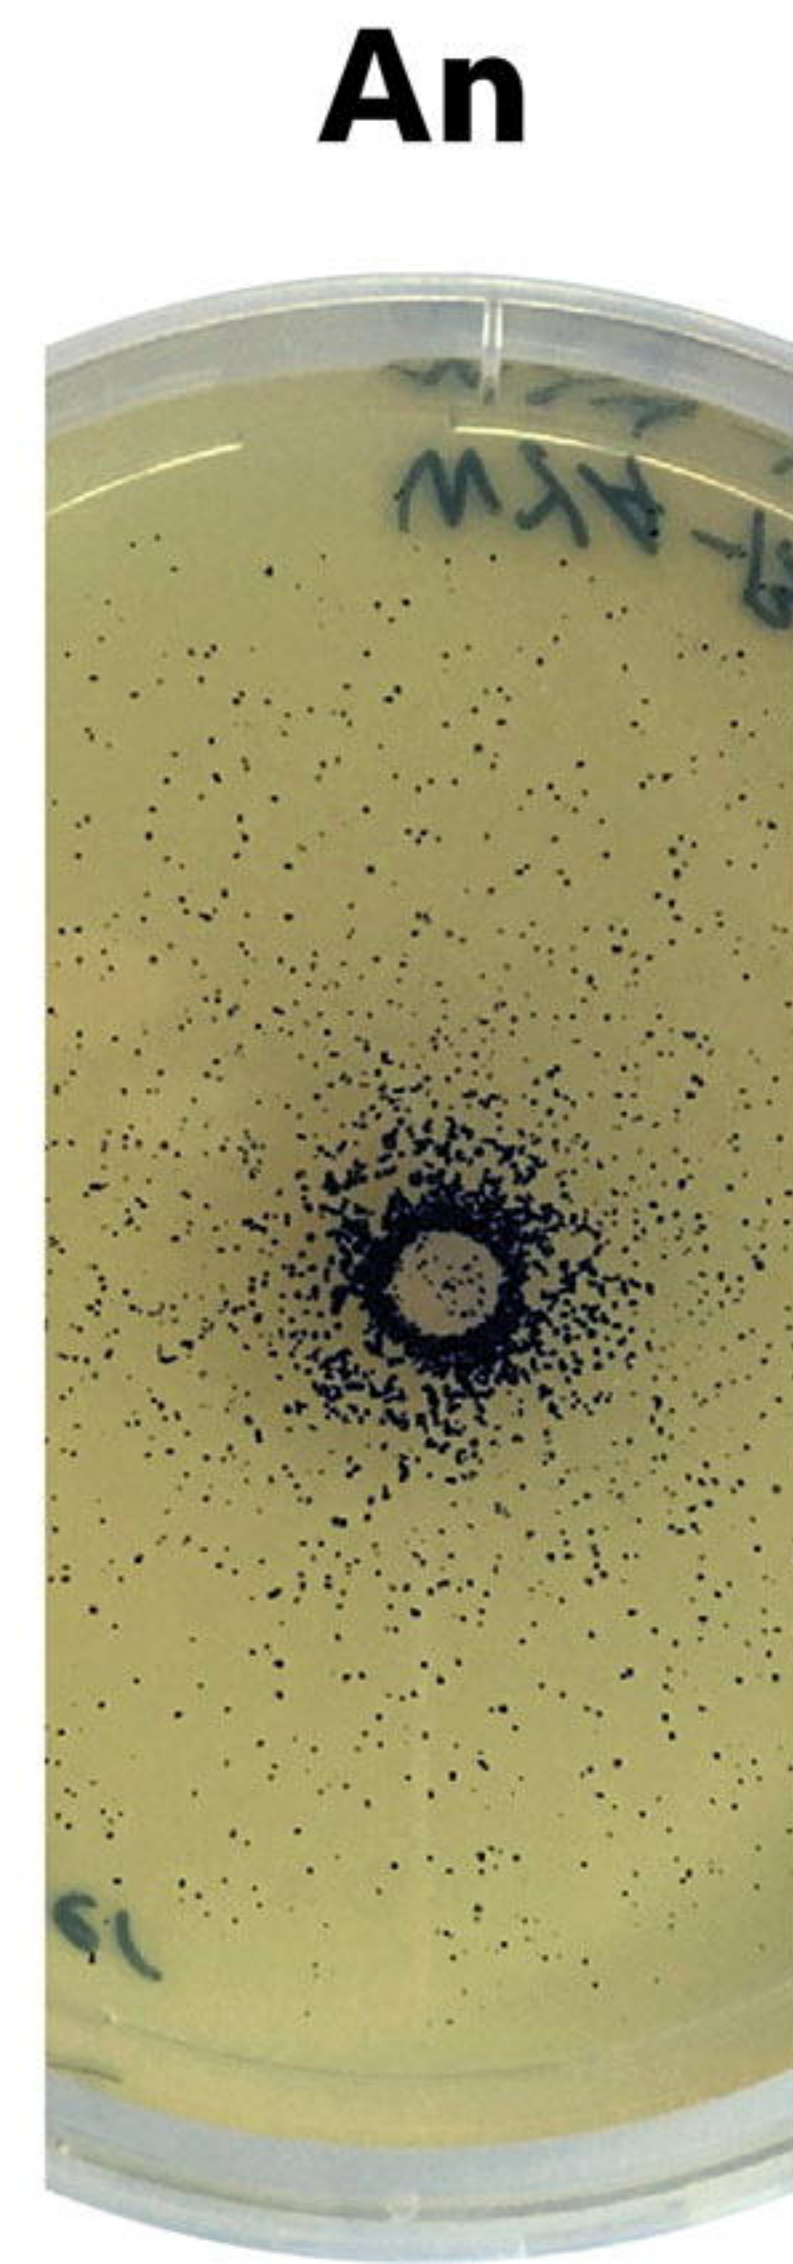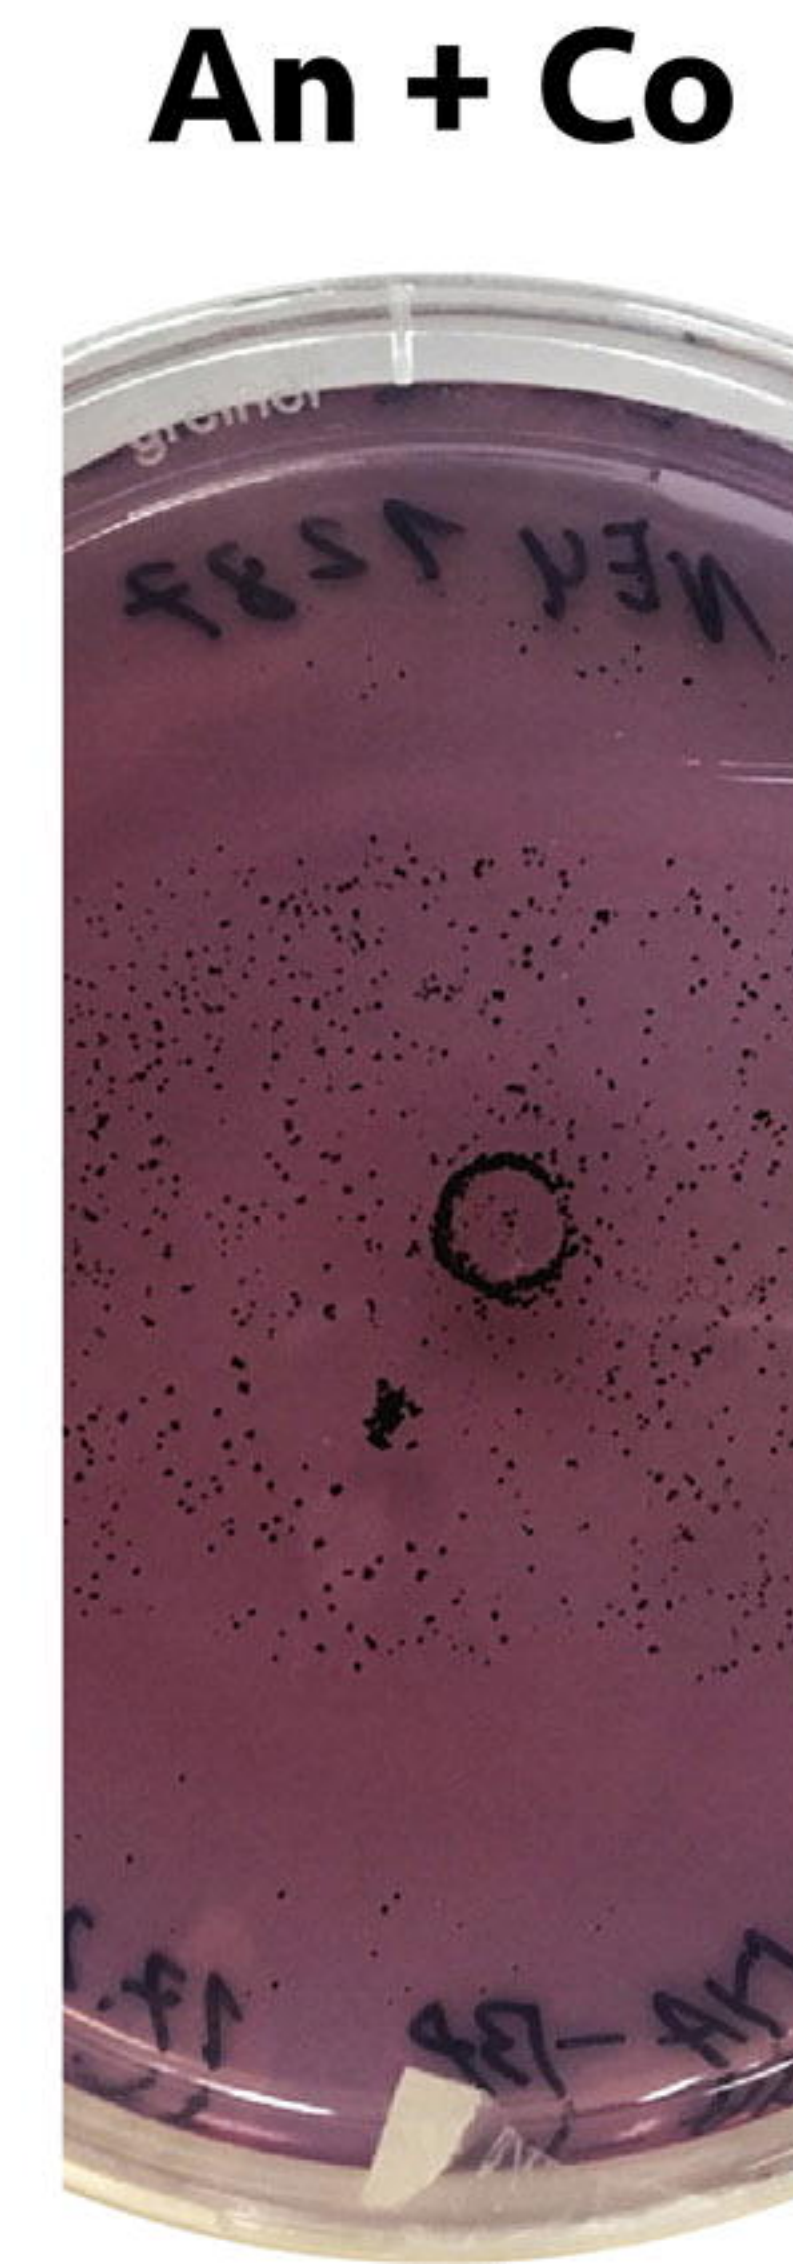

**A**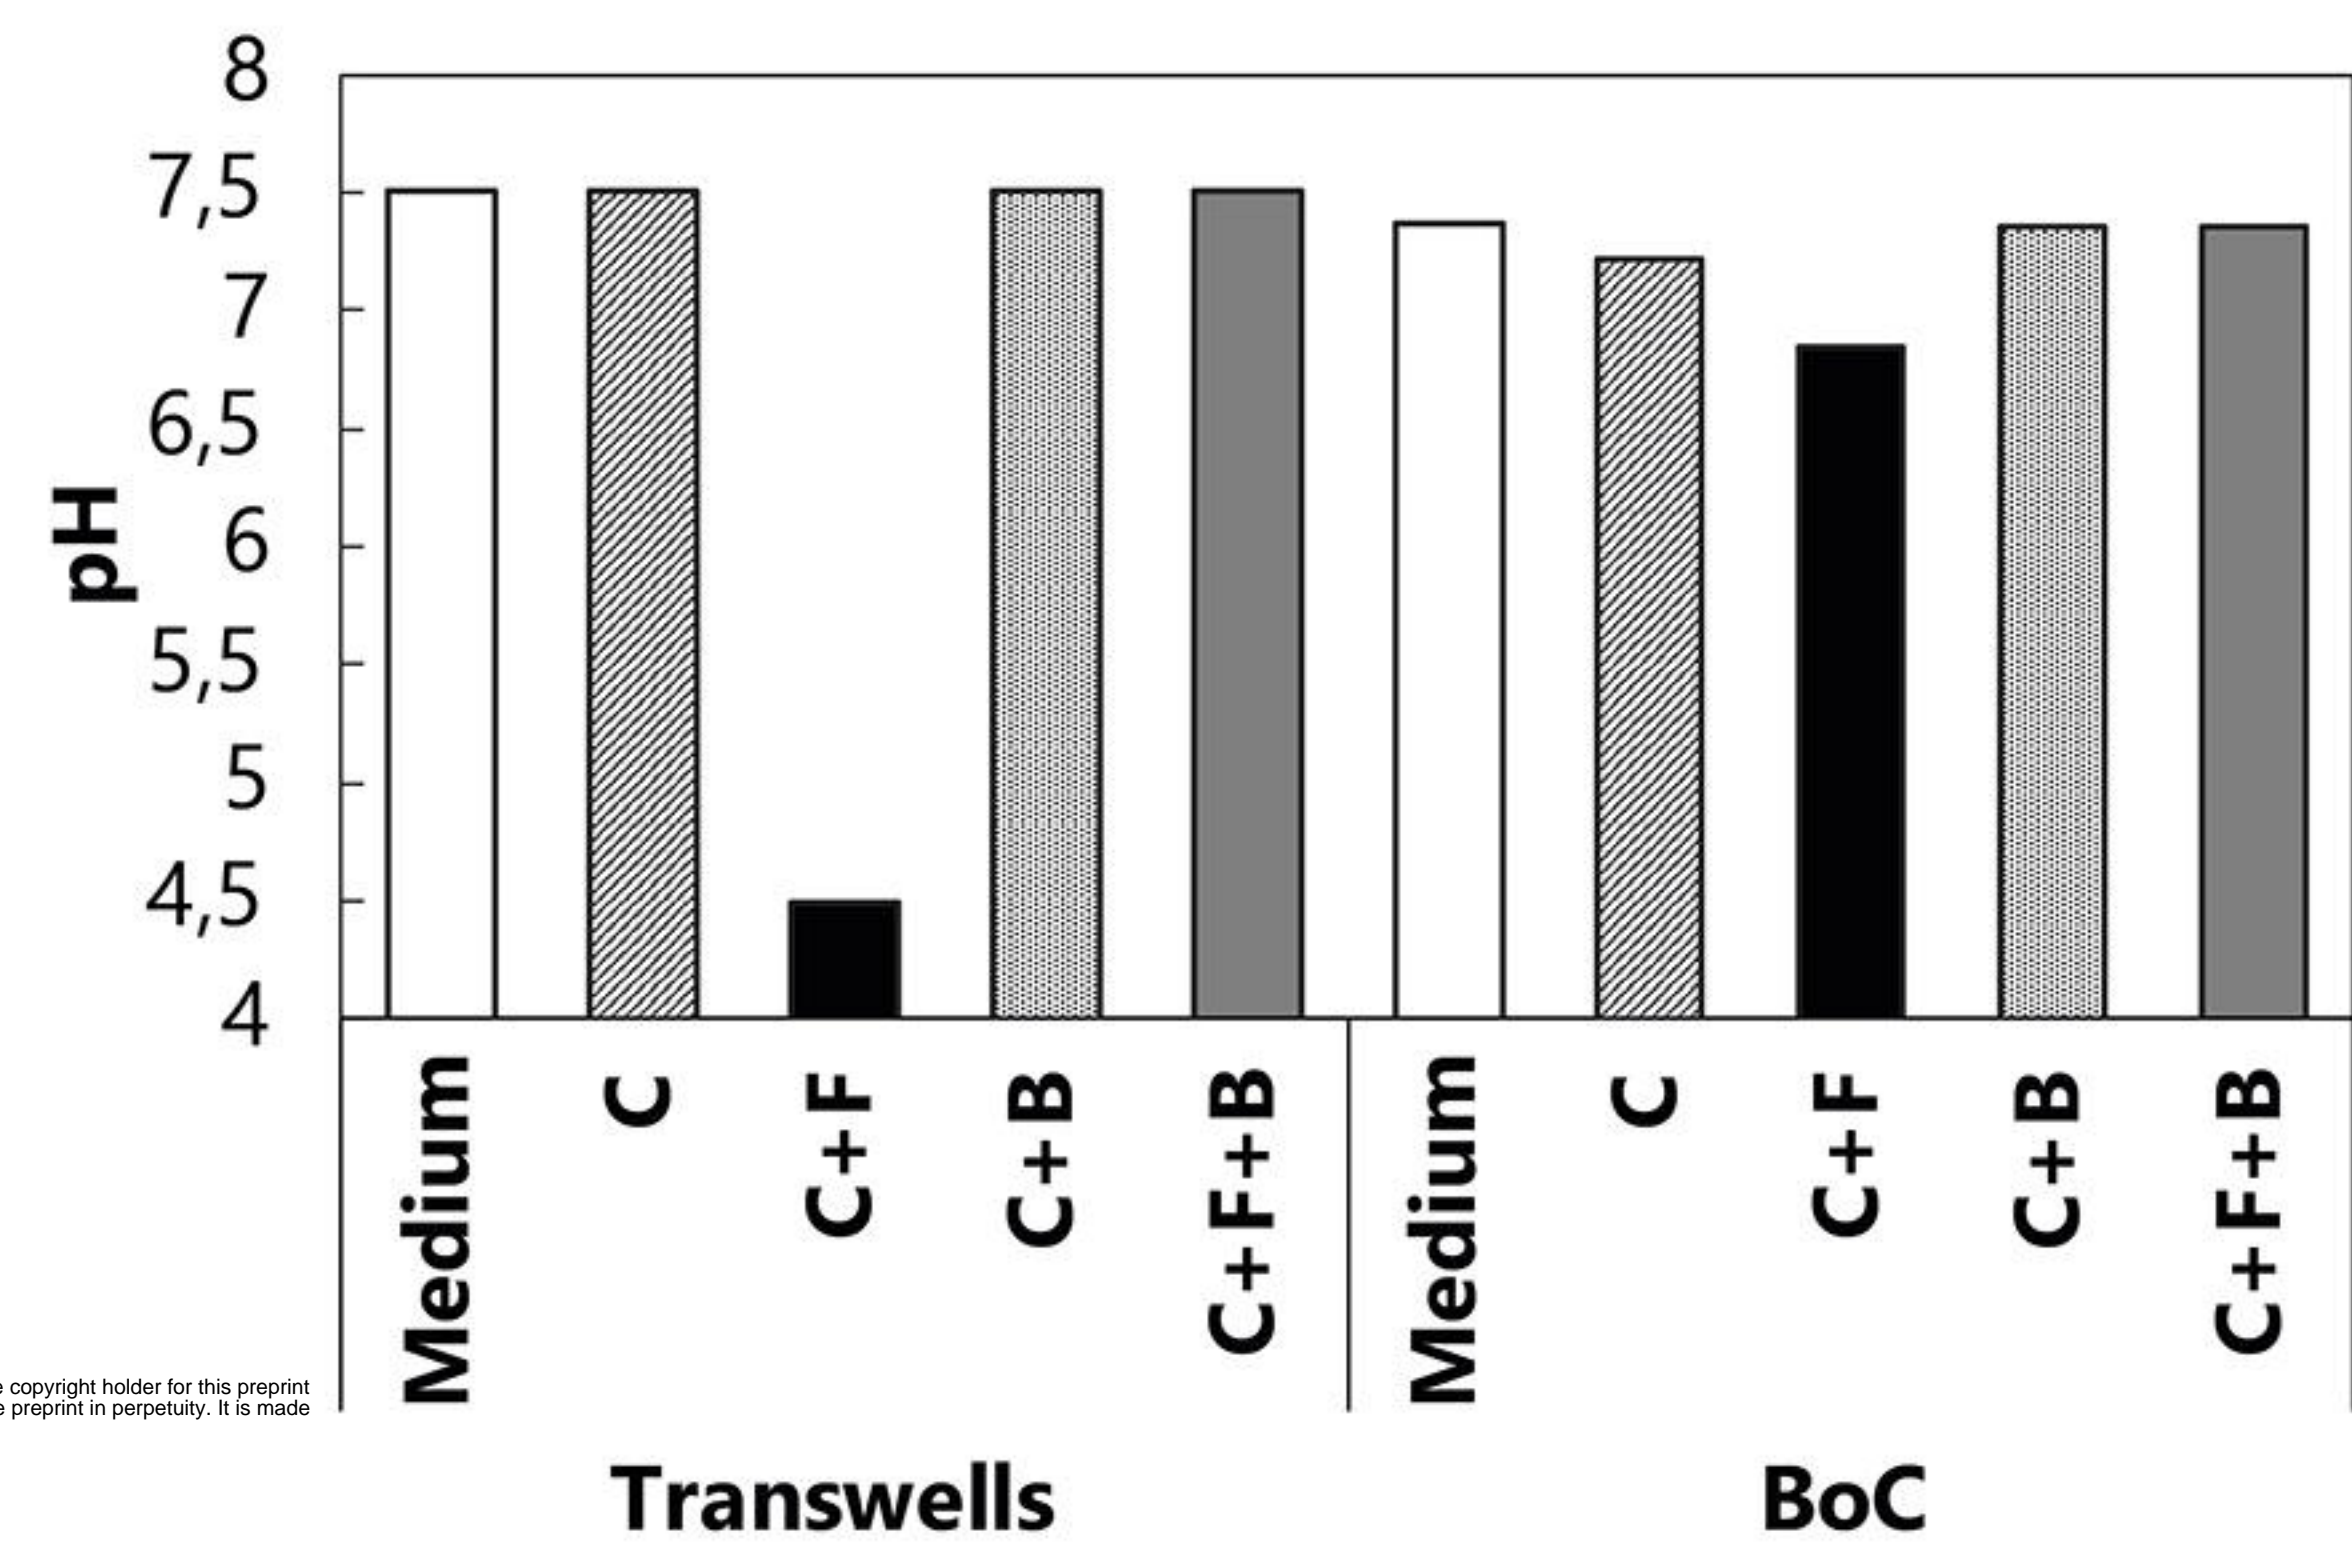**B**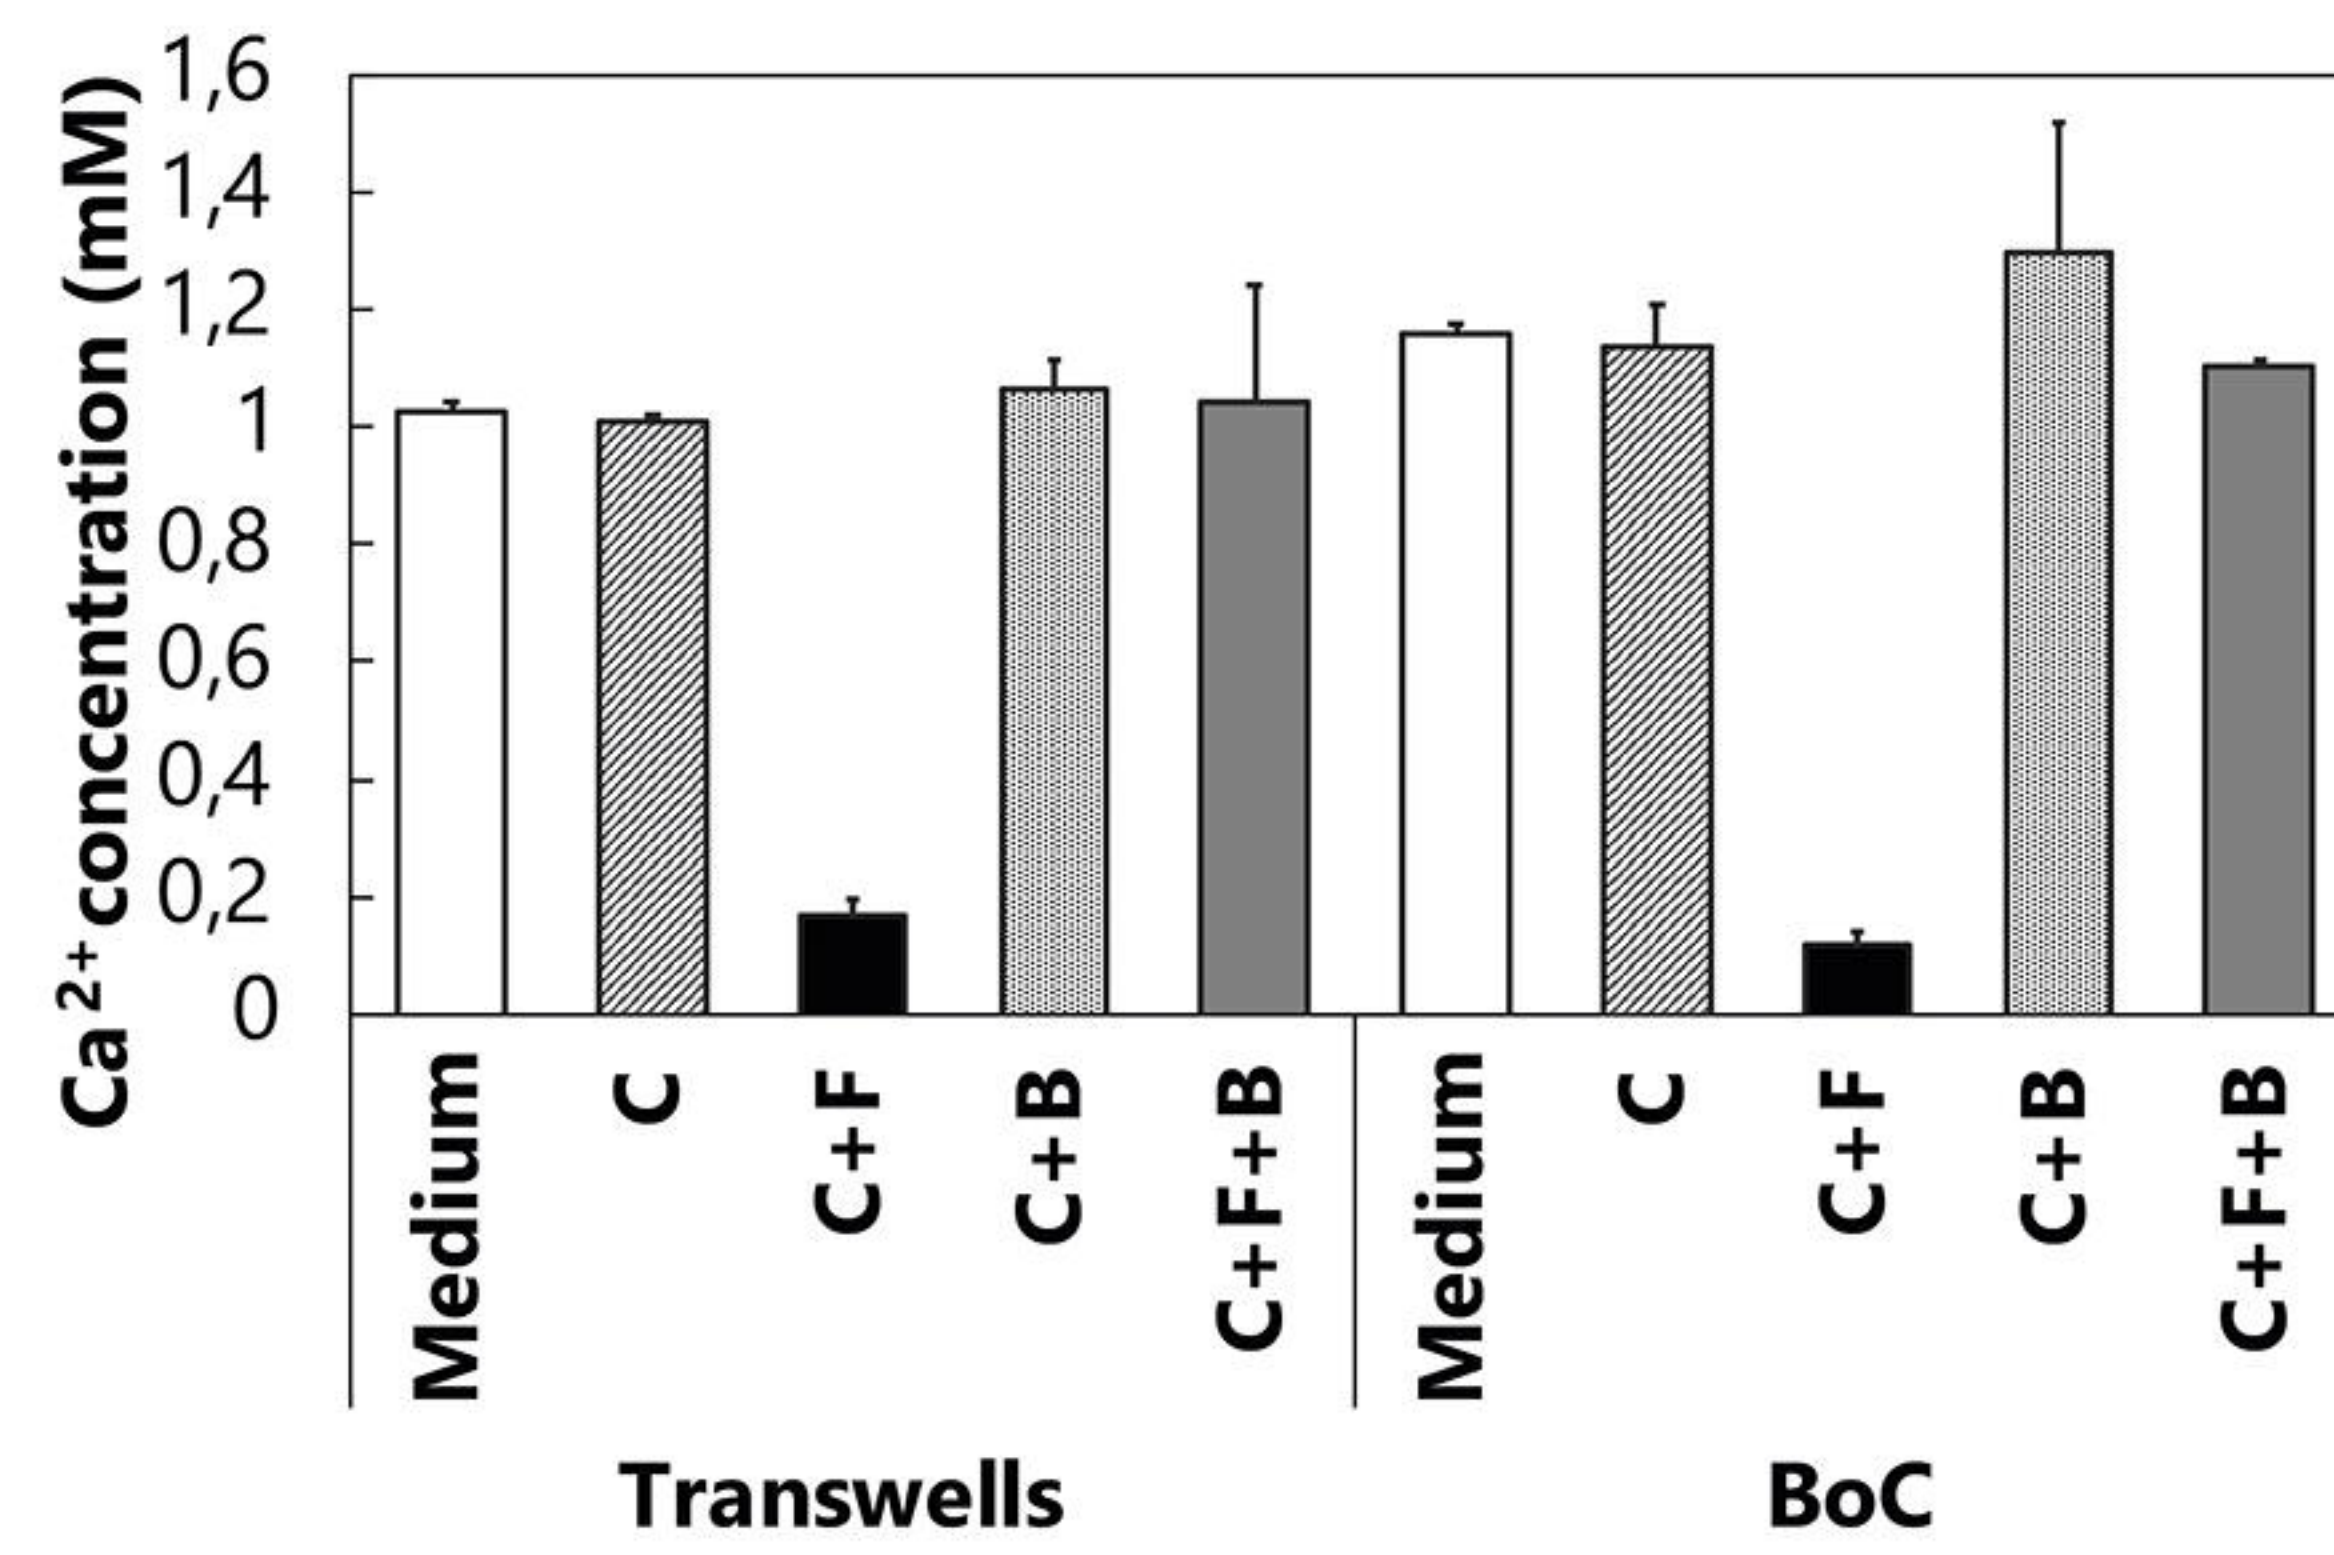**C**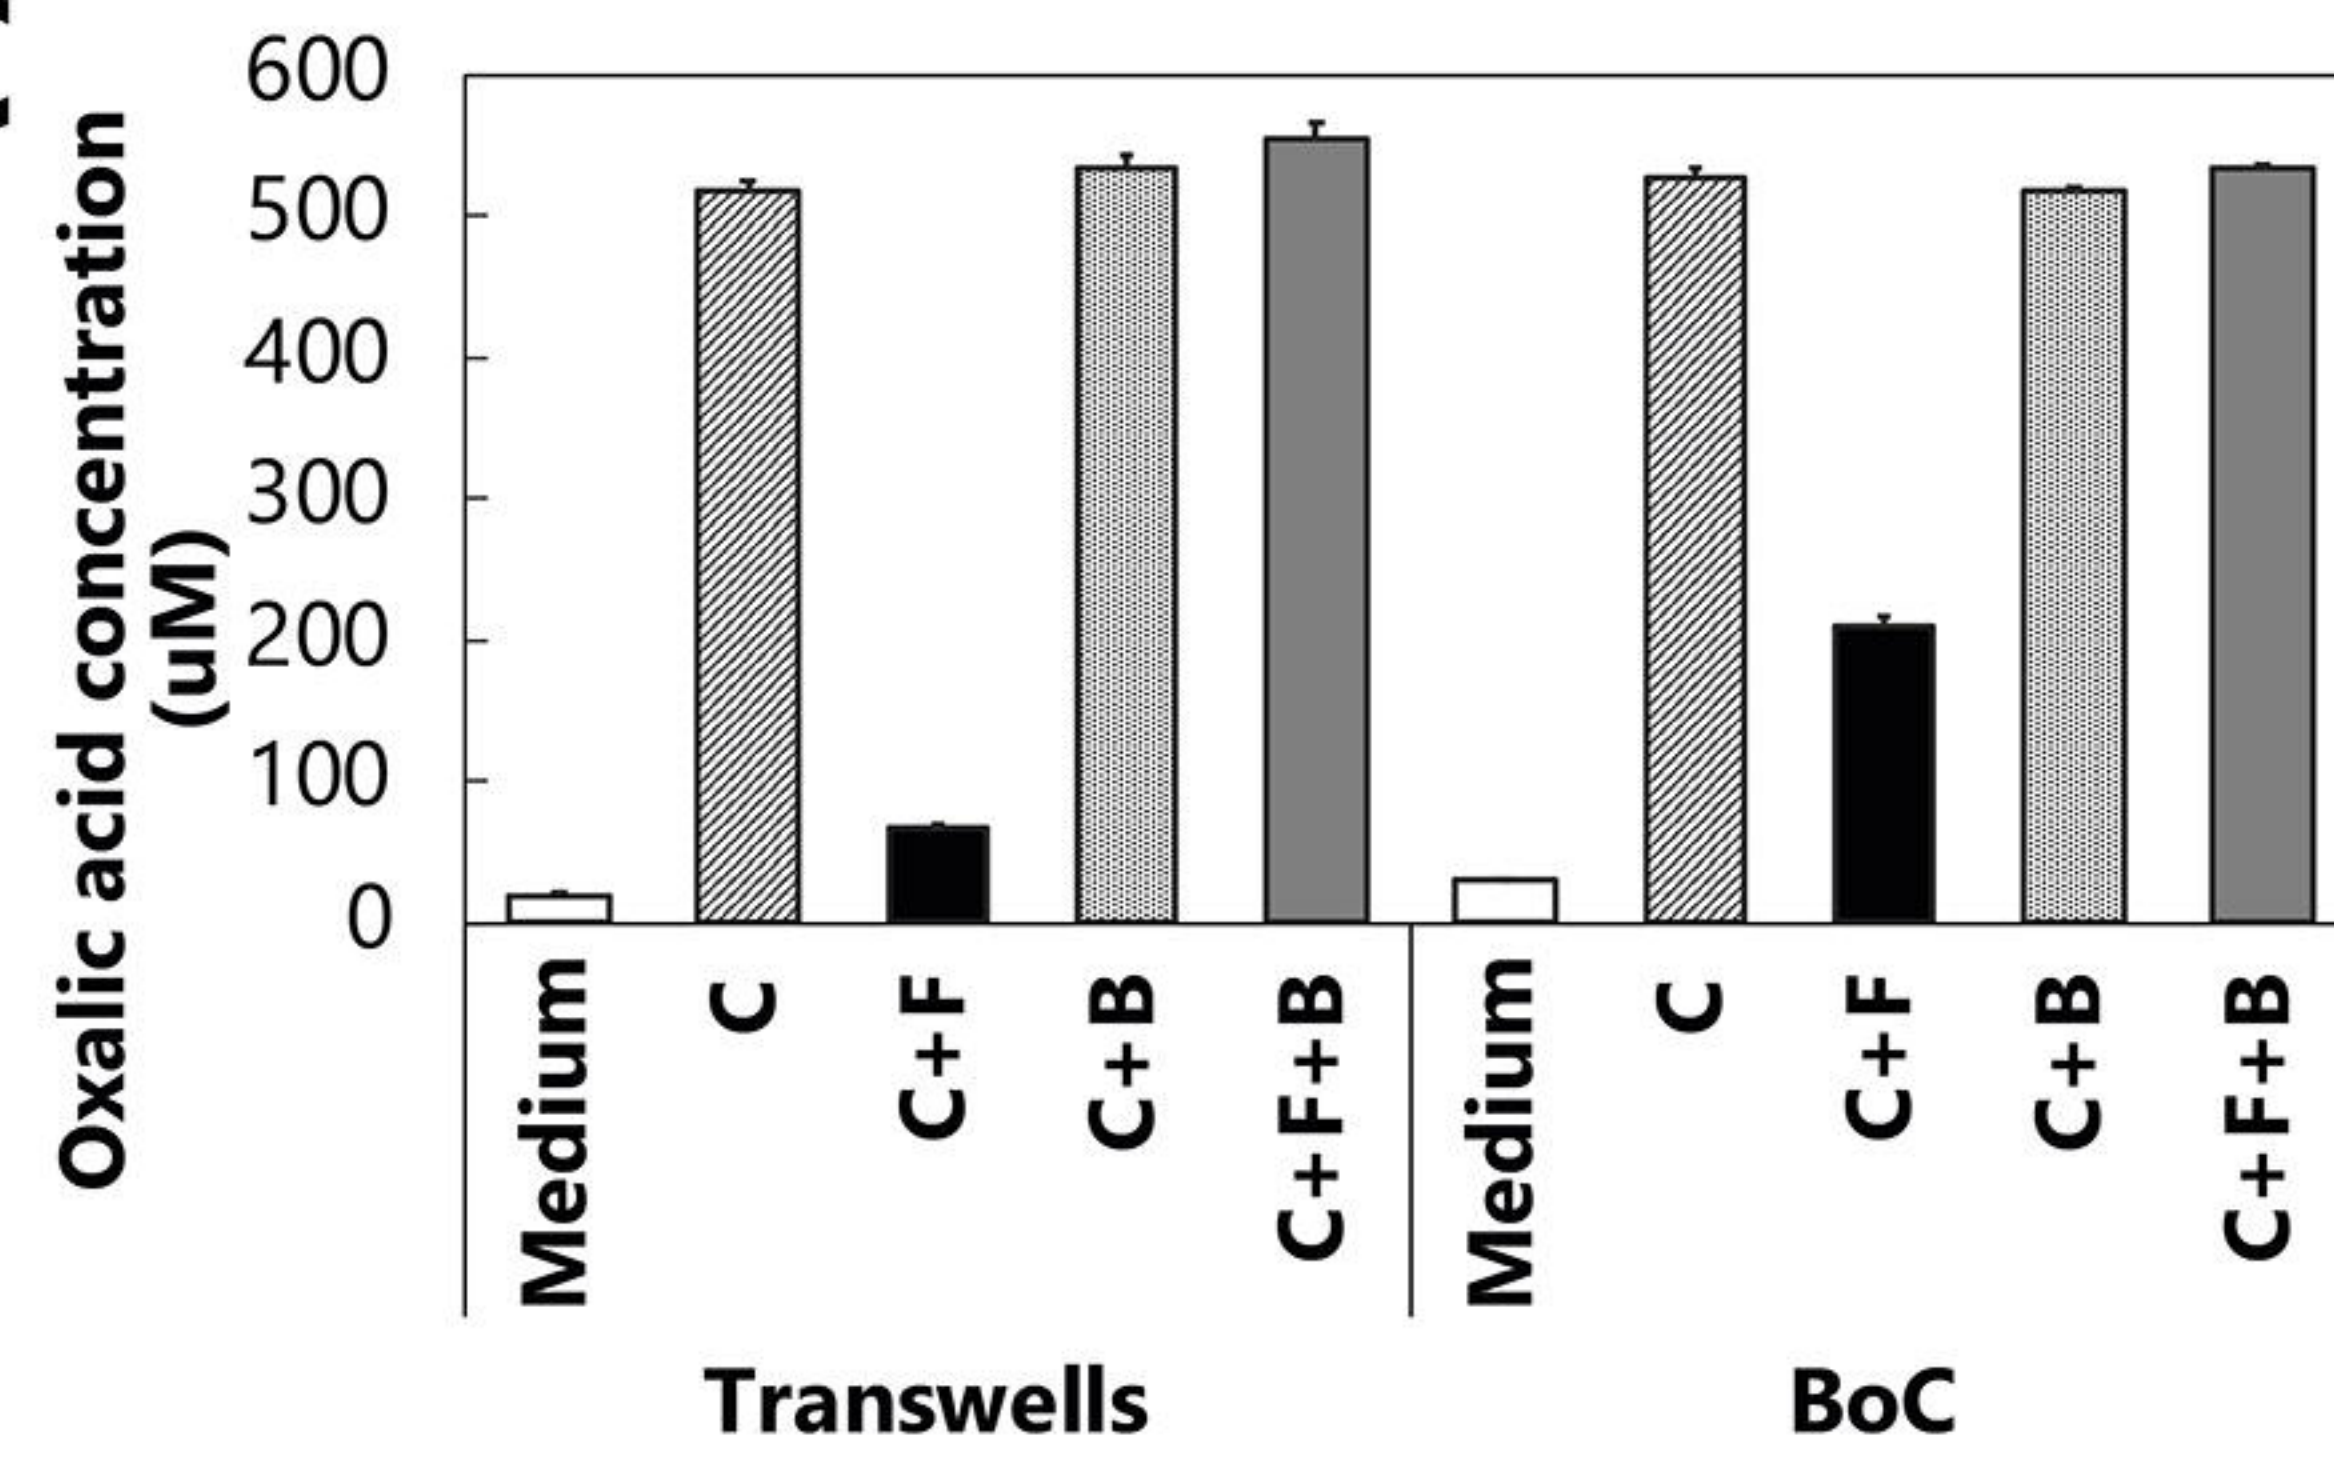

bioRxiv preprint doi: <https://doi.org/10.1101/2020.08.20.259929>; this version posted December 20, 2020. The copyright holder for this preprint (which was not certified by peer review) is the author/funder, who has granted bioRxiv a license to display the preprint in perpetuity. It is made available under aCC-BY-NC-ND 4.0 International license.

**D**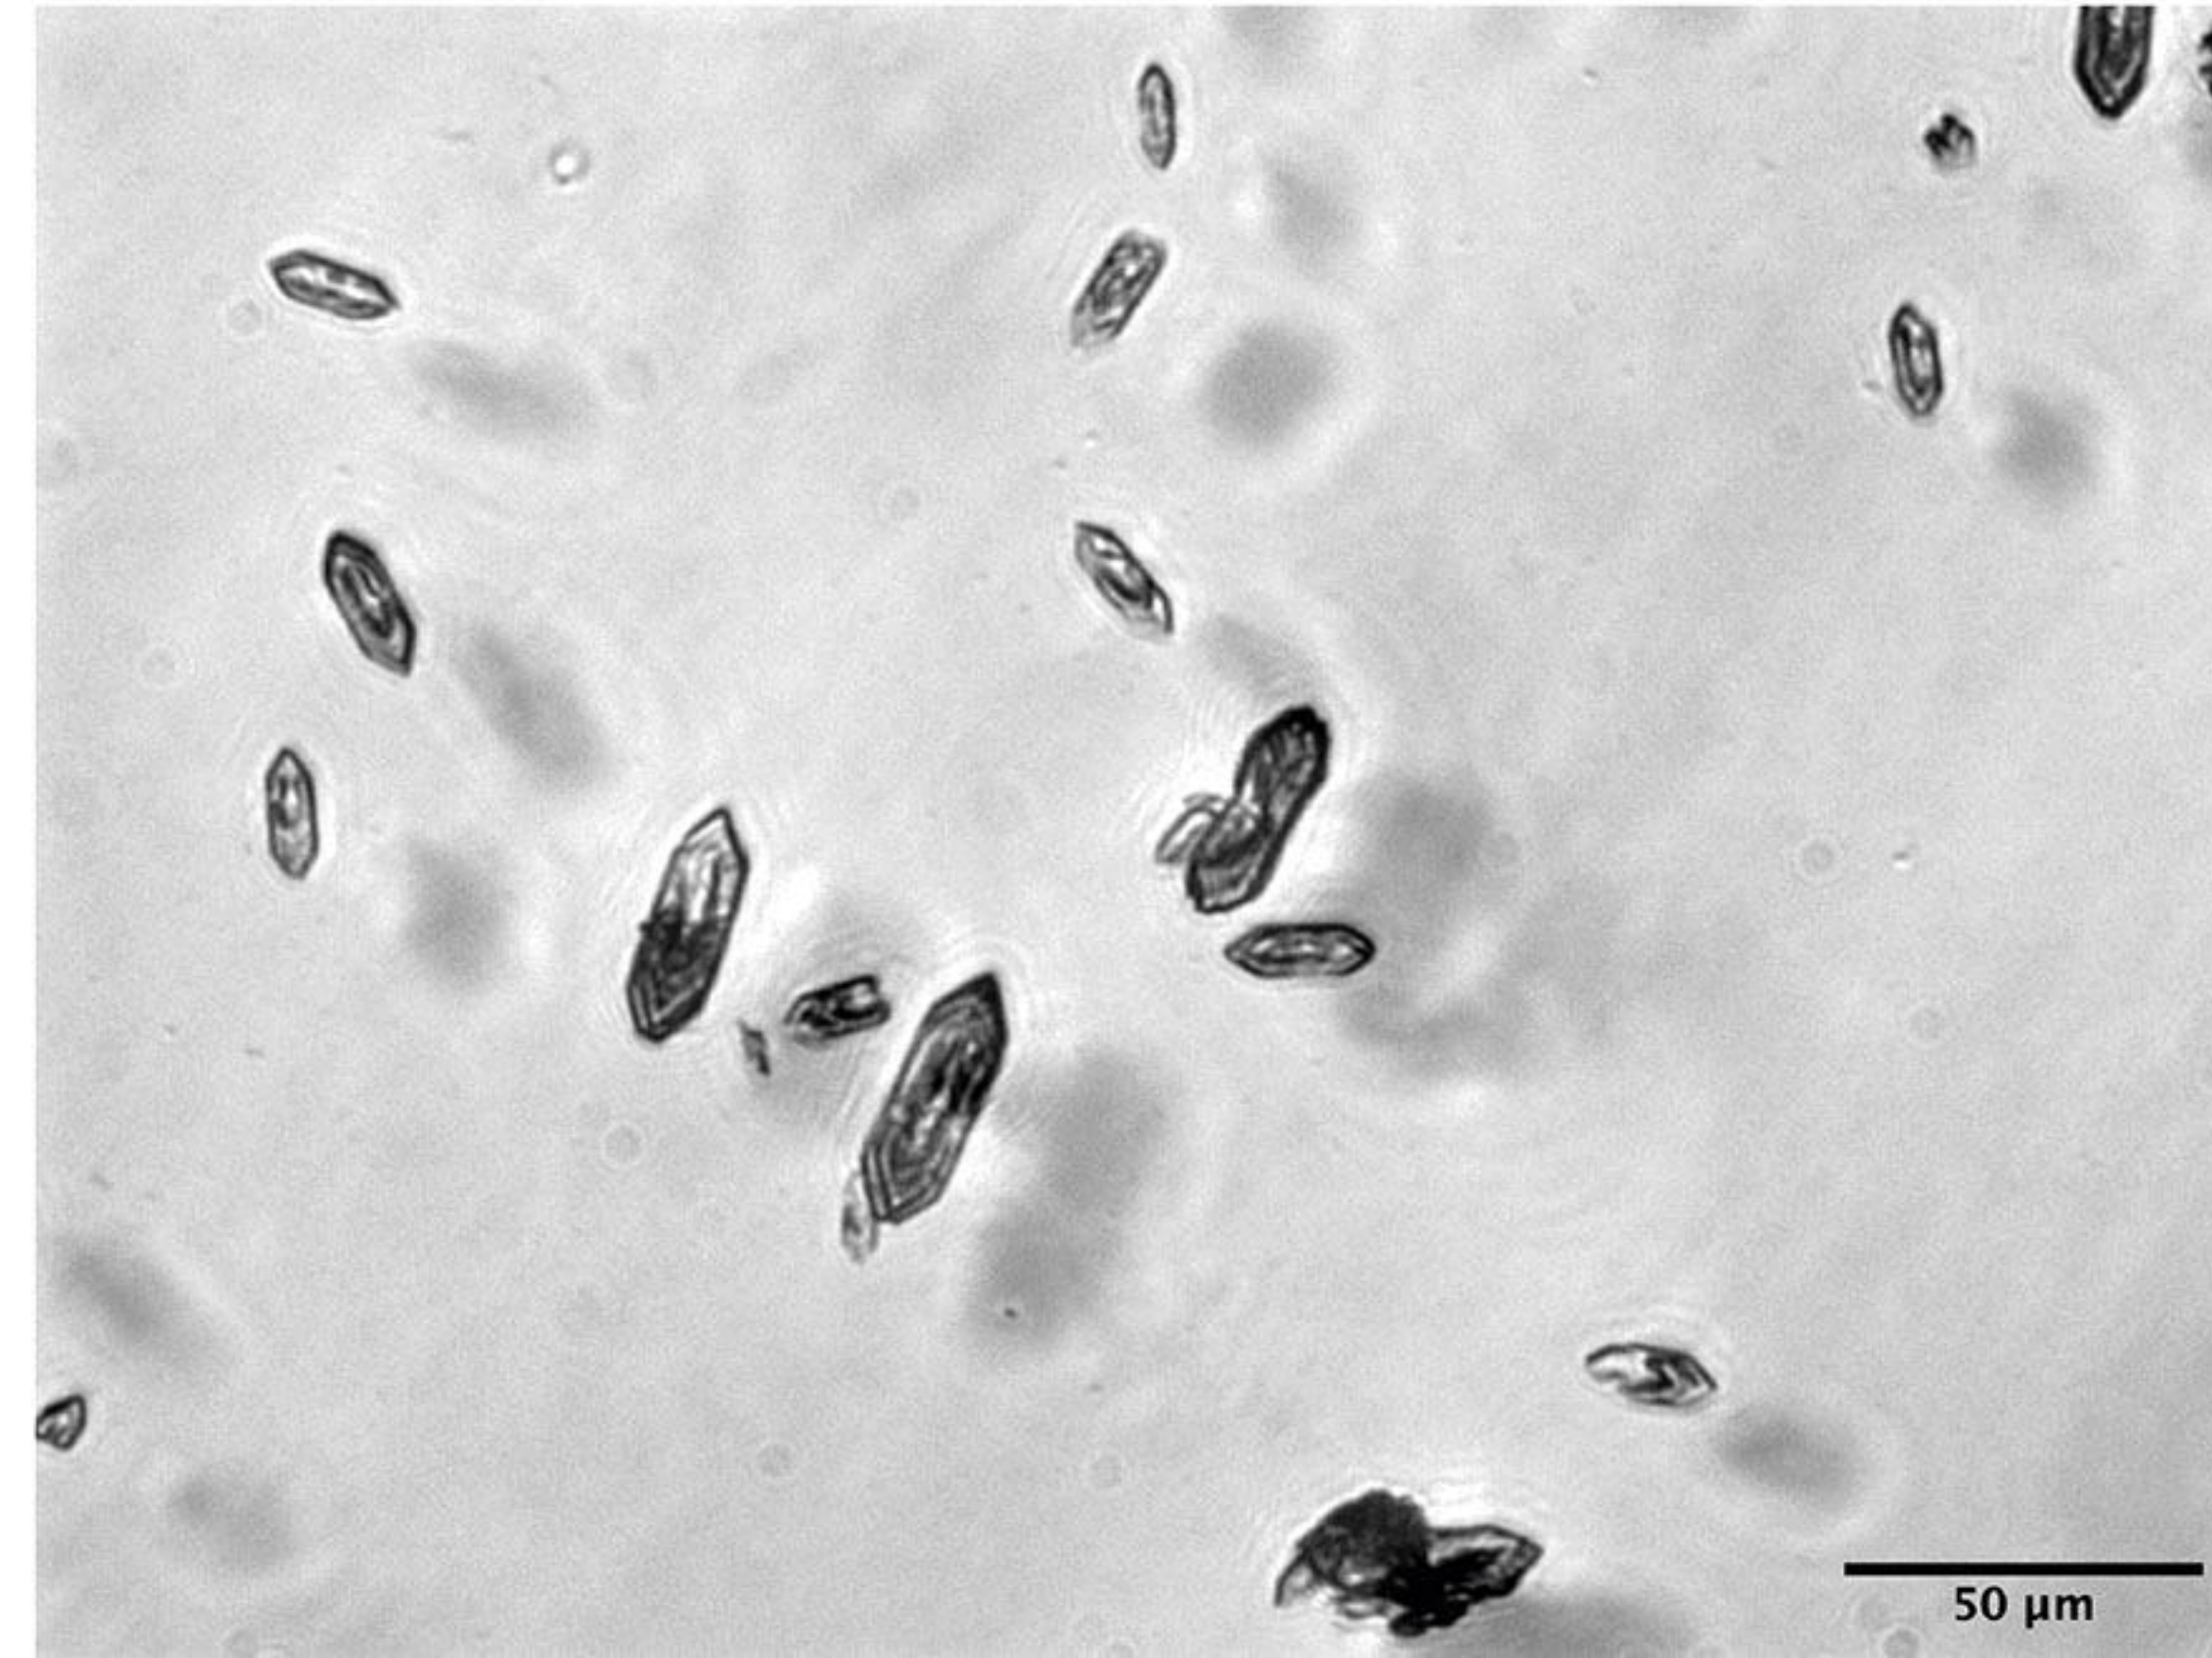**E**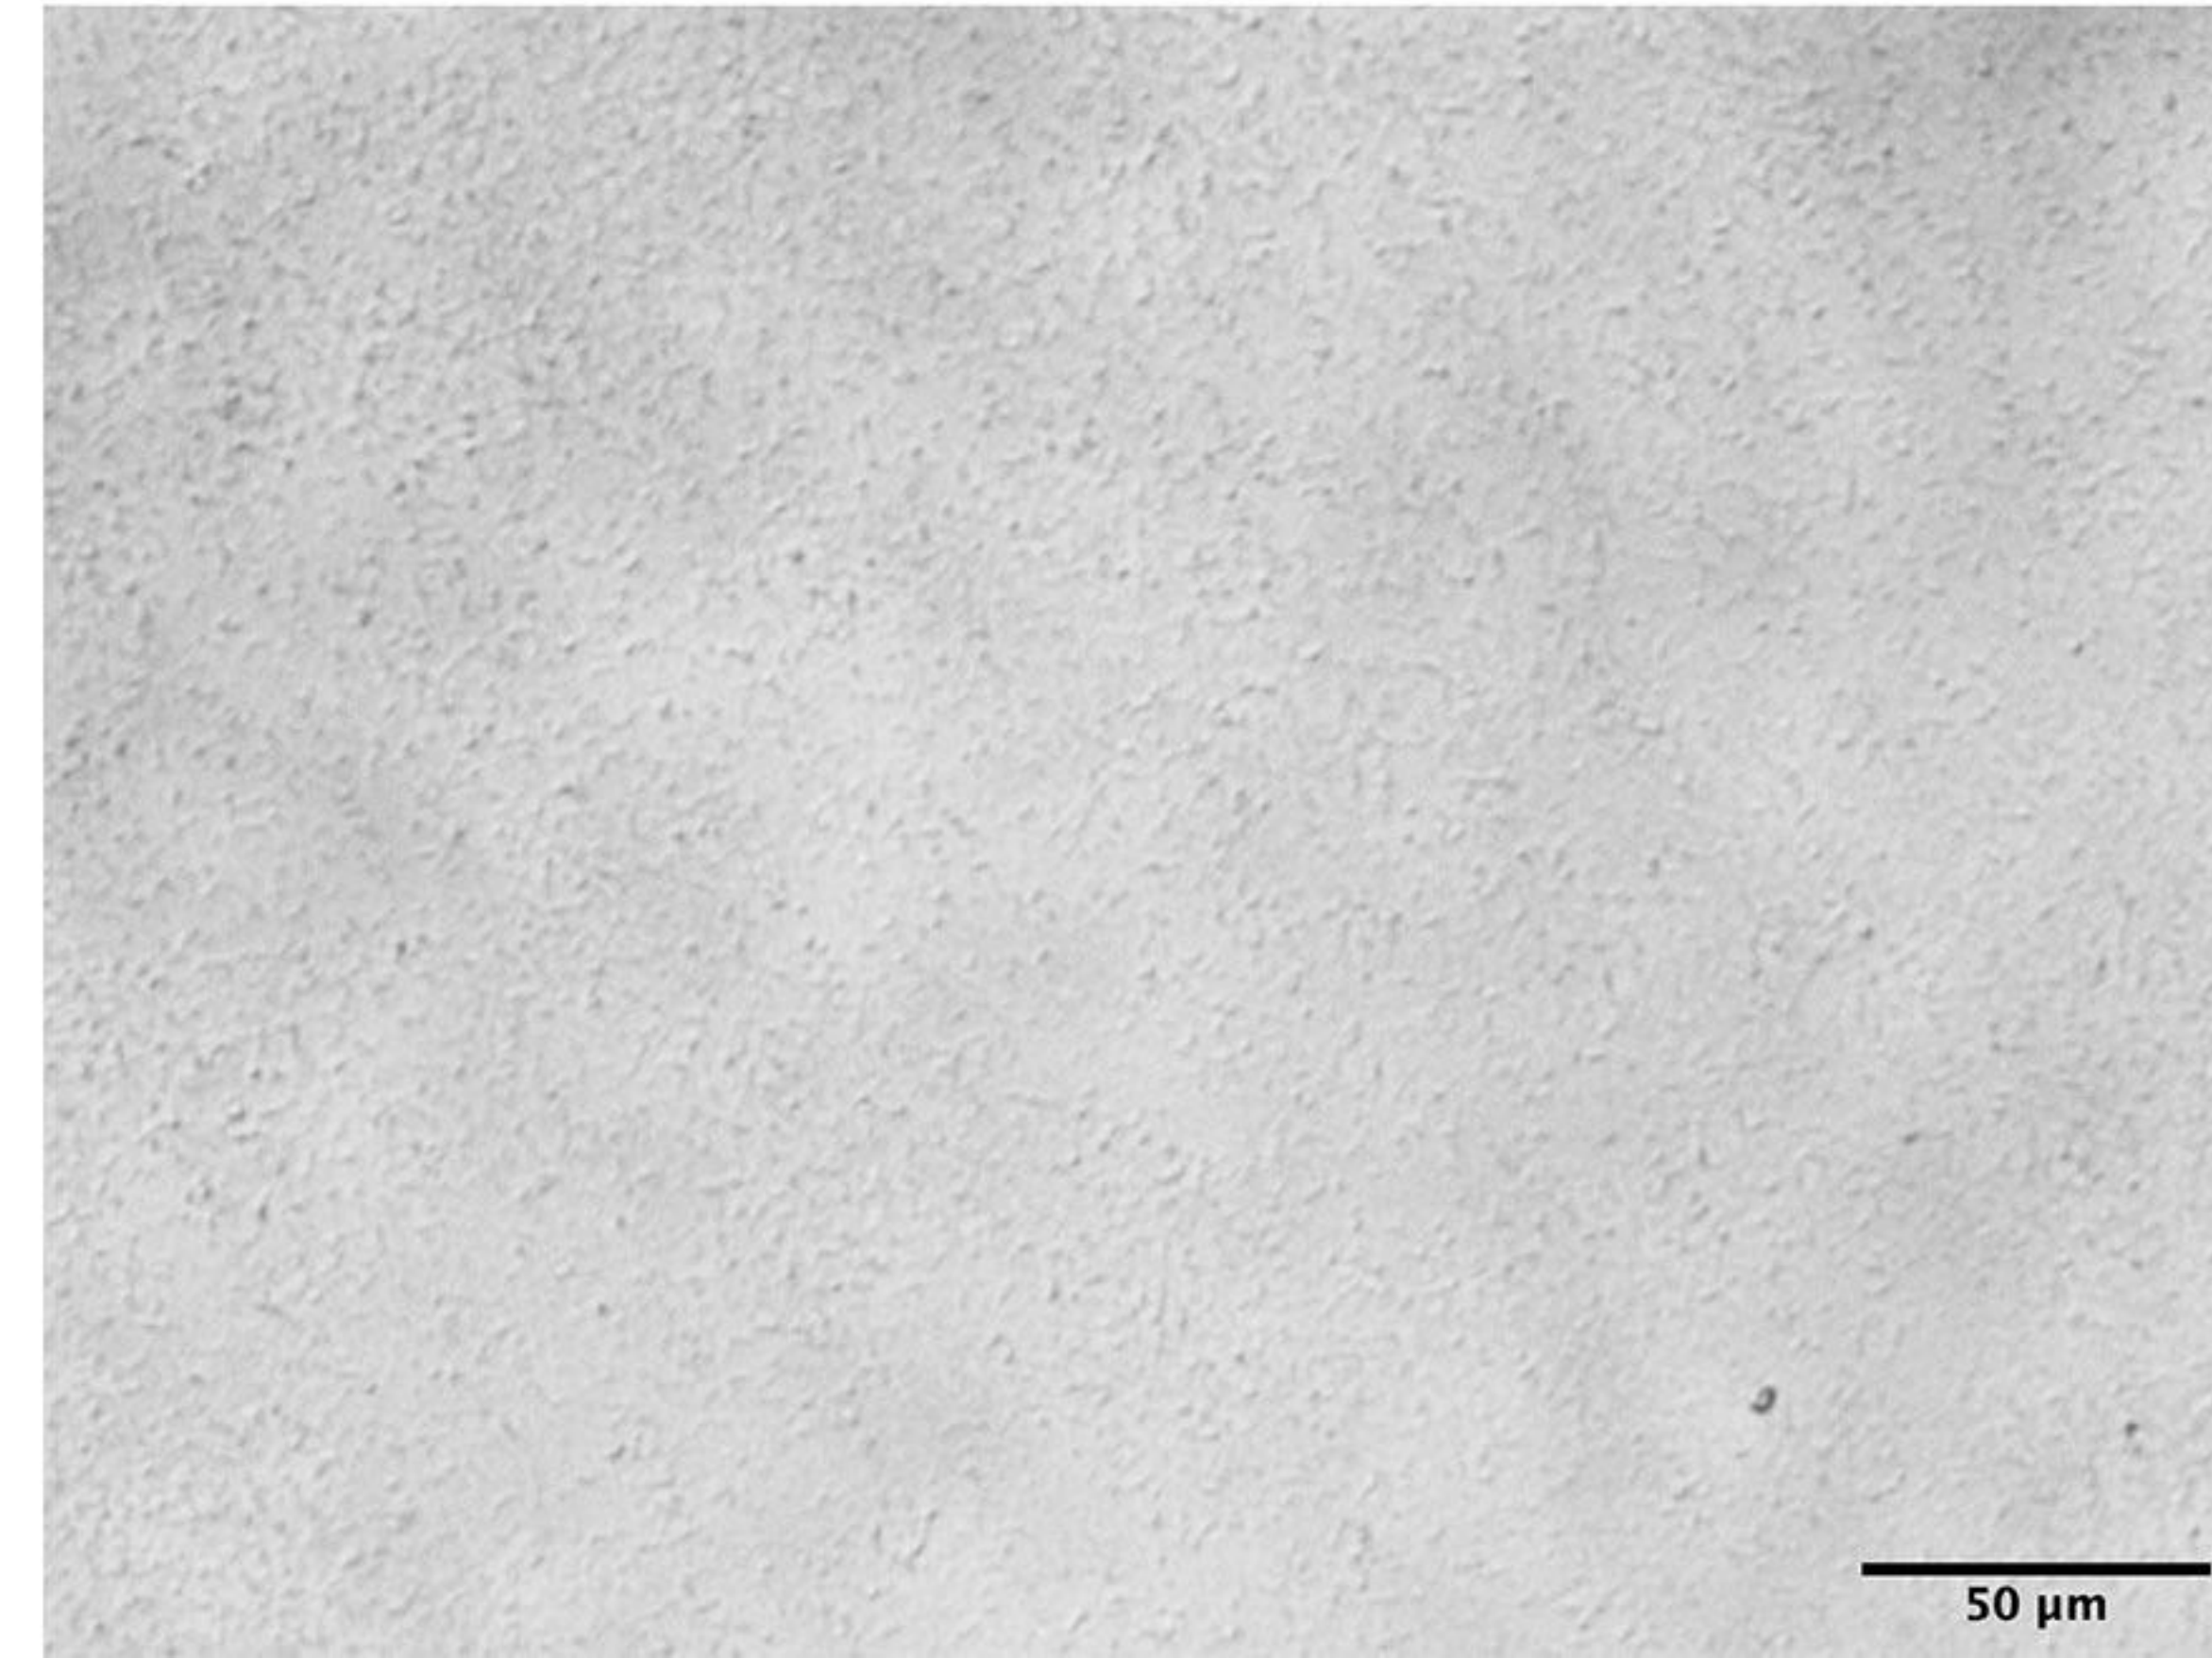

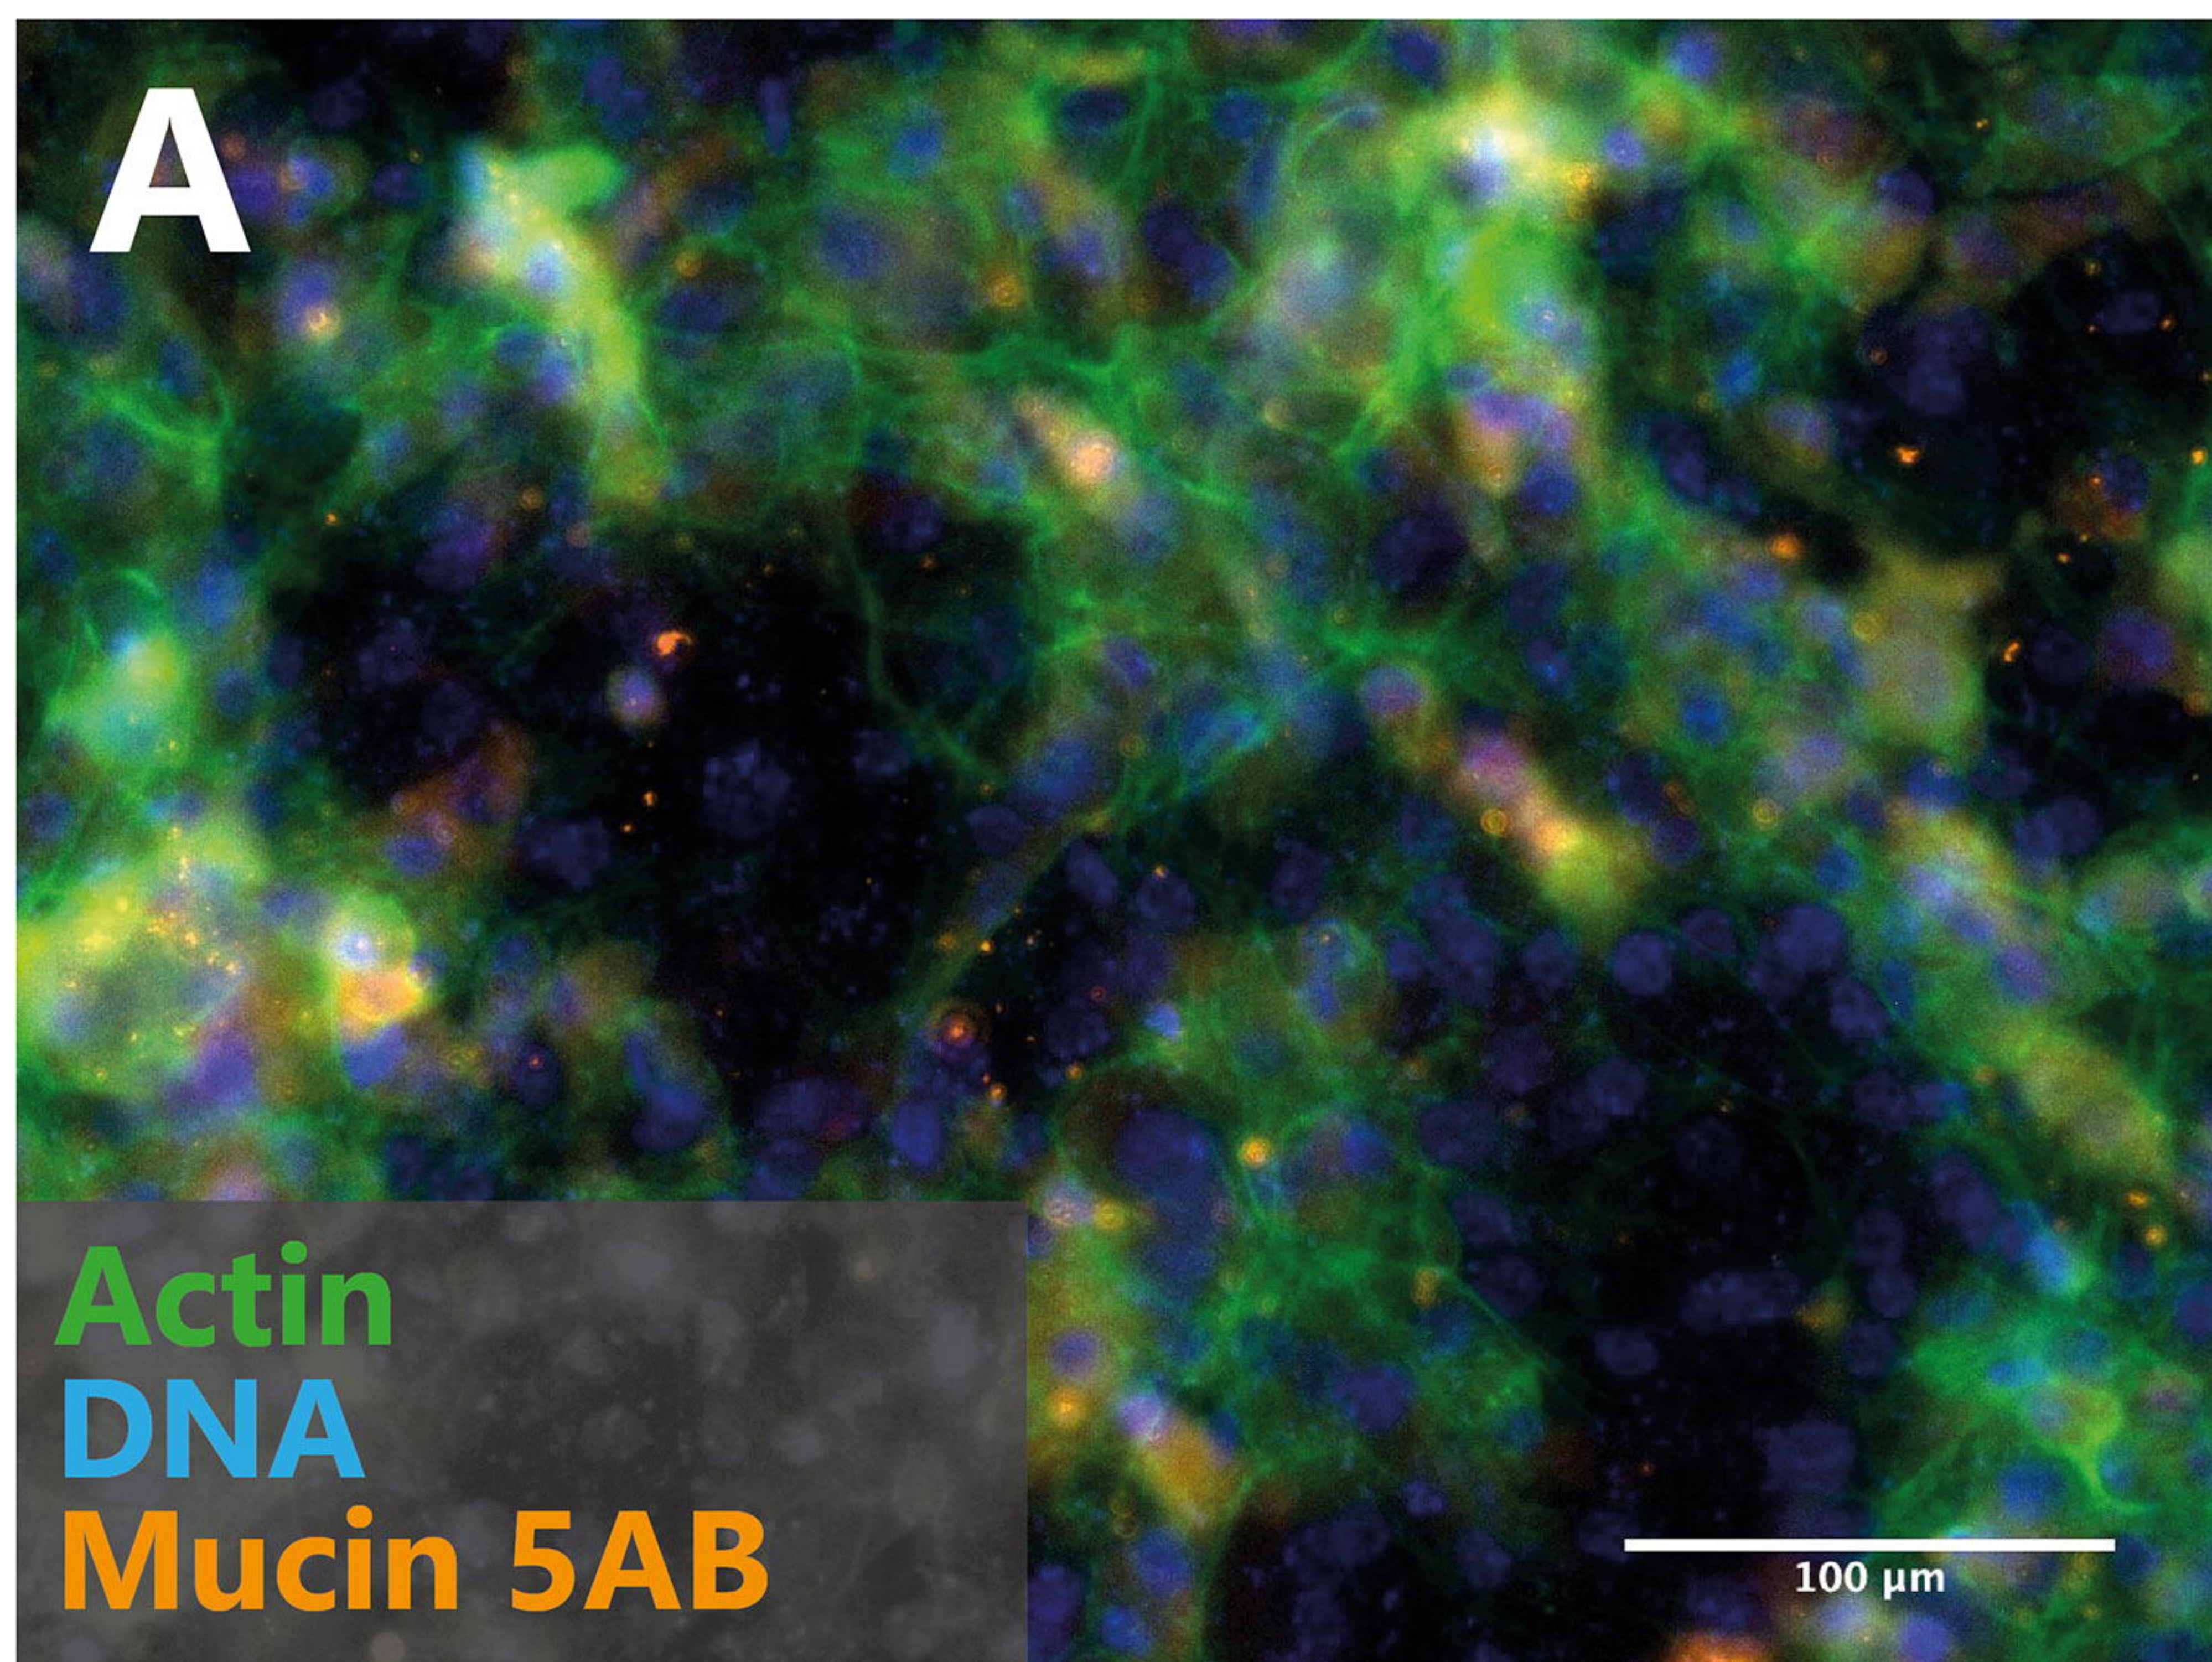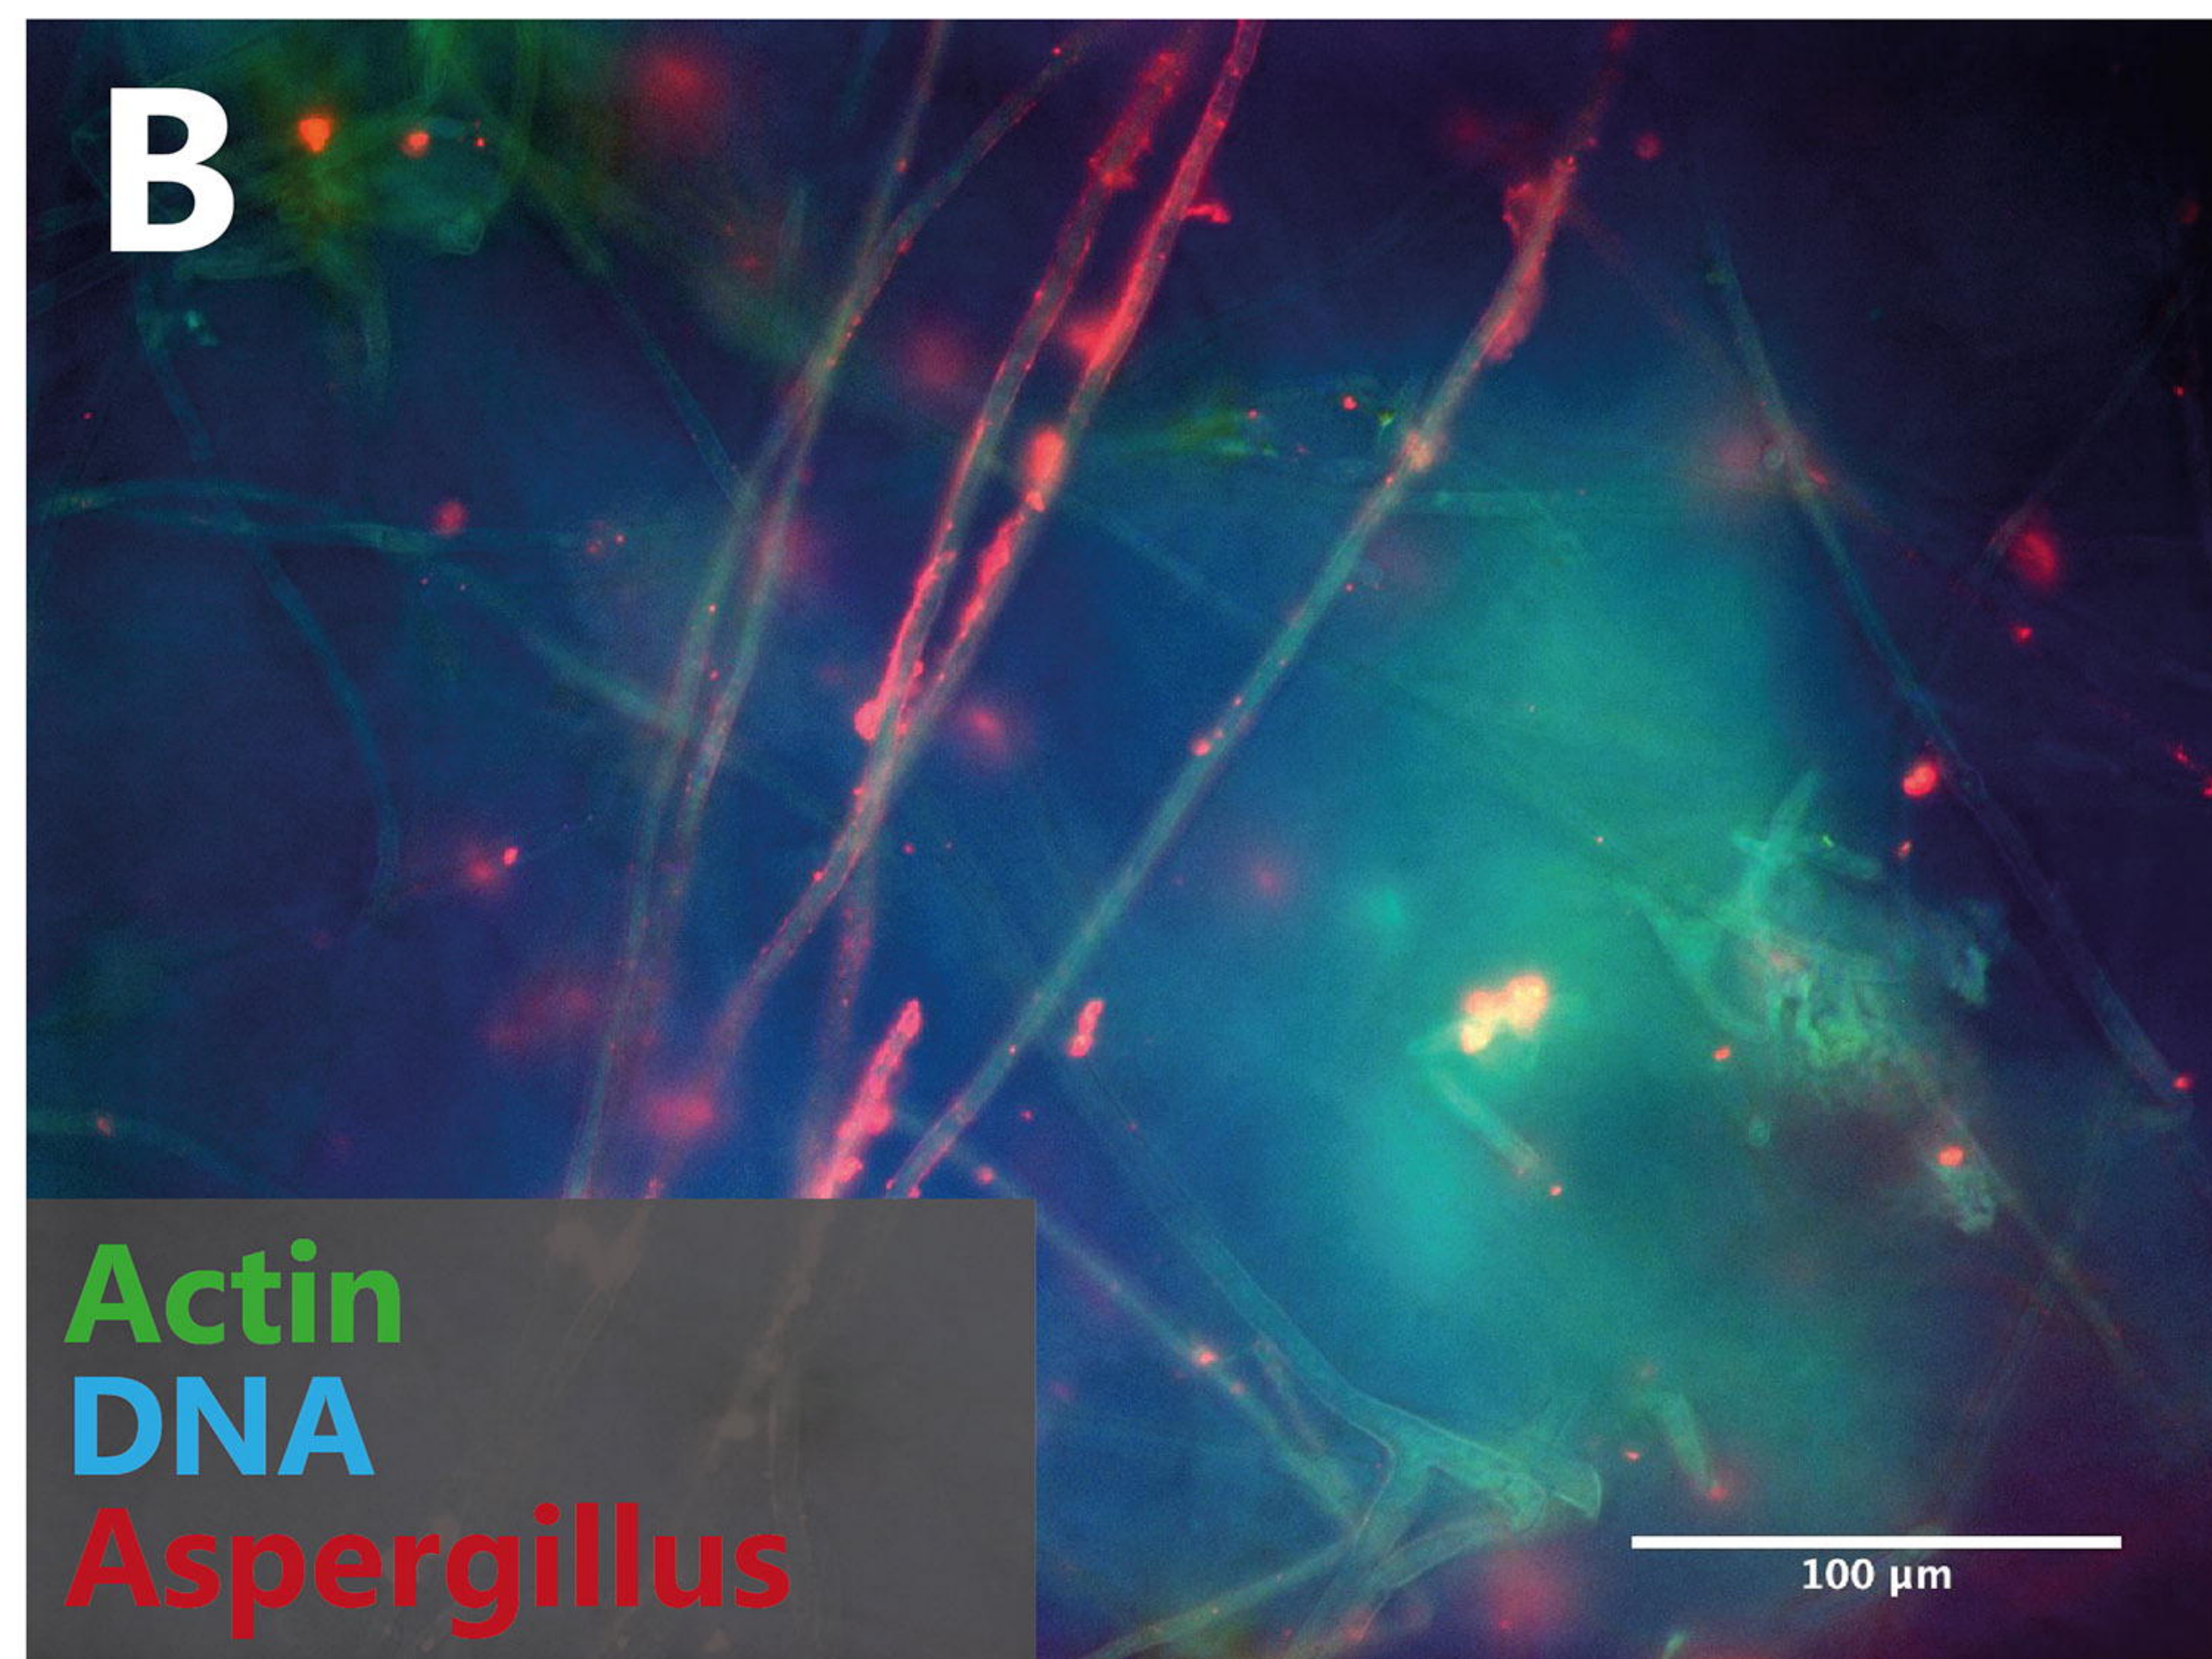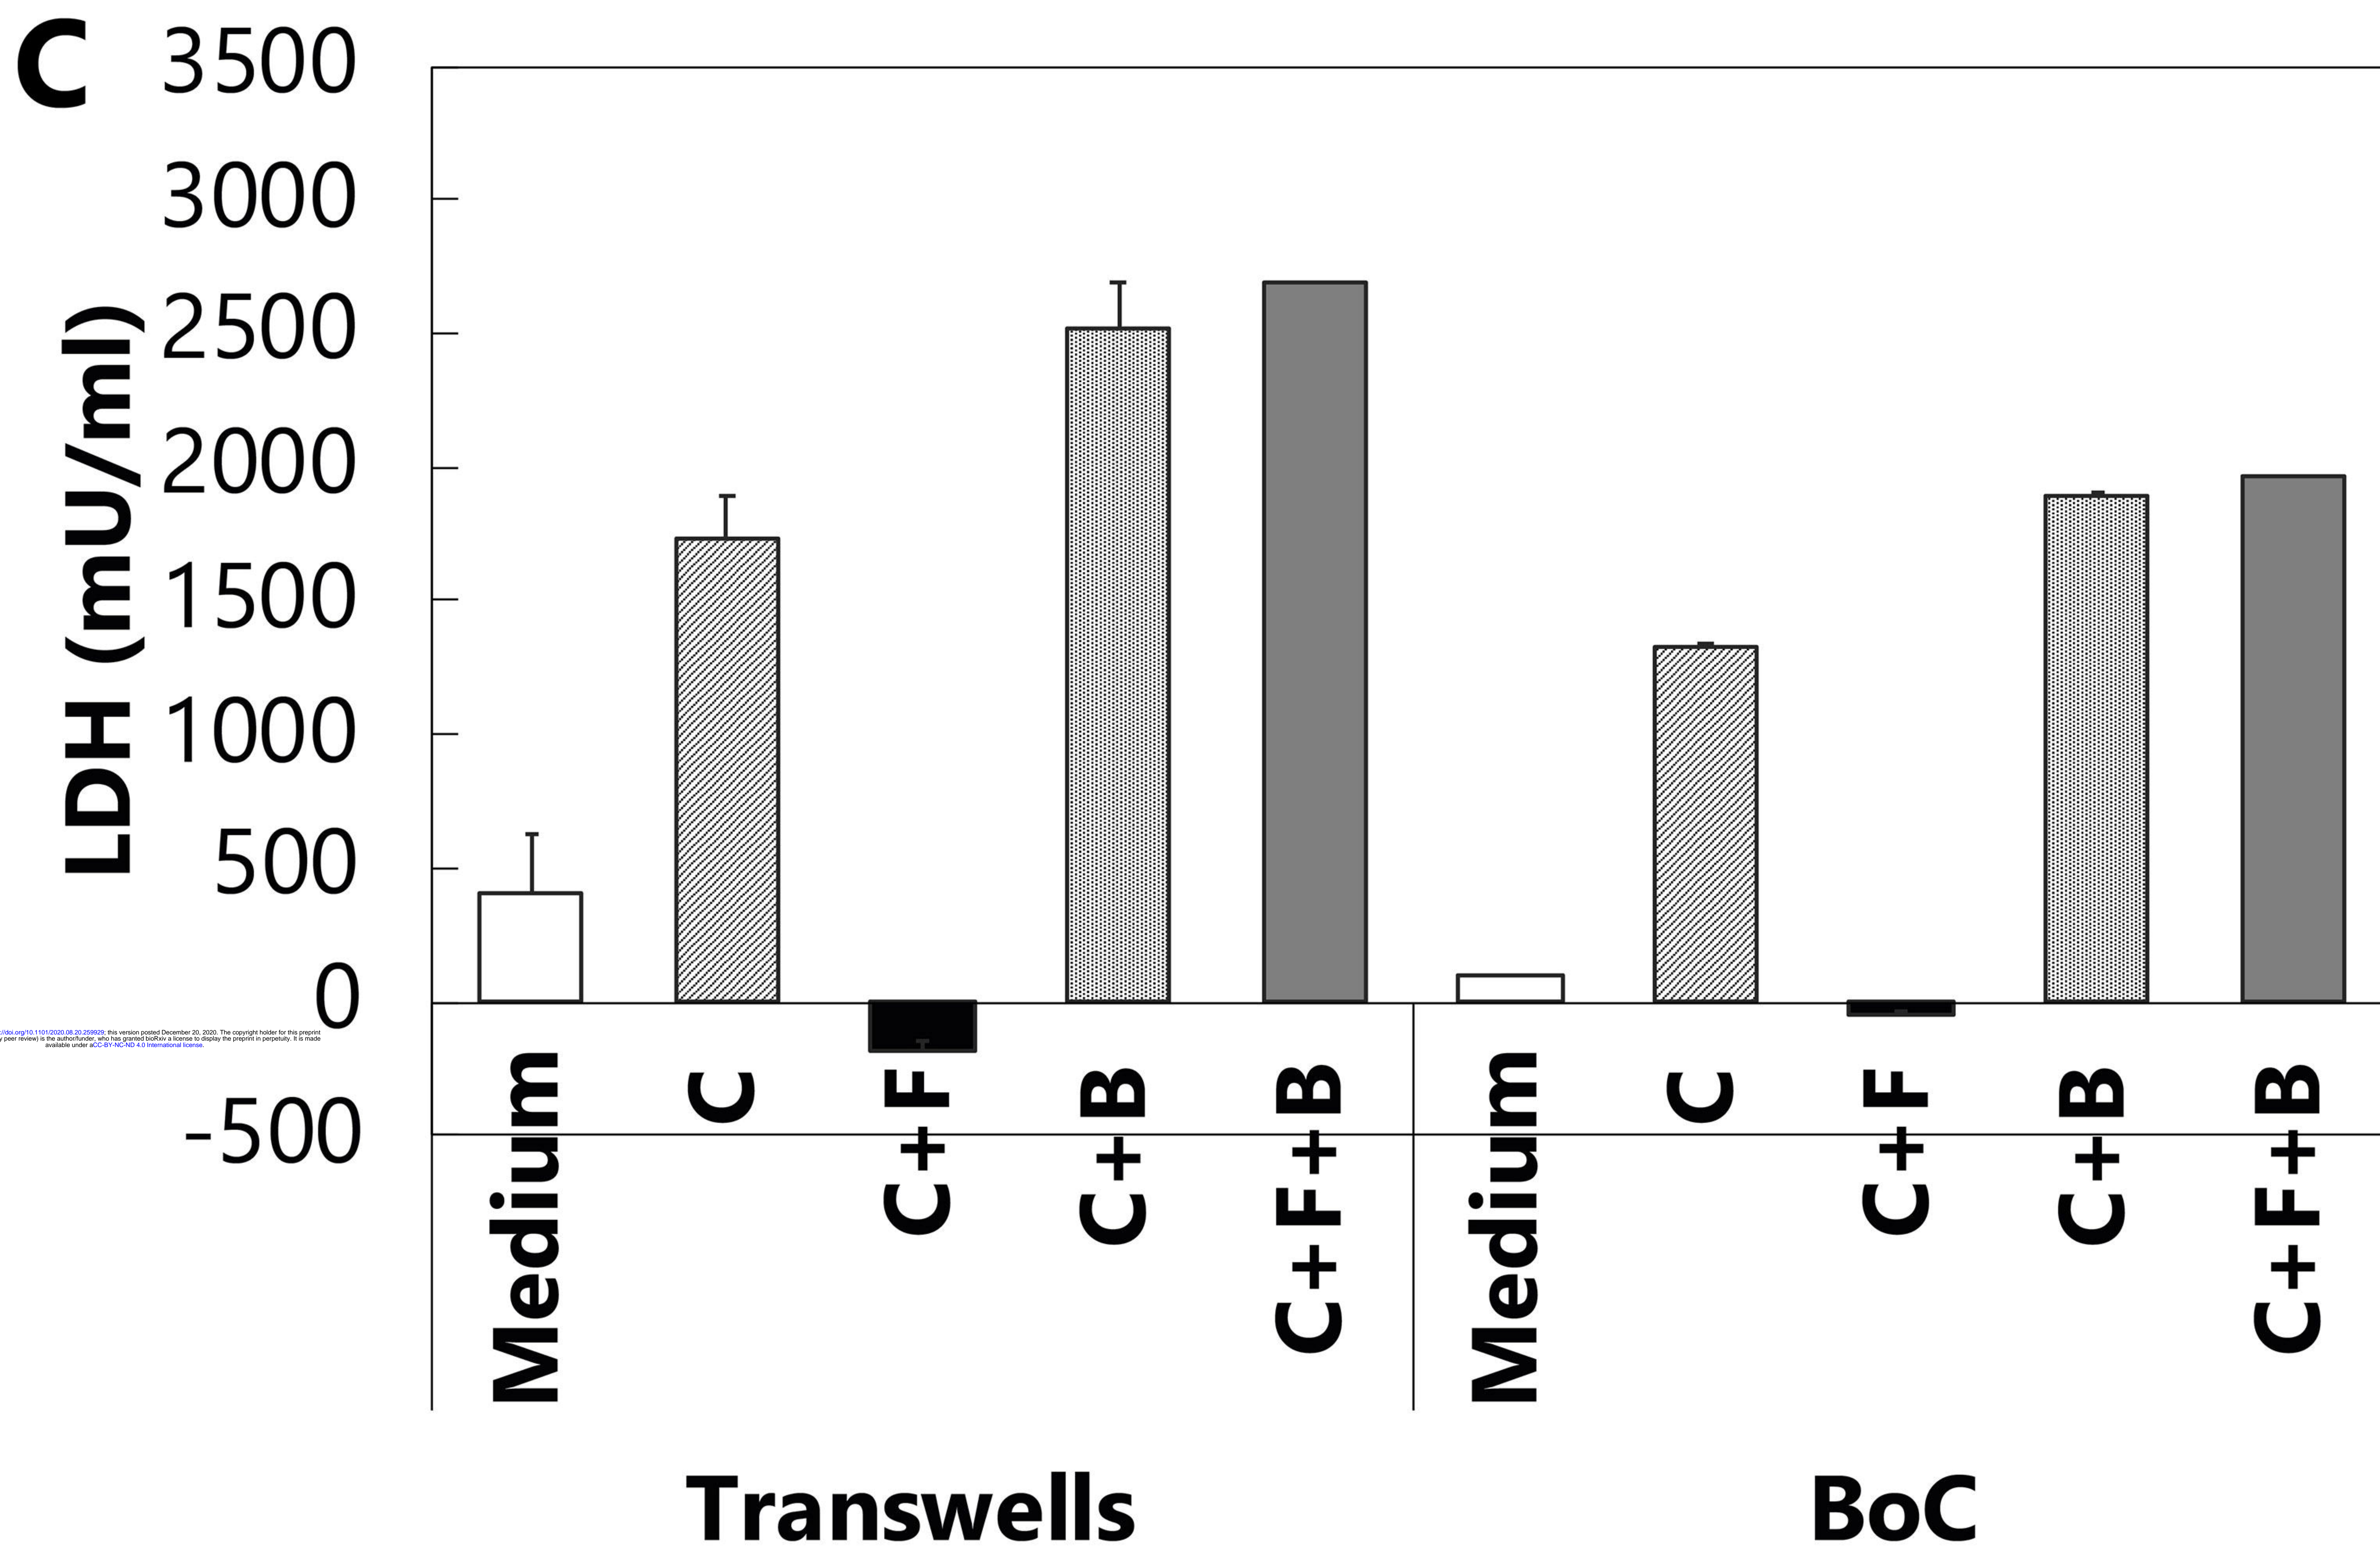

10 20 30 40 50 60 70 80 90 100  
An10g00820/1-342 MKV DTPD SAST I SMTNT I TITVEQDGI YE INGARQEPV VNLNMTGAS KLRKQ LRETNEL LCPGVYDGLSAR IAINL GFKGM YMTGAGTTASRLGMADLG  
ATET\_09284/1-339 ---MKVDEGP INASDIA ITITVEKDG VYEVNGVRHEP SVSVHMLT GATK LRRQL RESNEL IVC PGVYDGLSAR IAINL GFKAM YMTGAGTTASRLGMADLG  
AFL2T\_05949/1-337 -----MKVGDSSSSNLA ITITVEKDG FYEVNGTRQEP TVSLYMTAGAS KLRRLM LRETDDL IVC PGVYDG I SAR I AMGL GFKAM YMTGAGTTASRLGMADLG  
Afu2g00540/1-327 -----MS ITITVEKDG FYEVNGESREPT VNLMIAGAT KLRRY LRDTDEL IVC PGVYDGLSAR I AMQL GFRA LYMTGAGTTASRLGMADLG  
AFUB\_017600/1-327 -----MS ITITVEKDG FYEVNGESREPT VNLMIAGAT KLRRY LRDTDEL IVC PGVYDGLSAR I AMQL GFRA LYMTGAGTTASRLGMADLG  
NFIA\_032730/1-327 -----MS ITITVEKDG FYEVNGESREPT I SLYMIAGAT KLRKY LRDTDEL IVC PGVYDGLSAR I AMQL GFRA LYMTGAGTTASRLGMADLG  
NFIA\_080620/1-307 -----MP I VTAATA LRRSL EDLKSFI VAPGVYDGLSAR I ALSV GFDAL YMTGAGTAASVHGQADLG  
Afu2g03820/1-307 -----MP I VTAATA LRRSL EDLKSFI VAPGVYDGLSAR I ALSV GFDAL YMTGAGTAASVHGQADLG  
AFUB\_020890/1-307 -----MP I VTAATA LRRSL EDLKSFI VAPGVYDGLSAR I ALSV GFDAL YMTGAGTAASVHGQADLG  
AFL2T\_01407/1-323 -----MPM VTAAT GLRRT LEDPNS FV VAPGVYDGLSAR I ALSV GFDAL YMTGAGTAASVHGQADLG  
An07g08390/1-304 -----MPM VTAAT S LRRAL ENPDSFI VAPGVYDGLSAR V ALSA GFDAL YMTGAGTAASVHGQADLG  
ATET\_09508/1-303 -----MVLVSAAT KLRRL LEDPQSFI AAPGVYDGLSAR I ALSV GFDAL YMTGAGTAASVHGQADLG

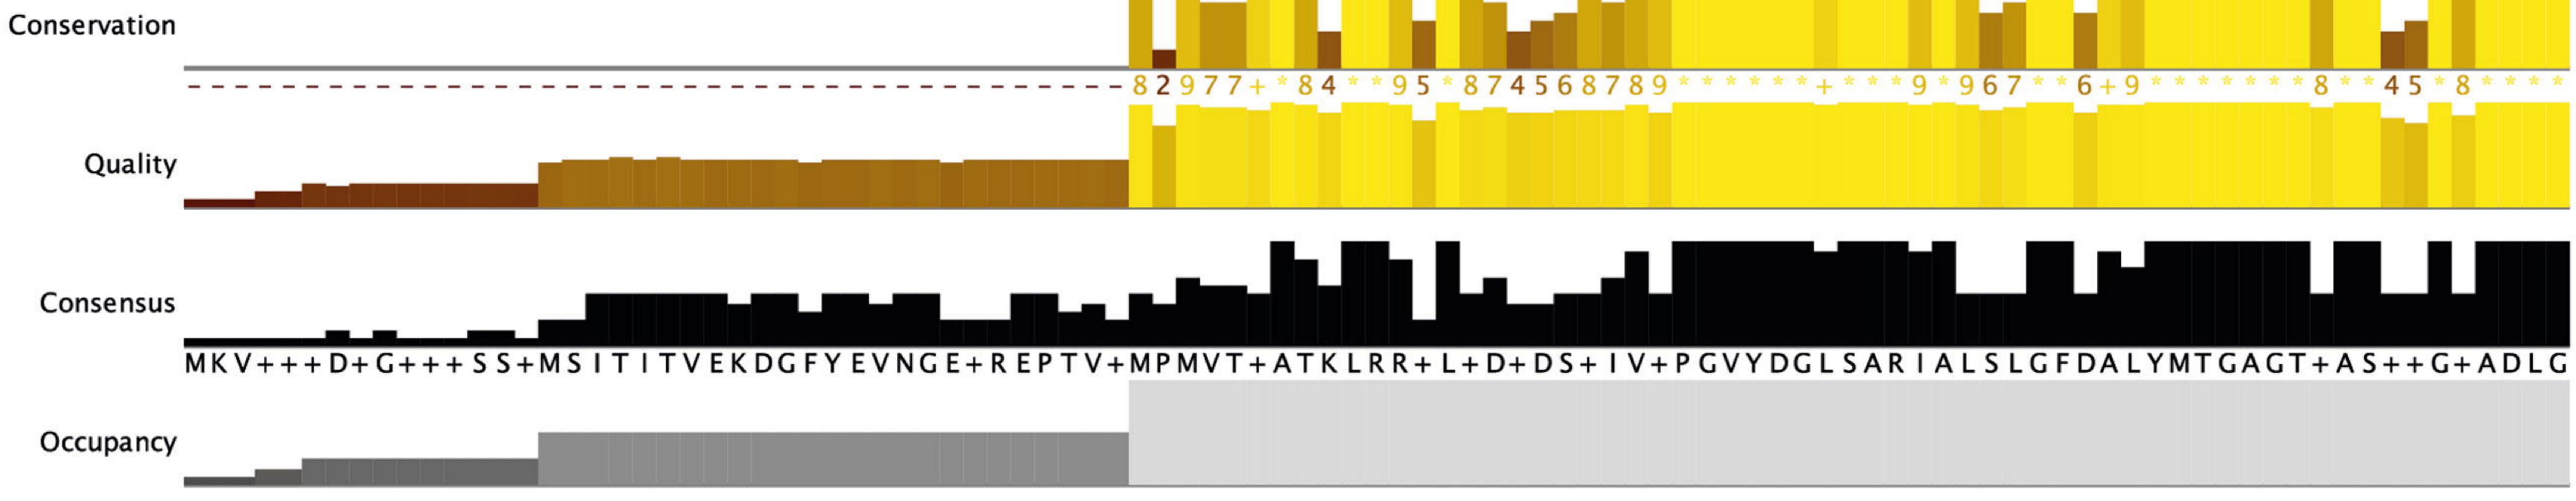

110 120 130 140 150 160 170 180 190 200  
An10g00820/1-342 LAHIY DMKTNAEMI ANLDP YG PPL IADMDTGYGGP L MVAR SVQQY IQAGVAGFHI EDQ IQNKR CGHLAGK RVVTMDEY LTR I RAAKLT KDR LRS DIVL IAR  
ATET\_09284/1-339 LAQLH DMRTNAEMI ANLDP FG PPL IADMDTGYGGP L MVA KSVQY IQAGVAGFHI EDQ IQNKR CGHLAGK AVVSLDEY LIR I RAAK QTKDR LHS DIVL IAR  
AFL2T\_05949/1-337 LAQLY DMRTNAEMI ANLDP FG PPL IADMDTGYGGP L MV S KSVQY IQAGVAGFHI EDQ IQNKR CGHLAGK KVV DLEEY LTR I RAAKLT KDR LRS DIVL IAR  
Afu2g00540/1-327 LAQLY DMRTNAEMI ANLDP FG PPL IADMDTGYGGP L MVA KSVQY IQAGVAGFHI EDQ IQNKR CGHLAGK KVV SMDEY LTR I RAAK QTKDR LRS DIVL IAR  
AFUB\_017600/1-327 LAQLY DMRTNAEMI ANLDP FG PPL IADMDTGYGGP L MVA KSVQY IQAGVAGFHI EDQ IQNKR CGHLAGK KVV SMDEY LTR I RAAK QTKDR LRS DIVL IAR  
NFIA\_032730/1-327 LAQLY DMRTNAEMI ANLDP FG PPL IADMDTGYGGP L MVA KSVQY IQAGVAGFHI EDQ IQNKR CGHLAGK KVV SMDEY LTR I RAAK QTKDR LRS DIVL IAR  
NFIA\_080620/1-307 ICT LNDMR ANA EML ANI SP - STPVI ADADTGYGGP I MVARTTEQY SRSGVAA FHI EDQVQT KRCGHLAGK I LVDKETY VSR I RAAVQARK RMGSDI VV IAR  
Afu2g03820/1-307 ICT LNDMR ANA EML ANI SP - STPVI ADADTGYGGP I MVARTTEQY SRSGVAA FHI EDQVQT KRCGHLAGK I LVDKETY VSR I RAAVQARK RMGSDI VV IAR  
AFUB\_020890/1-307 ICT LNDMR ANA EML ANI SP - STPVI ADADTGYGGP I MVARTTEQY SRSGVAA FHI EDQVQT KRCGHLAGK I LVDKETY VSR I RAAVQARK RMGSDI VV IAR  
AFL2T\_01407/1-323 ICT LNDMR ANA EML SNL SP - TTPVI ADADTGYGGP I MVARTTEQY SRSGVAA FHI EDQVQT KRCGHL G GK I LVDTDTY VTR I RAAVQARQR I GSDI VV IAR  
An07g08390/1-304 ICT LNDMR ANA EMI SNI SP - STPVI ADADTGYGGP I MVARTTEQY SRSGVAA FHI EDQVQT KRCGHLAGK I LVDTDTY VTR I RAAVQARQR I GSDI VV IAR  
ATET\_09508/1-303 ICT LNDMR ANA EML ANL SP - SVPVI ADADTGYGGP I MVARTTEQY ARS GVAGFHI EDQVQT KRCGHL G GK I L VDAAT FVTR I RAAVQARQR I GSDI VV IAR

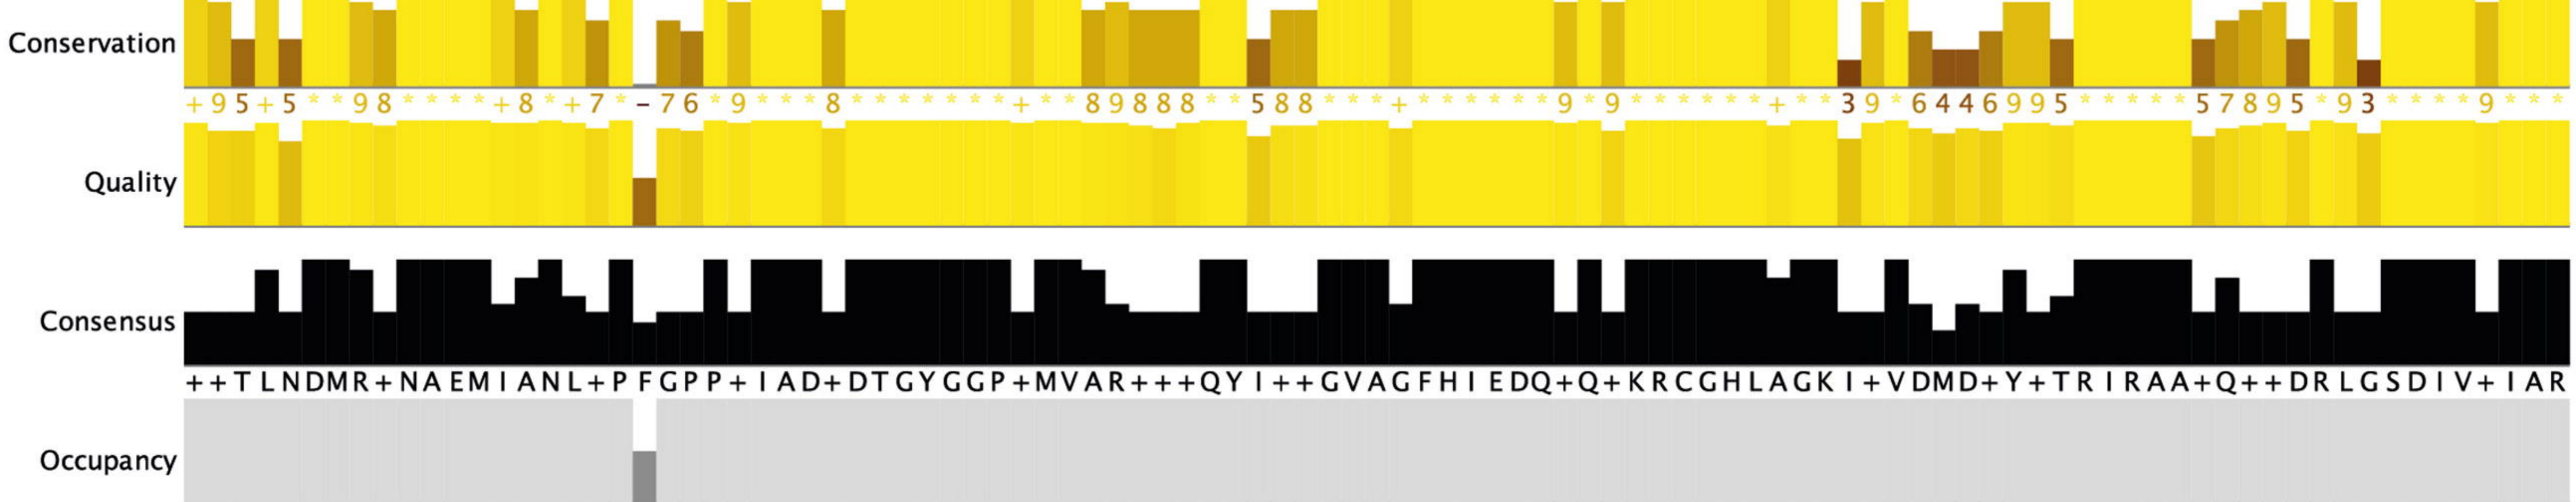

210 220 230 240 250 260 270 280 290 300  
An10g00820/1-342 TDALQQHGY DECIRRL KAARDL GADVGL LEGFTSKEMARR CVQDLAPWP LLLNMV ENGAGPVI SVDEAR EMGFRIMI FS FACITPAYMG I TAALERLKKDG  
ATET\_09284/1-339 TDALQQHGY DECIRRL KAARDL GADVGL LEGFTSKEQARQ AVQDLAPWP LLLNMV ENGAGPVI ITTEAK EMGFRIMI FS FASLAPAYLG I KAALERLKTG  
AFL2T\_05949/1-337 TDALQQHGY DECIRRL KAARDL GADVGL LEGFTSKEMARQ AVQDLAPWP LLLNMV ENGAGP I ITTKEAQ EMGFRIMI FS FACFAPAYLG I KAALERLKN  
Afu2g00540/1-327 TDALQQHGY DECIRRL KAARDL GADVGL LEGFTSKEMARQ AVQDLAPWP LLLNMV ENGAGPVI ITTKEAK EMGFRIMI FS FASLAPAYLG I KSALERLKN  
AFUB\_017600/1-327 TDALQQHGY DECIRRL KAARDL GADVGL LEGFTSKEMARQ AVQDLAPWP LLLNMV ENGAGPVI ITTKEAK EMGFRIMI FS FASLAPAYLG I KSALERLKN  
NFIA\_032730/1-327 TDALQQHGY DECIRRL KAARDI GADVGL LEGFTSKEMARQ AVQDLAPWP LLLNMV ENGAGPVI ITTKEAK DMGFRIMI FS FASLAPAYLG I RSALERLKN  
NFIA\_080620/1-307 TDALQGHGY EESVAR LRAARDAGADVGF LEGITSKEMARQ VVQDLAPWP MLLNMV EHGATPSI SADEAK EMGFR I I I FPA AIGPALTA I REGMEK LKRDG  
Afu2g03820/1-307 TDALQGYGY EESVAR LRAARDAGADVGF LEGITSKEMARQ VVQDLAPWP MLLNMV EHGATPSI SADEAK EMGFR I I I FPA AIGPALTA I REGMEK LKRDG  
AFUB\_020890/1-307 TDALQGYGY EESVAR LRAARDAGADVGF LEGITSKEMARQ VVQDLAPWP MLLNMV EHGATPSI SADEAK EMGFR I I I FPA AIGPALTA I REGMEK LKRDG  
AFL2T\_01407/1-323 TDSLQTHGY EESVAR LRAARDAGADVGF LEGITSKEMARQ VVKELAPWP MLLNMV EHGATPSI SAAEAK EMGFR I I I FPA L G PAVQA I REAMEK LKADG  
An07g08390/1-304 TDSLQTHGY EESVAR LRAARDAGADVGF LEGITSR EMARQV IQDLAGWP LLLNMV EHGATPSI SAAEAK EMGFR I I I FPA ALGPAVAA I REAMEK LKRDG  
ATET\_09508/1-303 TDALQQLGY EESVAR LRAARDAGADVGF LEGITSR EQARRV VADLAPWP MLLNMV EHGATPSI ITAAEAR EMGFRVVI YPFAA I G PAVQA I REGMEK LKRDG

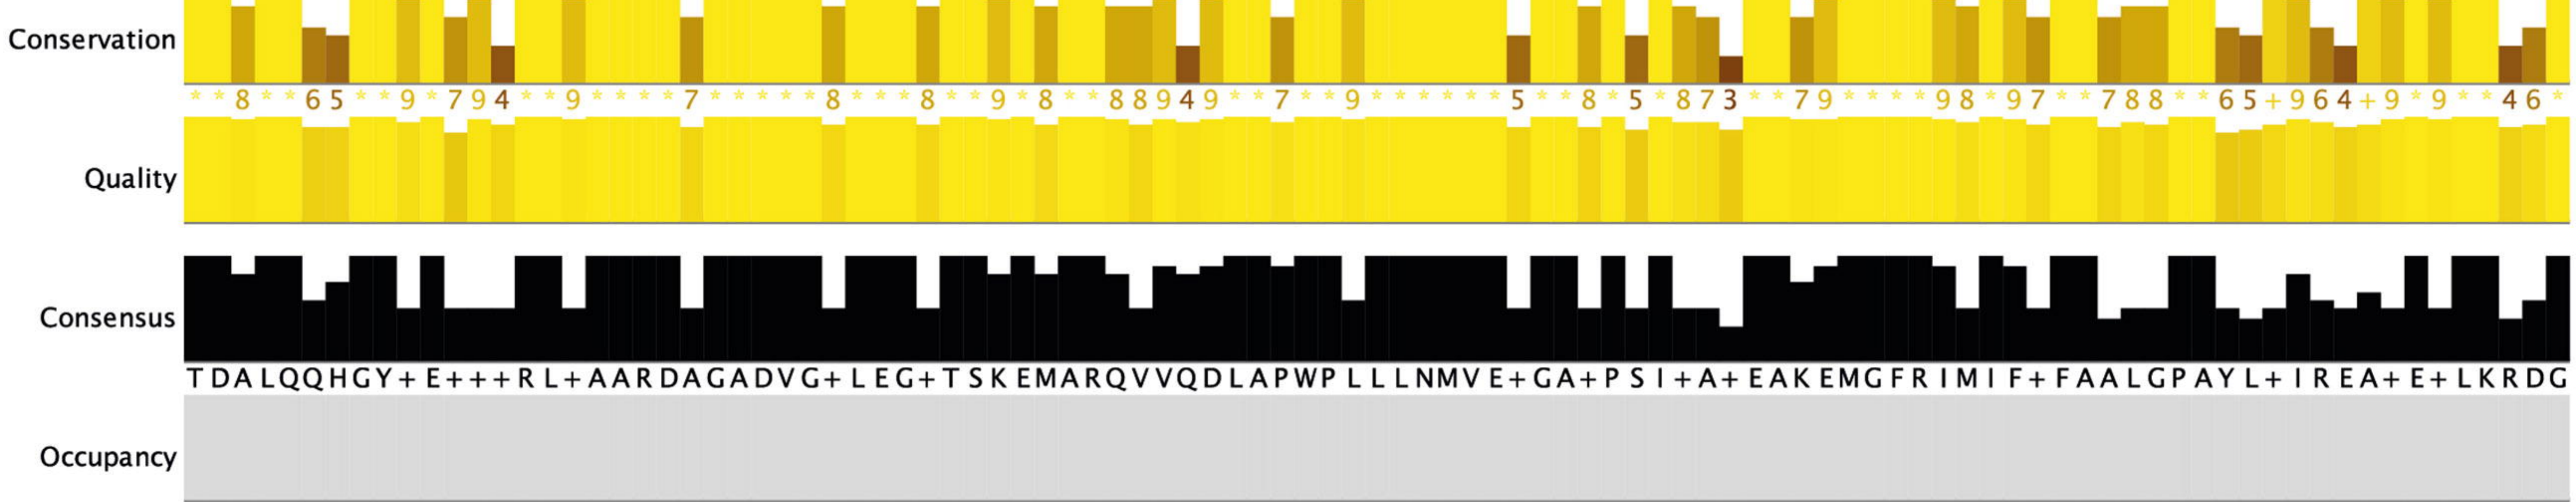

310 320 330 340 350 360  
An10g00820/1-342 VVGLPEMGP KKL FEVCGLMDSVRVDT EAGGDSGFANGV \*  
ATET\_09284/1-339 VVGTP ENVGP KKL FEVCGLMDSVHI DTNAGGDSGFANGV \*  
AFL2T\_05949/1-337 VVGIPDGLGPKKL FEVCGLMDSMKI DT EAGGSGFTNGV \*  
Afu2g00540/1-327 ITGIPEGLGPKKL FEVCGLMDSVRIDT EAGGDSGFNTGV \*  
AFUB\_017600/1-327 ITGIPEGLGPKKL FEVCGLMDSVRIDT EAGGDSGFNTGV \*  
NFIA\_032730/1-327 ITGIPEGLGPKKL FEVCGLMDSMRIDT EAGGDSGFNTGV \*  
NFIA\_080620/1-307 LPGLSKELTPQML FRVCGLDSE LKVD A EAGGAA FQGGVDLEDKE \*  
Afu2g03820/1-307 LPGLSKELTPQML FRVCGLDSE LKVD A EAGGAA FQGGVDLEDTE \*  
AFUB\_020890/1-307 LPGLSKELTPQML FRVCGLDSE LKVD A EAGGAA FQGGVDLEDKE \*  
AFL2T\_01407/1-323 IPGLSKELTPQML FRVCGLDSE I KVD A EAGGAA FEGGVDLKYFISSTIPVCKSNEYSEGG \*  
An07g08390/1-304 IPGLDKEMTPQML FRVCGLDSE SMKVDAQAGGAA FDGGVDLK \*  
ATET\_09508/1-303 IPGLDKEMTPQML FRVCGLDSE SVKVD E EAGGAS FEGGVDL \*

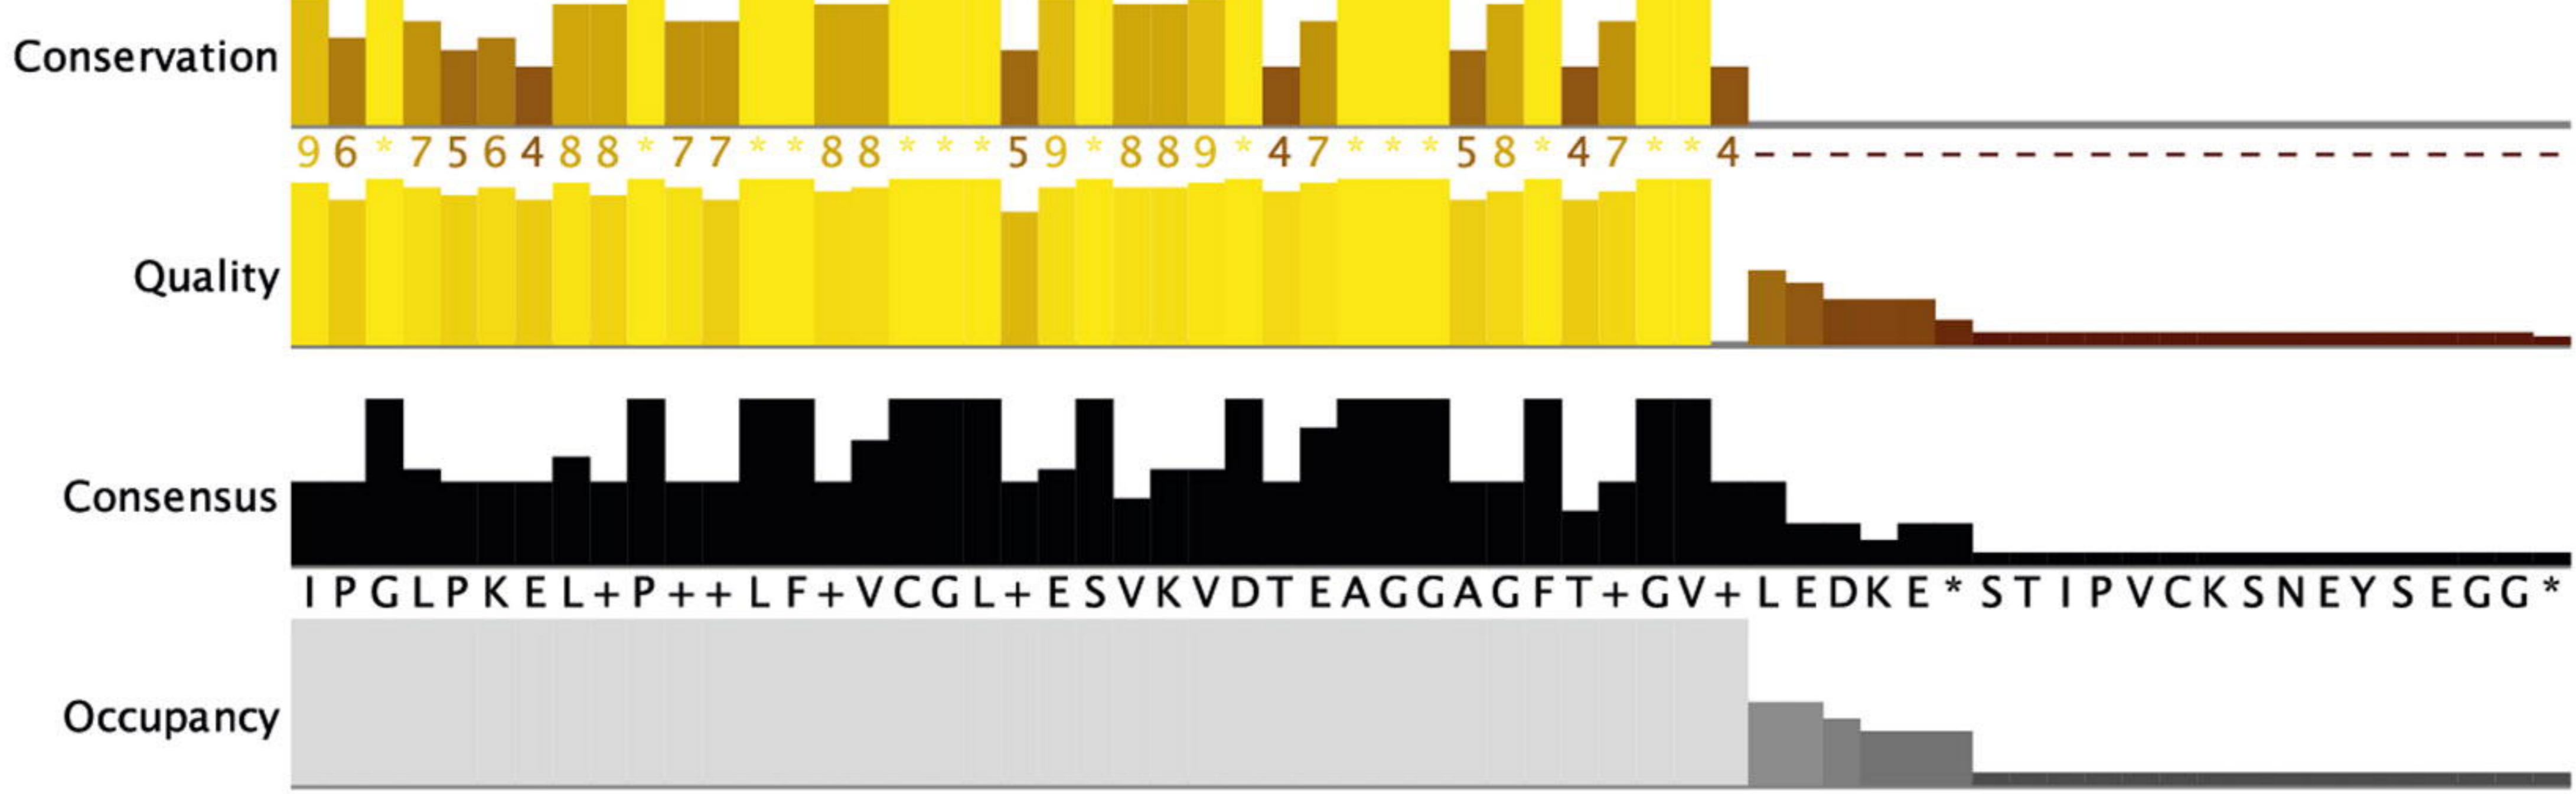

Source: https://www.biorxiv.org/content/10.1101/2020.08.20.259929v3.full.pdf
